# Supplementary material for: Oligocene–Miocene paleoceanography off the Wilkes Land Margin (East Antarctica) based on organic-walled dinoflagellate cysts
Source: Copernicus journal article supplement (doi:10.5194/cp-2017-148), 2017-12-05
Supplement: Supplementary file 1 [file Tables oceanography.xls]

## Sheet: dino ecogroups and litho
mid-depth	Selenopemphix antarctica	Selenopemphix cpx	Lejeunecysta cpx	Brigantedinium cpx	Malvinia escutiana	Protoperidinium cpx	Spiniferites	Nematosphaeropsis	Batiacasphaera	Corrudinium, Cerebrocysta, Pyxidinopsis	Operculodinium	Impagidinium	others	p/g	lithology
95.61	39.5349	39.5349	0	25.5814	0	0	0	0	4.65116	2.32558	2.32558	20.9302	4.65116	65.1163	miocene deposits
106.61	15.2542	15.2542	0.847458	4.23729	0	2.54237	0	16.1017	20.339	12.7119	6.77966	1.69492	19.4915	22.8814	miocene deposits
116.41	2.38095	2.38095	0	2.38095	0	4.7619	0	50	16.6667	7.14286	0	16.6667	0	9.52381	miocene deposits
127.31	15.3846	25	5.76923	11.5385	0	3.84615	0	15.3846	17.3077	3.84615	5.76923	9.61538	1.92308	46.1538	miocene deposits
129.81	1.49254	32.8358	1.49254	44.7761	0	5.97015	0	2.98507	4.47761	0	4.47761	2.98507	0	85.0746	miocene deposits
141.01	12	38	4	38	0	4	0	2	0	4	2	6	2	84	miocene deposits
156.21	8.69565	46.3768	2.89855	28.9855	0	11.5942	0	0	1.44928	1.44928	1.44928	1.44928	4.34783	89.8551	miocene deposits
165.72	13.6364	34.8485	6.06061	22.7273	0	22.7273	0	0	0	0	6.06061	1.51515	6.06061	86.3636	miocene deposits
178.32	0	0	0	0	0	1.47059	0	26.4706	5.88235	14.7059	29.4118	10.2941	11.7647	1.47059	miocene deposits
183.41	15.5556	24.4444	6.66667	31.1111	0	6.66667	0	0	0	4.44444	6.66667	0	20	68.8889	miocene deposits
193.01	4.87805	34.1463	0	28.0488	0	0	0	0	14.6341	1.21951	8.53659	1.21951	12.1951	62.1951	miocene deposits
282.21	0	0	0	1.38889	0	0	2.77778	5.55556	5.55556	12.5	43.0556	13.8889	15.2778	1.38889	miocene deposits
316.18	3.00752	3.00752	0	3.7594	0	0.75188	0	0	24.0602	11.2782	21.0526	1.50376	34.5865	7.5188	miocene deposits
320.11	13.5802	23.4568	2.46914	34.5679	0	0	0	0	16.0494	12.3457	6.17284	3.7037	1.23457	60.4938	miocene deposits
327.21	3.18471	7.64331	5.73248	36.9427	0	1.91083	0	3.18471	29.9363	8.28025	3.82166	1.91083	0.636943	52.2293	miocene deposits
374.9	0	4.16667	0	0	0	8.33333	0	8.33333	8.33333	12.5	33.3333	12.5	12.5	12.5	miocene deposits
393.91	2.15054	5.37634	2.15054	4.30108	0	0	0	13.9785	19.3548	1.07527	27.957	25.8065	0	11.828	miocene deposits
403.71	0	1.2987	0	0	0	0	0	12.987	5.19481	7.79221	16.8831	54.5455	1.2987	1.2987	carbonate-cemented beds
411.81	0	0	0	0	0	0	0	22.1053	18.9474	6.31579	14.7368	25.2632	12.6316	0	carbonate-cemented beds
421.32	0	3.94737	10.5263	53.9474	0	19.7368	0	0	2.63158	0	0	0	9.21053	88.1579	carbonate-cemented beds
421.62	1.81818	1.81818	5.45455	54.5455	0	14.5455	0	0	0	1.81818	1.81818	0	20	76.3636	carbonate-cemented beds
421.77	0	0	3.75	87.5	0	2.5	0	0	2.5	0	1.25	2.5	0	93.75	carbonate-cemented beds
421.92	0.806452	4.83871	12.9032	60.4839	0	11.2903	0	0	1.6129	4.03226	0.806452	1.6129	2.41935	89.5161	carbonate-cemented beds
422.04	0	3.63636	12.7273	74.5455	0	0	0	0	1.81818	5.45455	1.81818	0	0	90.9091	bioturbated carbonate-rich
431.27	0	0	0	2.72727	0	0	0	42.7273	0	3.63636	7.27273	38.1818	5.45455	2.72727	bioturbated carbonate-rich
431.5	0	0	0	4.88722	0	0	0	21.0526	0.37594	34.2105	14.2857	22.1805	3.00752	4.88722	bioturbated carbonate-rich
431.71	0	0	0	24.2857	2.85714	0	0	21.4286	1.42857	27.1429	2.85714	17.1429	2.85714	27.1429	bioturbated carbonate-rich
432.02	0	0	0	0	0	0	0	45.5357	0	19.6429	3.57143	28.5714	2.67857	0	bioturbated carbonate-rich
432.76	0	0	0	0	0	0	0	36.1702	0	10.6383	14.8936	36.1702	2.12766	0	bioturbated carbonate-rich
432.96	1.92308	3.84615	0	0.961538	0	0	0	18.2692	3.84615	22.1154	10.5769	34.6154	5.76923	4.80769	bioturbated carbonate-rich
433.16	1	15	7	39	0	0	0	11	0	9	8	10	1	61	bioturbated carbonate-rich
433.7	0	0	2.12766	0	0	0	0	17.0213	2.12766	51.0638	8.51064	17.0213	2.12766	2.12766	bioturbated carbonate-rich
433.84	0	0.456621	0.913242	3.19635	0	0	0	50.2283	0	11.4155	8.6758	22.3744	2.73973	4.56621	bioturbated carbonate-rich
433.92	0	0.403226	0.403226	0	0	0	0	52.8226	0	11.2903	10.0806	22.1774	2.82258	0.806452	bioturbated carbonate-rich
433.94	0.813008	0.813008	0	0	0	0	0	52.0325	1.62602	14.6341	5.69106	22.7642	2.43902	0.813008	bioturbated carbonate-rich
434.19	0	0	2.35294	11.7647	0	0	0	29.4118	0	35.2941	4.70588	16.4706	0	14.1176	bioturbated carbonate-rich
440.53	0	0.813008	0.406504	1.21951	0	0	0	40.6504	1.62602	25.2033	5.69106	21.5447	2.84553	2.43902	bioturbated carbonate-rich
440.63	0	1.72414	0	3.44828	0	22.4138	0	27.5862	1.72414	5.17241	17.2414	17.2414	3.44828	27.5862	bioturbated carbonate-rich
440.87	0	0	1.4218	19.4313	0	0	0	14.6919	0.947867	25.1185	9.95261	26.0664	2.36967	20.8531	bioturbated carbonate-rich
441.06	0	0	0	0	0	0	0	45.7364	0	22.4806	3.10078	27.907	0.775194	0	bioturbated carbonate-rich
441.1	0	0	0	0	0	0	0	22.7723	0	21.7822	4.9505	49.505	0.990099	0	bioturbated carbonate-rich
441.12	0	0	0	0	0	0	0	30.9524	0	26.7857	4.16667	37.5	0.595238	0	bioturbated carbonate-rich
441.77	0	0	0	0	0	0	0	17.2662	0.719424	49.6403	10.7914	21.5827	0	0	bioturbated carbonate-rich
442.28	1.40845	5.6338	2.11268	69.0141	0	0	0	1.40845	0	11.9718	4.92958	4.22535	0.704225	76.7606	bioturbated carbonate-rich
442.88	0	5.37634	3.22581	82.7957	0	3.22581	0	1.07527	0	2.15054	2.15054	0	0	94.6237	bioturbated carbonate-rich
443.08	0	5	0	90	0	0	0	0	0	2.5	2.5	0	0	95	bioturbated carbonate-rich
445.49	0	0	0	0	0	14.5161	0	9.67742	4.83871	3.22581	8.06452	58.0645	1.6129	14.5161	bioturbated carbonate-rich
449.97	0	21.4612	10.0457	34.7032	0	26.9406	0	0	0	0.913242	1.36986	4.56621	0	93.1507	bioturbated carbonate-rich
452.7	0	3.21101	5.50459	31.1927	0	52.2936	0	1.37615	1.83486	3.66972	0.458716	0.458716	0	92.2018	bioturbated carbonate-rich
452.93	0.537634	3.22581	13.9785	52.6882	0	25.2688	0	0.537634	2.15054	0	0	2.15054	0	95.1613	bioturbated carbonate-rich
459.515	0	0	2.17391	43.4783	0	36.9565	0	0	4.34783	0	10.8696	2.17391	0	82.6087	bioturbated carbonate-rich
469.27	0	3.22581	2.15054	25.8065	0	58.0645	0	1.07527	5.37634	1.07527	2.15054	1.07527	0	89.2473	bioturbated carbonate-rich
480.29	0	3.57143	1.78571	25	0	35.7143	0	0	12.5	5.35714	7.14286	7.14286	1.78571	66.0714	bioturbated carbonate-rich
488.31	0	1.64835	1.0989	42.3077	0	46.7033	0	0.549451	0	0.549451	2.74725	3.2967	1.0989	91.7582	bioturbated carbonate-rich
499.46	0	1.6129	10.4839	62.9032	0	23.3871	0	0	0.806452	0.806452	0	0	0	98.3871	bioturbated carbonate-rich
500.11	0	0	1.78571	41.0714	0	50	0	0	3.57143	0	0	3.57143	0	92.8571	bioturbated carbonate-rich
507.61	0	0	8.16327	48.9796	0	32.6531	0	0	0	2.04082	2.04082	6.12245	0	89.7959	bioturbated carbonate-rich
508.99	0	2.29885	4.5977	35.6322	0	37.931	0	0	0	8.04598	5.74713	3.44828	2.29885	80.4598	bioturbated carbonate-rich
517.19	0	0	11.1111	0	0	26.6667	0	2.22222	0	8.88889	22.2222	6.66667	22.2222	37.7778	bioturbated carbonate-rich
518.19	0	1.2987	12.987	20.7792	0	15.5844	0	1.2987	11.6883	3.8961	18.1818	11.6883	2.5974	50.6494	bioturbated carbonate-rich
536.02	0	2.77778	0	17.5926	0	13.8889	0	9.25926	0.925926	2.77778	20.3704	31.4815	0.925926	34.2593	bioturbated carbonate-rich
537.3	0	0	0	17.7083	0	13.5417	0	6.25	6.25	29.1667	7.29167	19.7917	0	31.25	bioturbated carbonate-rich
545.6	0	2.38095	0	5.95238	0.595238	1.78571	0	10.119	25.5952	8.92857	33.3333	11.3095	0	10.7143	bioturbated carbonate-rich
555.18	1.08696	1.08696	7.6087	58.6957	0	32.6087	0	0	0	0	0	0	0	100	bioturbated carbonate-rich
623.99	0	6.84932	0.684932	27.3973	0	9.58904	0	0	3.42466	0	52.0548	0	0	44.5205	bioturbated carbonate-rich
632.105	0	11.1111	2.77778	25	0	58.3333	0	0	0	0	0	2.77778	0	97.2222	bioturbated carbonate-rich
680.01	0	25.5814	4.65116	55.814	0	4.65116	0	0	4.65116	0	2.32558	2.32558	0	90.6977	bioturbated carbonate-rich
685.43	0	5.06329	1.26582	20.2532	0	50.6329	3.79747	0	6.32911	2.53165	0	3.79747	6.32911	77.2152	bioturbated carbonate-rich
689.59	2.75862	19.6552	13.4483	32.069	0	32.7586	0	0	1.37931	0.689655	0	0	0	97.931	bioturbated carbonate-rich
711.56	0	4.58716	2.75229	22.9358	0	67.8899	0	0	0	0.917431	0	0	0.917431	98.1651	bioturbated carbonate-rich
719.65	0	2.5	1.66667	21.6667	0	74.1667	0	0	0	0	0	0	0	100	bioturbated carbonate-rich
723.89	0	5.26316	17.5439	15.7895	0	40.3509	0	14.0351	3.50877	0	1.75439	1.75439	0	78.9474	bioturbated carbonate-rich
728.28	0	3.57143	3.57143	29.7619	0	57.1429	0	0	0	0	1.19048	3.57143	1.19048	94.0476	pelagic clays
739.05	0	14.5161	4.83871	1.6129	0	62.9032	0	3.22581	0	9.67742	0	3.22581	0	83.871	pelagic clays
741.455	0	10.9589	5.47945	12.3288	0	63.6986	0	0	4.10959	2.73973	0.684932	0	0	92.4658	pelagic clays
751.55	1.21951	4.87805	4.87805	3.65854	0	59.7561	0	1.21951	14.6341	3.65854	1.21951	1.21951	4.87805	73.1707	pelagic clays
776.62	0	1.94175	10.6796	38.835	0	42.7184	0	0	2.91262	0.970874	0.970874	0	0.970874	94.1748	pelagic clays
777.62	0	3.87097	20	71.6129	0.645161	0.645161	0	0	0.645161	1.93548	0	0.645161	0	96.7742	pelagic clays
778.96	0.854701	3.4188	12.8205	75.2137	0	1.7094	0	0	1.7094	4.2735	0	0.854701	0	93.1624	pelagic clays
780.3	0	1.30719	10.4575	65.3595	0	15.0327	0	0	0	5.22876	1.30719	1.30719	0	92.1569	pelagic clays
795.17	0	1.76471	20.5882	58.8235	1.76471	0	0	0	0	7.64706	4.70588	3.52941	1.17647	82.9412	pelagic clays
795.56	0	6.35838	17.341	18.4971	0	29.4798	0	0.578035	15.6069	2.31214	4.04624	4.62428	1.15607	71.6763	pelagic clays
795.73	0	2.77778	34.2593	56.0185	0.462963	0.462963	0	1.85185	0	1.38889	1.38889	0.925926	0.462963	93.9815	laminated siltstones
795.91	0	1.79372	27.3543	62.3318	0.896861	0	0	0.44843	0	2.24215	0	3.13901	1.79372	92.3767	laminated siltstones
796.12	0	1.75439	19.2982	28.9474	0	0	0	11.4035	5.26316	4.38596	23.6842	4.38596	0.877193	50	laminated siltstones
796.32	0	2.43902	10.9756	75.6098	0	0	0	1.21951	1.21951	3.65854	2.43902	2.43902	0	89.0244	laminated siltstones
796.53	0	2.71739	34.7826	53.2609	0.543478	0	0	0	2.71739	4.34783	0	1.08696	0.543478	91.3043	laminated siltstones
796.69	0	2.91262	25.2427	64.0777	1.45631	0	0	0	1.45631	2.42718	0.970874	0.485437	0.970874	93.6893	laminated siltstones
796.9	0.518135	16.5803	46.114	11.399	0	17.0984	0	0	1.03627	1.03627	0	5.69948	1.03627	91.1917	laminated siltstones
797.12	0	6.25	16.25	40	2.5	0	0	0	2.5	7.5	13.75	10	1.25	65	laminated siltstones
797.31	0.666667	2	20	69.3333	0.666667	0	0	0.666667	2	0	2	3.33333	0	92	laminated siltstones
797.51	0	2.06897	27.2414	57.931	0	6.55172	0	0.344828	0	1.72414	1.72414	1.37931	1.03448	93.7931	laminated siltstones
797.71	0	4.36508	26.5873	46.4286	0	7.53968	0	0.396825	2.77778	9.12698	0.396825	0.793651	1.5873	84.9206	laminated siltstones
797.91	0	3.43511	25.9542	46.5649	0.381679	5.72519	0	0	2.29008	14.5038	0.763359	0	0.381679	82.0611	laminated siltstones
798.02	0	5.40541	19.8198	58.5586	2.7027	0	0	0	0	4.5045	5.40541	3.6036	0	86.4865	laminated siltstones
798.21	0	3.4188	36.7521	50.4274	0	4.2735	0	0	0	3.4188	0	0.854701	0.854701	94.8718	laminated siltstones
798.62	0	3.52941	40	46.2745	0.392157	2.35294	0	0	0	6.27451	0	0.392157	0.784314	92.549	laminated siltstones
799.02	0	3.77358	23.7736	65.283	0.377358	4.5283	0	0	0	0.377358	0.377358	1.13208	0.377358	97.7358	laminated siltstones
799.22	0	9.01288	37.3391	46.3519	0.429185	1.28755	0	1.28755	0.429185	0.429185	0.858369	0.858369	1.71674	94.4206	laminated siltstones
799.42	0	9.92366	37.7863	32.4427	10.3053	6.10687	0	0	0	0.763359	0	1.52672	1.14504	96.5649	laminated siltstones
799.51	0	7.22892	21.6867	59.4378	0	6.82731	0	0	0.401606	2.00803	0.803213	0.803213	0.803213	95.1807	laminated siltstones
799.71	0	9.43396	23.8994	55.3459	0.628931	5.03145	0	0	0	1.88679	1.88679	1.25786	0.628931	94.3396	laminated siltstones
799.91	0	6.73077	30.7692	26.9231	0	27.8846	0	0	5.76923	0	0	1.92308	0	92.3077	laminated siltstones
800.1	0	0	34.0741	50.3704	2.22222	2.96296	0	0	0	5.18519	1.48148	2.96296	0.740741	89.6296	laminated siltstones
800.31	0	7.26257	31.8436	8.93855	1.67598	37.9888	0	0.558659	1.11732	5.02793	1.67598	2.23464	1.67598	87.7095	laminated siltstones
800.51	0	9.63303	32.1101	16.055	5.04587	24.3119	0	0.917431	0	5.9633	0.917431	2.75229	2.29358	87.156	laminated siltstones
800.71	0.462963	7.40741	30.0926	18.0556	0.462963	30.0926	0.462963	3.24074	0	3.7037	0.462963	3.24074	2.77778	86.1111	laminated siltstones
800.91	1.37615	5.9633	18.3486	37.6147	0	23.8532	0	1.83486	0	5.04587	0.917431	3.66972	2.75229	85.7798	laminated siltstones
801.01	0.947867	4.73934	18.4834	36.019	0.947867	21.327	0	2.36967	1.4218	2.8436	0.473934	4.73934	6.63507	81.5166	laminated siltstones
801.21	0.507614	7.1066	46.7005	9.13706	3.04569	24.3655	0.507614	1.52284	0	1.01523	3.04569	0.507614	3.04569	90.3553	laminated siltstones
801.41	0	4.04624	28.9017	7.51445	0.578035	49.711	0	0.578035	2.31214	1.7341	3.46821	1.15607	0	90.7514	laminated siltstones
801.6	0	10.4265	52.1327	26.5403	0.947867	5.21327	0	0	0	0.947867	0.473934	0.947867	2.36967	95.2607	laminated siltstones
801.81	0	9.6	45.2	25.6	2	6.4	0	0.4	1.2	3.6	2.8	1.6	1.6	88.8	laminated siltstones
802.01	0	8.92857	42.4107	32.1429	3.125	0.446429	0	0.446429	1.33929	4.91071	2.67857	2.67857	0.892857	87.0536	laminated siltstones
802.21	0	11.25	47.9167	28.3333	0.833333	0.833333	0	0	1.66667	5	2.91667	0.833333	0.416667	89.1667	laminated siltstones
802.41	0	13.2296	28.7938	31.1284	3.11284	6.61479	0	0	5.05837	8.56031	0.77821	0.77821	1.94553	82.8794	laminated sandstones
802.49	0	7.45098	25.8824	2.7451	7.05882	34.902	0	1.17647	0	13.7255	2.7451	2.35294	1.96078	78.0392	laminated sandstones
802.69	0	13.0282	35.9155	17.9577	3.16901	19.0141	0.352113	0.352113	0.352113	6.69014	1.40845	0.352113	1.40845	89.0845	laminated sandstones
802.89	0.947867	11.3744	63.0332	10.9005	0.473934	10.4265	0	0	2.36967	0.473934	0	0.947867	0	96.2085	laminated sandstones
803.08	0	12.2605	38.3142	28.7356	2.29885	12.6437	0	1.14943	0.383142	1.53257	1.14943	0.766284	0.766284	94.2529	laminated sandstones
803.29	0	8.33333	25	25	2.38095	25.7937	0	1.19048	0	9.12698	1.19048	0.396825	1.5873	86.5079	laminated sandstones
803.49	0	7.22892	36.5462	18.8755	0	26.1044	0	0	0	4.81928	2.81124	1.60643	2.00803	88.755	mass-waste deposits
803.6	0.395257	10.6719	17.3913	19.7628	1.18577	39.1304	0	1.18577	0.395257	1.58103	3.55731	1.97628	3.16206	88.1423	mass-waste deposits
803.8	0	11.0656	11.8852	14.3443	1.63934	51.6393	0	0.819672	1.22951	0.409836	3.27869	2.04918	1.63934	90.5738	mass-waste deposits
804	3.31492	7.73481	41.4365	26.5193	1.10497	9.39227	0	0.552486	3.8674	2.76243	3.31492	2.20994	1.10497	86.1878	mass-waste deposits
804.2	0	9.54545	19.5455	21.8182	0	29.0909	0	2.27273	0.909091	5.90909	4.54545	3.18182	3.18182	80	mass-waste deposits
804.92	0	5.47945	17.8082	47.9452	0	0	0	8.21918	0	10.9589	1.36986	6.84932	1.36986	71.2329	mass-waste deposits
805.52	0	5.40541	29.0541	44.5946	0	10.8108	0	2.02703	0.675676	0	4.05405	1.35135	2.02703	89.8649	mass-waste deposits
806.2	2.85714	10.9524	12.8571	71.4286	0	0.952381	0	0	0	2.38095	0	1.42857	0	96.1905	mass-waste deposits
806.43	0.456621	5.02283	49.7717	32.8767	1.36986	10.0457	0	0	0.456621	0	0	0.456621	0	99.0868	mass-waste deposits
806.56	1.28755	7.29614	13.3047	75.5365	0	0	0	0.429185	0	0.858369	0	2.14592	0.429185	96.1373	mass-waste deposits
806.96	0.440529	3.96476	14.5374	80.6167	0	0	0	0	0	0	0.440529	0.440529	0	99.1189	mass-waste deposits
807.01	0.490196	14.2157	15.6863	68.6275	0	0	0	0	0	0	0.490196	0	0.980392	98.5294	mass-waste deposits
807.21	0	8.66426	19.1336	68.5921	0	0	0	1.08303	1.08303	0.361011	1.08303	0	0	96.3899	mass-waste deposits
807.41	0.632911	7.59494	40.5063	48.7342	0.632911	1.26582	0	0	0	0.632911	0.632911	0	0	98.7342	mass-waste deposits
807.61	0	10.687	17.9389	68.7023	0	1.14504	0	0	0	1.14504	0	0.381679	0	98.4733	mass-waste deposits
807.81	0	9.50413	16.9421	68.1818	0.413223	2.06612	0	0	0.413223	1.65289	0	0.826446	0	97.1074	mass-waste deposits
808.01	0.854701	14.9573	22.2222	61.5385	0	0	0	0.854701	0	0.42735	0	0	0	98.7179	mass-waste deposits
808.21	0	10.7438	21.9008	64.876	0.413223	0	0	0	0	1.23967	0.413223	0.413223	0	97.9339	mass-waste deposits
808.41	0.617284	4.01235	12.037	37.3457	0	0.308642	0	0	0	44.7531	1.23457	0.308642	0	53.7037	mass-waste deposits
808.51	0	4.19847	22.5191	45.8015	1.9084	0.763359	0	1.52672	0	20.229	1.14504	0.763359	1.14504	75.1908	mass-waste deposits
808.71	0.787402	8.66142	16.9291	44.0945	0.393701	0.393701	0	0	1.9685	24.8031	1.1811	1.1811	0.393701	70.4724	mass-waste deposits
808.91	0	3.53982	21.6814	28.3186	0	2.21239	0	0	1.32743	38.0531	1.76991	2.65487	0.442478	55.7522	mass-waste deposits
809.11	1.07143	3.92857	30	44.6429	0.357143	0	0	0.357143	0.357143	18.2143	0	1.42857	0.714286	78.9286	mass-waste deposits
809.31	0.826446	6.61157	24.7934	49.5868	0	0	0	0	0	17.7686	0	0.826446	0.413223	80.9917	mass-waste deposits
809.51	0	2.07469	19.917	59.751	0	0	0	1.24481	0	14.5228	0.829876	0.829876	0.829876	81.7427	mass-waste deposits
809.72	0	5.3719	39.6694	50	0	0	0	0.413223	0	0	0.413223	3.71901	0.413223	95.0413	mass-waste deposits
809.91	0.44843	8.96861	43.0493	39.9103	0.44843	0	0	1.34529	0	2.24215	0.896861	2.69058	0.44843	92.3767	mass-waste deposits
810.01	0.772201	4.2471	20.4633	72.2008	0.3861	0	0	0	0	1.1583	0	0.772201	0.772201	97.2973	mass-waste deposits
810.21	2.05761	9.87654	34.1564	50.6173	0	0	0	0.411523	0	0.411523	0.411523	2.46914	1.64609	94.6502	mass-waste deposits
810.415	0	1.31004	33.1878	20.9607	0	2.62009	0	1.31004	1.31004	11.3537	25.3275	2.18341	0.436681	58.0786	mass-waste deposits
810.58	0.766284	3.83142	25.6705	64.751	0.383142	0	0	1.14943	0	0	0.383142	1.53257	2.29885	94.636	mass-waste deposits
810.81	0.829876	9.12863	34.0249	50.2075	0.829876	0.829876	0	0.414938	0.829876	0.414938	0	2.90456	0.414938	95.0207	mass-waste deposits
811.01	0.458716	5.50459	36.6972	37.6147	2.29358	0.917431	0	0.917431	4.12844	4.12844	0	6.42202	1.37615	83.0275	mass-waste deposits
814.72	0.952381	2.85714	49.5238	28.5714	1.90476	5.71429	0	1.90476	0.952381	0	2.85714	4.7619	0.952381	88.5714	mass-waste deposits
816.2	0	0	56.4103	10.2564	0	7.69231	0	1.28205	3.84615	3.84615	3.84615	11.5385	1.28205	74.359	mass-waste deposits
818.4	1.5748	5.51181	48.8189	22.8346	0.787402	12.5984	0	0.787402	3.14961	1.5748	0.787402	1.5748	1.5748	90.5512	mass-waste deposits
819.75	0	1.85185	57.4074	20.3704	0	1.85185	0	0	9.25926	0	1.85185	7.40741	0	81.4815	mass-waste deposits
821.06	4	6	45	26	0	17	0	0	2	0	2	1	1	94	mass-waste deposits
822.2	0.826446	2.47934	67.7686	18.1818	0.826446	6.61157	0	0	0	0	0	4.13223	0	95.8678	mass-waste deposits
824.32	11.1111	12.5926	58.5185	20	1.48148	5.18519	0	0	1.48148	0	0	0.740741	0	97.7778	mass-waste deposits
825.83	0	4.87805	14.6341	19.5122	2.43902	12.1951	0	7.31707	21.9512	0	4.87805	7.31707	4.87805	53.6585	mass-waste deposits
827.34	1.75439	9.64912	50	20.1754	1.75439	4.38596	0	2.63158	5.26316	1.75439	0	2.63158	1.75439	85.9649	mass-waste deposits
828.49	4.9505	7.92079	38.6139	32.6733	0	7.92079	0	0	2.9703	0.990099	1.9802	1.9802	4.9505	87.1287	mass-waste deposits
829.99	0	3.125	79.6875	9.375	1.5625	3.90625	0	0	0	0	0.78125	0.78125	0.78125	97.6562	mass-waste deposits
831.49	1.92308	6.73077	33.6538	50	4.80769	0	0	0	1.92308	0	0	0.961538	1.92308	95.1923	mass-waste deposits
832.68	4.41176	7.35294	32.3529	54.4118	4.41176	1.47059	0	0	0	0	0	0	0	100	mass-waste deposits
834.13	0.588235	8.23529	40.5882	37.0588	2.94118	1.17647	0	2.35294	2.35294	0	2.94118	2.35294	0	90	mass-waste deposits
835.86	1.47059	12.5	23.5294	55.1471	3.67647	2.94118	0	0	0	0	0.735294	0.735294	0.735294	97.7941	mass-waste deposits
843.56	0.862069	5.17241	37.5	21.9828	0	30.1724	0	1.2931	0	2.15517	0.431034	0.862069	0.431034	94.8276	mass-waste deposits
844.82	3.96825	15.873	38.8889	42.8571	0.793651	0.793651	0	0	0	0	0	0	0.793651	99.2063	mass-waste deposits
846.13	0	1.55039	26.3566	61.2403	8.52713	0	0	0	0.775194	0	0	1.55039	0	97.6744	mass-waste deposits
847.42	1.89873	3.16456	25.3165	54.4304	8.86076	3.16456	0	0	0	0	0	3.16456	1.89873	94.9367	mass-waste deposits
848.65	0	1.96078	15.6863	63.7255	2.94118	11.7647	0	0.980392	0.980392	0	0	0.980392	0.980392	96.0784	mass-waste deposits
864.66	11.3744	14.218	33.6493	32.2275	11.8483	2.8436	0	0	0	0	0	5.21327	0	94.7867	mass-waste deposits
866.76	10.219	10.219	36.4964	27.7372	12.4088	11.6788	0	0	0	0	0	1.45985	0	98.5401	mass-waste deposits
866.82	8.58209	10.0746	25.3731	35.8209	10.4478	16.791	0	0	0	0	0	0.746269	0.746269	98.5075	mass-waste deposits
869.725	18.3099	18.3099	31.6901	15.493	31.6901	0	0	0	0	0	0	2.8169	0	97.1831	mass-waste deposits
872.56	3.86266	4.72103	29.8283	40.3433	21.2446	0.643777	0	1.28755	0	0	0	0.429185	1.50215	96.7811	mass-waste deposits
873.52	4.46429	4.46429	32.1429	50	6.25	2.67857	0	0.892857	0.892857	0	0	2.67857	0	95.5357	mass-waste deposits
873.92	2.20588	5.14706	25.7353	52.2059	7.35294	0.735294	0	0	0	0	0	8.08824	0.735294	91.1765	mass-waste deposits
874.48	1.94175	1.94175	8.25243	60.1942	15.534	4.36893	0	0	0	0	0	9.70874	0	90.2913	mass-waste deposits
876.68	4.62428	4.62428	5.20231	52.0231	15.0289	21.3873	0	0	0	0	0	1.7341	0	98.2659	mass-waste deposits
877.06	3.31492	5.52486	9.94475	45.3039	23.2044	7.73481	0	0	0	0	0	3.8674	4.41989	91.7127	mass-waste deposits
877.26	10.101	18.1818	2.0202	40.404	28.2828	4.0404	0	0	4.0404	0	0	3.0303	0	92.9293	mass-waste deposits
877.66	7.2	12	11.2	49.6	19.2	0	0	0	6.4	0	0	1.6	0	92	mass-waste deposits
878.01	6.09756	8.53659	7.31707	43.9024	24.3902	4.26829	0	0	6.09756	0	0	3.65854	1.82927	88.4146	mass-waste deposits
878.41	3.36134	7.56303	8.82353	15.1261	14.2857	10.084	0	0	25.2101	0	0	17.2269	1.68067	55.8824	mass-waste deposits
879.51	4.16667	4.86111	12.1528	41.6667	30.2083	1.73611	0	0.694444	0.694444	1.38889	0	3.125	3.47222	90.625	mass-waste deposits
880.1	2.42424	4.84848	8.48485	31.5152	23.6364	0	0	0	0	1.21212	0	13.3333	16.9697	68.4848	mass-waste deposits
882.43	1.90476	9.52381	17.1429	49.5238	17.1429	0	0	0	1.90476	0	0	4.7619	0	93.3333	mass-waste deposits
882.86	1.17647	4.70588	3.52941	32.9412	15.2941	1.17647	0	0	0	1.17647	1.17647	15.2941	24.7059	57.6471	mass-waste deposits
882.96	15.0538	16.8459	15.9498	42.2939	9.319	5.19713	0	0	0	0	0.358423	8.24373	1.79211	89.6057	mass-waste deposits
883.3	1.85185	6.79012	11.1111	17.284	13.5802	2.46914	0	0	1.23457	2.46914	0	19.1358	25.9259	51.2346	mass-waste deposits
883.73	0	0	0	0	0	0	1.96078	0	1.96078	0	0	10.7843	85.2941	0	mass-waste deposits
884.57	7.2	8.8	18	33.6	27.2	0	0	0.8	1.6	0	0	3.2	6.8	87.6	mass-waste deposits
885.57	8.36237	9.05923	9.05923	29.2683	29.2683	0	0	0	0	0	0	12.892	10.453	76.6551	glauconitic sandstones
885.69	14.9733	16.0428	13.369	26.738	13.9037	3.20856	0	0	3.20856	0	0	7.48663	16.0428	73.262	glauconitic sandstones
886.09	5.76132	9.0535	9.87654	32.9218	24.6914	3.29218	0	0	0.823045	0	0	10.2881	9.0535	79.8354	glauconitic sandstones
886.29	3.59281	9.58084	9.58084	17.9641	35.9281	0	0	1.1976	9.58084	0	0	4.19162	11.976	73.0539	glauconitic sandstones
886.49	0	3.125	15.625	15.625	27.3438	0	0	0	4.6875	0	0	11.7188	21.875	61.7188	glauconitic sandstones
891.255	4.0404	5.05051	20.202	29.2929	30.8081	2.0202	0	0	1.0101	0	0	10.6061	1.0101	87.3737	glauconitic sandstones
891.655	13.3333	17.7778	31.1111	8.88889	12.2222	2.22222	0	0	4.44444	2.22222	0	16.6667	4.44444	72.2222	glauconitic sandstones
892.455	9.15033	10.4575	22.8758	33.9869	5.22876	2.61438	0	1.30719	5.22876	0	0	14.3791	3.92157	75.1634	glauconitic sandstones
892.735	8	9.33333	12.6667	36	10.6667	0	0	0	1.33333	0	0	20.6667	9.33333	68.6667	glauconitic sandstones
893.1	3.10078	3.10078	15.5039	31.0078	10.0775	0	0	1.55039	1.55039	0	0	10.8527	26.3566	59.6899	glauconitic sandstones
averages	8.86682	19.7925	2.24042	18.7263	0	4.38679	0.163399	8.47024	11.0999	6.46029	12.2865	7.74612	8.62763	45.146	miocene deposits
	0.437439	1.98383	5.43901	42.7461	0	8.0121	0	5.84871	5.14778	3.32641	5.91577	13.9869	7.59336	58.1811	carbonate-cemented beds
	0.194444	3.4921	3.48892	24.7488	0.0704568	18.5412	0.0774994	13.3927	2.35548	10.8536	7.43958	13.8144	1.72531	50.3415	bioturbated carbonate-rich
	0.207421	5.25863	11.0655	37.5704	0.240987	33.3086	0	0.502335	3.96179	3.84435	1.41251	1.89775	0.937194	87.4441	pelagic clays
	0.139981	5.97305	30.62	40.4141	1.31767	10.0848	0.0303305	0.863625	1.15368	3.61228	2.38662	2.26303	1.2808	88.4096	laminated siltstones
	0.157978	10.9462	36.1565	19.4112	3.0824	18.2325	0.0586854	0.644747	1.36055	6.6849	1.21194	0.932373	1.27806	87.8287	laminated sandstones
	2.52126	7.2441	27.0342	41.0318	5.85367	5.65424	0.0261438	0.650113	1.67856	3.33012	1.12278	3.34151	3.03276	86.818	mass-waste deposits
	7.03146	9.25813	15.987	26.1694	20.0139	1.33575	0	0.405518	3.1867	0.222222	0	11.9748	11.4466	72.7641	glauconitic sandstones
stdev	4.73645	10.2123	4.62481	29.4793	0		0.67371	12.2779	9.42233	4.89889	13.2795	15.8761	9.5707	38.2738	miocene deposits
	0.809217	6.00994	2.85774	16.3647	1.16642	0	0	12.7604	1.52665	9.64306	5.16447	10.2409	1.58121	24.122	carbonate-cemented beds
	0.508383	5.68616	5.21209	25.3381	0.124092	23.6186	0.542495	15.6864	4.72107	12.5136	9.60716	13.5318	3.34936	38.626	bioturbated carbonate-rich
	0.163849	4.56671	10.6261	21.2399	0.881039	10.2217	0	3.5192	4.72337	2.33379	7.72725	2.82364	0.495349	15.0133	pelagic clays
	0.342984	3.32595	10.6216	17.4319	2.26274	13.6005	0.132143	0.803479	1.45966	3.65538	1.3209	1.14177	1.31442	4.88924	laminated siltstones
	1.60018	2.56374	11.2869	21.0372	0.728451	19.9438	0	3.02145	1.43601	4.11577	1.73144	2.06987	1.05179	8.8676	laminated sandstones
	4.1907	4.44778	16.0968	18.1522	10.3856	5.52731	0.226412	1.01398	4.18804	8.11335	3.01609	4.79387	11.0227	16.8069	mass-waste deposits
	3.48007	5.47257	12.4241	9.36499	4.35862	10.7869	0.0543902	4.69476	3.23086	3.40614	4.17632	6.88057	8.12403	17.6605	glauconitic sandstones
min	4.13036	9.58023	-2.38439	-10.753	0	4.38679	-0.510311	-3.8077	1.67752	1.5614	-0.993019	-8.12998	-0.943063	6.87216	miocene deposits
	-0.371778	-4.02611	2.58128	26.3815	-1.16642	8.0121	0	-6.91168	3.62112	-6.31665	0.751299	3.74603	6.01215	34.059	carbonate-cemented beds
	-0.313939	-2.19406	-1.72317	-0.589275	-0.0536351	-5.07746	-0.464996	-2.29371	-2.36558	-1.66007	-2.16757	0.282653	-1.62404	11.7155	bioturbated carbonate-rich
	0.0435727	0.691925	0.439345	16.3305	-0.640052	23.087	0	-3.01686	-0.761583	1.51056	-6.31474	-0.925895	0.441845	72.4308	pelagic clays
	-0.203003	2.6471	19.9984	22.9821	-0.945069	-3.51569	-0.101813	0.0601459	-0.305982	-0.0431015	1.06572	1.12127	-0.033618	83.5204	laminated siltstones
	-1.4422	8.38243	24.8696	-1.62594	2.35395	-1.71138	0.0586854	-2.3767	-0.0754658	2.56914	-0.5195	-1.1375	0.226271	78.9611	laminated sandstones
	-1.66944	2.79633	10.9374	22.8796	-4.53193	0.126929	-0.200268	-0.363869	-2.50948	-4.78323	-1.8933	-1.45236	-7.98998	70.0111	mass-waste deposits
	3.55139	3.78555	3.56287	16.8044	15.6552	-9.45117	-0.0543902	-4.28924	-0.0441664	-3.18392	-4.17632	5.09425	3.3226	55.1036	glauconitic sandstones
max	13.6033	30.0048	6.86524	48.2056	0	4.38679	0.837109	20.7482	20.5222	11.3592	25.566	23.6222	18.1983	83.4198	miocene deposits
	1.24666	7.99376	8.29675	59.1108	1.16642	8.0121	0	18.6091	6.67443	12.9695	11.0802	24.2278	9.17457	82.3031	carbonate-cemented beds
	0.702827	9.17826	8.70101	50.087	0.194549	42.1598	0.619995	29.079	7.07655	23.3672	17.0467	27.3462	5.07467	88.9675	bioturbated carbonate-rich
	0.37127	9.82534	21.6916	58.8103	1.12203	43.5303	0	4.02153	8.68515	6.17814	9.13976	4.72139	1.43254	102.457	pelagic clays
	0.482965	9.299	41.2417	57.846	3.58041	23.6853	0.162474	1.6671	2.61334	7.26766	3.70752	3.4048	2.59522	93.2989	laminated siltstones
	1.75816	13.5099	47.4434	40.4484	3.81085	38.1763	0.0586854	3.66619	2.79656	10.8007	2.94339	3.00225	2.32984	96.6963	laminated sandstones
	6.71196	11.6919	43.131	59.184	16.2393	11.1815	0.252556	1.6641	5.86659	11.4435	4.13887	8.13538	14.0555	103.625	mass-waste deposits
	10.5115	14.7307	28.4111	35.5344	24.3725	12.1227	0.0543902	5.10028	6.41756	3.62837	4.17632	18.8554	19.5707	90.4246	glauconitic sandstones

## Sheet: paly groups and litho
mid-depth	A reworked dinos	A in situ dinos	A Acritarchs	A pollen	A total	R reworked dinos	R in situ dinos	R Acritarchs	R pollen	lithology			mid-depth	A reworked dinos	A in situ dinos	A Acritarchs	A pollen	A total	R reworked dinos	R in situ dinos	R Acritarchs	R pollen	lithology		mid-depth	A reworked dinos	A in situ dinos	A Acritarchs	A pollen	A total	R reworked dinos	R in situ dinos	R Acritarchs	R pollen	lithology		mid-depth	A reworked dinos	A in situ dinos	A Acritarchs	A pollen	A total	R reworked dinos	R in situ dinos	R Acritarchs	R pollen	lithology		mid-depth
95.61	61.1681	292.248	183.504	61.1681	598.088	10.2273	48.8636	30.6818	10.2273	Miocene			95.61	61.1681	292.248	183.504	61.1681	598.088	10.2273	48.8636	30.6818	10.2273	Miocene		797.12	1.43896	115.117	27.3403	12.9507	156.847	0.917431	73.3945	17.4312	8.25688	Carbonate cemented beds		440.63	15.6864	160.785	3771.92	21.5687	3969.96	0.395127	4.05005	95.0115	0.543299	Bioturbated carbonate-rice		431.27
106.61	6.25808	369.227	25.0323	50.0647	450.582	1.38889	81.9444	5.55556	11.1111	Miocene			106.61	6.25808	369.227	25.0323	50.0647	450.582	1.38889	81.9444	5.55556	11.1111	Miocene		802.41	41.9212	513.035	227.572	11.9775	794.506	5.27638	64.5729	28.6432	1.50754	Carbonate cemented beds		440.53	5.60091	108.284	2468.13	7.46788	2589.49	0.216294	4.18169	95.3136	0.288392	Bioturbated carbonate-rice		431.5
114.71	10.7556	14.3408	0	0	25.0965	42.8571	57.1429	0	0	Miocene			114.71	10.7556	14.3408	0	0	25.0965	42.8571	57.1429	0	0	Miocene		802.49	75.9753	523.613	279.26	12.3203	891.169	8.52535	58.7558	31.3364	1.38249	Carbonate cemented beds		441.77	5.72439	159.138	2819.83	34.3463	3019.04	0.189609	5.27114	93.4016	1.13766	Bioturbated carbonate-rice		432.02
116.41	5.92694	124.466	2.96347	0	133.356	4.44444	93.3333	2.22222	0	Miocene			116.41	5.92694	124.466	2.96347	0	133.356	4.44444	93.3333	2.22222	0	Miocene		802.69	66.7652	702.271	123.639	29.6734	922.349	7.23861	76.1394	13.4048	3.21716	Carbonate cemented beds		441.93	0	68.4918	214.256	33.3678	316.116	0	21.6667	67.7778	10.5556	Bioturbated carbonate-rice		432.42
124.31	0	0	0	0	0	0	0	0	0	Miocene			124.31	0	0	0	0	0	0	0	0	0	Miocene		803.29	13.236	476.495	270.392	28.3628	788.486	1.67866	60.4317	34.2926	3.59712	Carbonate cemented beds		442.28	0.464328	65.9345	205.233	53.3977	325.029	0.142857	20.2857	63.1429	16.4286	Bioturbated carbonate-rice		432.76
127.31	0	167.499	9.66339	6.44226	183.604	0	91.2281	5.26316	3.50877	Miocene			127.31	0	167.499	9.66339	6.44226	183.604	0	91.2281	5.26316	3.50877	Miocene		825.83	74.952	256.086	424.728	24.984	780.75	9.6	32.8	54.4	3.2	Carbonate cemented beds		444.19	0	58.1459	171.207	9.69099	239.044	0	24.3243	71.6216	4.05405	Bioturbated carbonate-rice		432.96
129.81	2.18747	146.561	13.1248	12.0311	173.904	1.25786	84.2767	7.54717	6.91824	Miocene			129.81	2.18747	146.561	13.1248	12.0311	173.904	1.25786	84.2767	7.54717	6.91824	Miocene														445.49	3.88354	80.2599	886.742	3.88354	974.769	0.398406	8.23373	90.9695	0.398406	Bioturbated carbonate-rice		433.7
135.51	0	0	0	0	0	0	0	0	0	Miocene			135.51	0	0	0	0	0	0	0	0	0	Miocene		average	45.7148	431.103	225.489	20.0448	722.351	5.5394	61.0157	29.918	3.52686	Carbonate cemented beds		452.7	32.6874	593.82	136.197	43.5831	806.288	4.05405	73.6486	16.8919	5.40541	Bioturbated carbonate-rice		433.84
138.51	64.9535	62.001	32.4767	0	159.431	40.7407	38.8889	20.3704	0	Miocene			138.51	64.9535	62.001	32.4767	0	159.431	40.7407	38.8889	20.3704	0	Miocene		stdev	32.3828	210.4	137.291	8.50143	283.296	3.59524	15.4673	14.4965	2.50027	Carbonate cemented beds		452.93	0	376.012	70.7549	18.1941	464.961	0	80.8696	15.2174	3.91304	Bioturbated carbonate-rice		433.92
141.01	71.7974	163.176	42.4257	0	277.399	25.8824	58.8235	15.2941	0	Miocene			141.01	71.7974	163.176	42.4257	0	277.399	25.8824	58.8235	15.2941	0	Miocene		min	13.3319	220.703	88.1974	11.5434	439.055	1.94416	45.5484	15.4215	1.02659	Carbonate cemented beds		480.29	50.0856	84.9937	65.263	9.10647	209.449	23.913	40.5797	31.1594	4.34783	Bioturbated carbonate-rice		433.94
153.21	22.9456	95.6067	38.2427	11.4728	168.268	13.6364	56.8182	22.7273	6.81818	Miocene			153.21	22.9456	95.6067	38.2427	11.4728	168.268	13.6364	56.8182	22.7273	6.81818	Miocene		max	78.0976	641.503	362.78	28.5462	1005.65	9.13464	76.483	44.4146	6.02714	Carbonate cemented beds		603.18	0	0	0	0	0	0	0	0	0	Bioturbated carbonate-rice		434.11
156.21	16.335	281.779	159.267	0	457.381	3.57143	61.6071	34.8214	0	Miocene			156.21	16.335	281.779	159.267	0	457.381	3.57143	61.6071	34.8214	0	Miocene														632.105	0	161.284	6.72019	6.72019	174.725	0	92.3077	3.84615	3.84615	Bioturbated carbonate-rice		434.19
165.72	28.4505	234.716	67.5699	32.0068	362.744	7.84314	64.7059	18.6275	8.82353	Miocene			165.72	28.4505	234.716	67.5699	32.0068	362.744	7.84314	64.7059	18.6275	8.82353	Miocene														645.73	0	0	0	0	0	0	0	0	0	Bioturbated carbonate-rice
173.81	13.364	111.366	0	8.90931	133.64	10	83.3333	0	6.66667	Miocene			173.81	13.364	111.366	0	8.90931	133.64	10	83.3333	0	6.66667	Miocene		average	42.3818	375.927	203.439	17.1589	612.587	5.05336	49.6286	26.0627	3.27022	Carbonate cemented beds		647.92	0	0	0	0	0	0	0	0	0	Bioturbated carbonate-rice		average
175.31	0	0	0	0	0	0	0	0	0	Miocene			175.31	0	0	0	0	0	0	0	0	0	Miocene														651.19	0	0	0	0	0	0	0	0	0	Bioturbated carbonate-rice		stdev
178.32	29.6825	126.15	0	0	155.833	19.0476	80.9524	0	0	Miocene			178.32	29.6825	126.15	0	0	155.833	19.0476	80.9524	0	0	Miocene														671.54	27.7453	91.5596	915.596	24.9708	1059.87	2.6178	8.63874	86.3874	2.35602	Bioturbated carbonate-rice		min
183.41	3.39511	152.78	50.9266	78.0875	285.189	1.19048	53.5714	17.8571	27.381	Miocene			183.41	3.39511	152.78	50.9266	78.0875	285.189	1.19048	53.5714	17.8571	27.381	Miocene														674.31	10.082	100.82	342.787	30.2459	483.934	2.08333	20.8333	70.8333	6.25	Bioturbated carbonate-rice		max
193.01	2.47778	203.178	24.7778	0	230.433	1.07527	88.172	10.7527	0	Miocene			193.01	2.47778	203.178	24.7778	0	230.433	1.07527	88.172	10.7527	0	Miocene														682.81	56.7327	85.0991	924.743	11.3465	1077.92	5.26316	7.89474	85.7895	1.05263	Bioturbated carbonate-rice
202.61	0	95.6687	20.5004	10.2502	126.419	0	75.6757	16.2162	8.10811	Miocene			202.61	0	95.6687	20.5004	10.2502	126.419	0	75.6757	16.2162	8.10811	Miocene														693.86	3.02153	51.3659	33.2368	0	87.6242	3.44828	58.6207	37.931	0	Bioturbated carbonate-rice
221.52	13.2279	61.7301	35.2744	15.4325	125.665	10.5263	49.1228	28.0702	12.2807	Miocene			221.52	13.2279	61.7301	35.2744	15.4325	125.665	10.5263	49.1228	28.0702	12.2807	Miocene														722.38	0	45.203	22.6015	0	67.8045	0	66.6667	33.3333	0	Bioturbated carbonate-rice
277.69	0	0	0	0	0	0	0	0	0	Miocene			277.69	0	0	0	0	0	0	0	0	0	Miocene														723.89	24.862	202.448	3.55172	63.9309	294.792	8.43373	68.6747	1.20482	21.6867	Bioturbated carbonate-rice
282.21	7.38997	177.359	9.8533	0	194.603	3.79747	91.1392	5.06329	0	Miocene			282.21	7.38997	177.359	9.8533	0	194.603	3.79747	91.1392	5.06329	0	Miocene														739.05	13.1753	136.145	81.248	15.3712	245.94	5.35714	55.3571	33.0357	6.25	Bioturbated carbonate-rice
284.61	8.68404	60.7883	0	0	69.4723	12.5	87.5	0	0	Miocene			284.61	8.68404	60.7883	0	0	69.4723	12.5	87.5	0	0	Miocene														741.455	9.73858	355.458	4.86929	58.4315	428.497	2.27273	82.9545	1.13636	13.6364	Bioturbated carbonate-rice
316.18	7.24966	482.102	7.24966	9.06207	505.663	1.43369	95.3405	1.43369	1.79211	Miocene			316.18	7.24966	482.102	7.24966	9.06207	505.663	1.43369	95.3405	1.43369	1.79211	Miocene														747.19	30.3857	34.7265	4.34081	10.852	80.3049	37.8378	43.2432	5.40541	13.5135	Bioturbated carbonate-rice
320.11	38.9024	525.182	149.126	200.996	914.206	4.25532	57.4468	16.3121	21.9858	Miocene			320.11	38.9024	525.182	149.126	200.996	914.206	4.25532	57.4468	16.3121	21.9858	Miocene														751.55	40.2509	275.048	3.35424	33.5424	352.195	11.4286	78.0952	0.952381	9.52381	Bioturbated carbonate-rice
327.21	6.32831	496.773	101.253	49.0444	653.398	0.968523	76.0291	15.4964	7.50605	Miocene			327.21	6.32831	496.773	101.253	49.0444	653.398	0.968523	76.0291	15.4964	7.50605	Miocene														753.015	0	0	0	0	0	0	0	0	0	Bioturbated carbonate-rice
330.21	0	0	0	0	0	0	0	0	0	Miocene			330.21	0	0	0	0	0	0	0	0	0	Miocene														777.62	36.113	466.46	33.1036	63.1978	598.874	6.03015	77.8894	5.52764	10.5528	Bioturbated carbonate-rice
363.81	3.57539	107.262	1741.21	3.57539	1855.63	0.192678	5.78035	93.8343	0.192678	Miocene			363.81	3.57539	107.262	1741.21	3.57539	1855.63	0.192678	5.78035	93.8343	0.192678	Miocene														781.54	44.9239	106.184	49.0079	28.5879	228.703	19.6429	46.4286	21.4286	12.5	Bioturbated carbonate-rice
374.9	69.7649	279.06	1529.01	5.81375	1883.65	3.7037	14.8148	81.1728	0.308642	Miocene			374.9	69.7649	279.06	1529.01	5.81375	1883.65	3.7037	14.8148	81.1728	0.308642	Miocene														796.9	29.9165	824.84	17.0951	29.9165	901.768	3.31754	91.4692	1.89573	3.31754	Bioturbated carbonate-rice
797.12	1.43896	115.117	27.3403	12.9507	156.847	0.917431	73.3945	17.4312	8.25688	carbonate-cemented beds																											797.31	19.1057	716.464	214.939	23.8821	974.391	1.96078	73.5294	22.0588	2.45098	Bioturbated carbonate-rice
802.41	41.9212	513.035	227.572	11.9775	794.506	5.27638	64.5729	28.6432	1.50754	carbonate-cemented beds			average	17.0628	166.587	146.326	19.1157	349.092	7.60485	55.0521	15.4938	4.60789	Miocene														801.01	22.9085	302.106	25.7721	51.5442	402.331	5.69395	75.089	6.40569	12.8114	Bioturbated carbonate-rice
802.49	75.9753	523.613	279.26	12.3203	891.169	8.52535	58.7558	31.3364	1.38249	carbonate-cemented beds			stdev	22.6291	151.392	416.41	40.7286	475.899	11.4316	33.5216	22.5502	6.9452	Miocene														801.21	89.7723	982.508	364.077	24.9367	1461.29	6.14334	67.2355	24.9147	1.70648	Bioturbated carbonate-rice
802.69	66.7652	702.271	123.639	29.6734	922.349	7.23861	76.1394	13.4048	3.21716	carbonate-cemented beds			min	-5.56633	15.1952	-270.084	-21.6129	-126.807	-3.82671	21.5305	-7.05642	-2.33731	Miocene														801.41	103.167	892.393	149.592	15.475	1160.63	8.88889	76.8889	12.8889	1.33333	Bioturbated carbonate-rice
803.29	13.236	476.495	270.392	28.3628	788.486	1.67866	60.4317	34.2926	3.59712	carbonate-cemented beds			max	39.6919	317.978	562.736	59.8444	824.99	19.0364	88.5737	38.044	11.5531	Miocene														801.6	60.0752	745.639	236.767	38.8722	1081.35	5.55556	68.9542	21.8954	3.59477	Bioturbated carbonate-rice
825.83	74.952	256.086	424.728	24.984	780.75	9.6	32.8	54.4	3.2	carbonate-cemented beds																											801.81	75.0177	1041.91	358.418	62.5148	1537.86	4.87805	67.7507	23.3062	4.06504	Bioturbated carbonate-rice
440.63	15.6864	160.785	3771.92	21.5687	3969.96	0.395127	4.05005	95.0115	0.543299	bioturbated carbonate-rich																											802.01	86.2545	1016.89	240.605	18.1588	1361.91	6.33333	74.6667	17.6667	1.33333	Bioturbated carbonate-rice
440.53	5.60091	108.284	2468.13	7.46788	2589.49	0.216294	4.18169	95.3136	0.288392	bioturbated carbonate-rich																											802.21	69.2917	1187.86	356.357	34.6459	1648.15	4.2042	72.0721	21.6216	2.1021	Bioturbated carbonate-rice
441.77	5.72439	159.138	2819.83	34.3463	3019.04	0.189609	5.27114	93.4016	1.13766	bioturbated carbonate-rich																											802.89	92.8324	1632.3	30.9441	139.249	1895.33	4.89796	86.1224	1.63265	7.34694	Bioturbated carbonate-rice
441.93	0	68.4918	214.256	33.3678	316.116	0	21.6667	67.7778	10.5556	bioturbated carbonate-rich																											803.08	79.8416	801.487	350.075	3.07083	1234.47	6.46766	64.9254	28.3582	0.248756	Bioturbated carbonate-rice
442.28	0.464328	65.9345	205.233	53.3977	325.029	0.142857	20.2857	63.1429	16.4286	bioturbated carbonate-rich																											803.49	55.0197	978.565	204.359	51.0897	1289.03	4.26829	75.9146	15.8537	3.96341	Bioturbated carbonate-rice
444.19	0	58.1459	171.207	9.69099	239.044	0	24.3243	71.6216	4.05405	bioturbated carbonate-rich																											803.6	40.459	1137.35	265.232	17.9818	1461.02	2.76923	77.8462	18.1538	1.23077	Bioturbated carbonate-rice
445.49	3.88354	80.2599	886.742	3.88354	974.769	0.398406	8.23373	90.9695	0.398406	bioturbated carbonate-rich																											803.8	36.9778	694.045	145.067	17.0667	893.156	4.14013	77.707	16.242	1.91083	Bioturbated carbonate-rice
452.7	32.6874	593.82	136.197	43.5831	806.288	4.05405	73.6486	16.8919	5.40541	bioturbated carbonate-rich																											804.92	22.0436	107.279	360.045	23.5132	512.881	4.29799	20.9169	70.2006	4.58453	Bioturbated carbonate-rice
452.93	0	376.012	70.7549	18.1941	464.961	0	80.8696	15.2174	3.91304	bioturbated carbonate-rich																											805.12	0	0	0	0	0	0	0	0	0	Bioturbated carbonate-rice
480.29	50.0856	84.9937	65.263	9.10647	209.449	23.913	40.5797	31.1594	4.34783	bioturbated carbonate-rich																											805.32	35.7217	13.6083	56.1341	3.40207	108.866	32.8125	12.5	51.5625	3.125	Bioturbated carbonate-rice
603.18	0	0	0	0	0	0	0	0	0	bioturbated carbonate-rich																											805.72	24.6661	41.624	12.333	1.54163	80.1647	30.7692	51.9231	15.3846	1.92308	Bioturbated carbonate-rice
632.105	0	161.284	6.72019	6.72019	174.725	0	92.3077	3.84615	3.84615	bioturbated carbonate-rich																											807.61	24.108	2105.43	241.08	24.108	2394.73	1.00671	87.9195	10.0671	1.00671	Bioturbated carbonate-rice
645.73	0	0	0	0	0	0	0	0	0	bioturbated carbonate-rich																											807.81	8.36539	2024.42	560.481	33.4616	2626.73	0.318471	77.0701	21.3376	1.27389	Bioturbated carbonate-rice
647.92	0	0	0	0	0	0	0	0	0	bioturbated carbonate-rich																											808.01	15.6272	1218.92	109.39	20.8362	1364.77	1.14504	89.313	8.01527	1.52672	Bioturbated carbonate-rice
651.19	0	0	0	0	0	0	0	0	0	bioturbated carbonate-rich																											808.21	26.7884	926.112	153.076	7.65382	1113.63	2.4055	83.1615	13.7457	0.687285	Bioturbated carbonate-rice
671.54	27.7453	91.5596	915.596	24.9708	1059.87	2.6178	8.63874	86.3874	2.35602	bioturbated carbonate-rich																											843.56	7.26006	842.167	36.3003	29.0402	914.767	0.793651	92.0635	3.96825	3.1746	Bioturbated carbonate-rice
674.31	10.082	100.82	342.787	30.2459	483.934	2.08333	20.8333	70.8333	6.25	bioturbated carbonate-rich																											848.65	129.272	775.63	463.857	76.0422	1444.8	8.94737	53.6842	32.1053	5.26316	Bioturbated carbonate-rice
682.81	56.7327	85.0991	924.743	11.3465	1077.92	5.26316	7.89474	85.7895	1.05263	bioturbated carbonate-rich																											864.66	30.5746	589.256	183.448	58.3697	861.648	3.54839	68.3871	21.2903	6.77419	Bioturbated carbonate-rice
693.86	3.02153	51.3659	33.2368	0	87.6242	3.44828	58.6207	37.931	0	bioturbated carbonate-rich																											866.76	16.1989	554.813	161.989	113.392	846.393	1.91388	65.5502	19.1388	13.3971	Bioturbated carbonate-rice
722.38	0	45.203	22.6015	0	67.8045	0	66.6667	33.3333	0	bioturbated carbonate-rich																											866.82	109.426	651.695	262.623	102.131	1125.88	9.71922	57.8834	23.3261	9.07127	Bioturbated carbonate-rice
723.89	24.862	202.448	3.55172	63.9309	294.792	8.43373	68.6747	1.20482	21.6867	bioturbated carbonate-rich																											869.725	44.6219	452.594	95.6184	50.9965	643.831	6.93069	70.297	14.8515	7.92079	Bioturbated carbonate-rice
739.05	13.1753	136.145	81.248	15.3712	245.94	5.35714	55.3571	33.0357	6.25	bioturbated carbonate-rich																											872.56	58.6141	637.939	128.133	136.312	960.998	6.09929	66.383	13.3333	14.1844	Bioturbated carbonate-rice
741.455	9.73858	355.458	4.86929	58.4315	428.497	2.27273	82.9545	1.13636	13.6364	bioturbated carbonate-rich																											873.52	27.7509	388.512	62.4394	93.6591	572.361	4.84848	67.8788	10.9091	16.3636	Bioturbated carbonate-rice
747.19	30.3857	34.7265	4.34081	10.852	80.3049	37.8378	43.2432	5.40541	13.5135	bioturbated carbonate-rich																											873.92	22.3823	304.399	26.8588	60.4322	414.072	5.40541	73.5135	6.48649	14.5946	Bioturbated carbonate-rice
751.55	40.2509	275.048	3.35424	33.5424	352.195	11.4286	78.0952	0.952381	9.52381	bioturbated carbonate-rich																											874.48	6.35534	218.2	27.5398	65.6719	317.767	2	68.6667	8.66667	20.6667	Bioturbated carbonate-rice
753.015	0	0	0	0	0	0	0	0	0	bioturbated carbonate-rich																											876.68	46.3424	210.98	9.7563	73.1723	340.251	13.6201	62.0072	2.86738	21.5054	Bioturbated carbonate-rice
777.62	36.113	466.46	33.1036	63.1978	598.874	6.03015	77.8894	5.52764	10.5528	bioturbated carbonate-rich																											877.66	11.7105	185.904	43.9144	108.322	349.851	3.34728	53.1381	12.5523	30.9623	Bioturbated carbonate-rice
781.54	44.9239	106.184	49.0079	28.5879	228.703	19.6429	46.4286	21.4286	12.5	bioturbated carbonate-rich
796.9	29.9165	824.84	17.0951	29.9165	901.768	3.31754	91.4692	1.89573	3.31754	bioturbated carbonate-rich																											average	31.2844	468.895	309.5	35.3591	845.039	5.53505	52.6314	26.1294	6.02679	Bioturbated carbonate-rice
797.31	19.1057	716.464	214.939	23.8821	974.391	1.96078	73.5294	22.0588	2.45098	bioturbated carbonate-rich																											stdev	31.3637	494.779	663.236	34.2891	809.095	7.88752	30.575	28.2302	6.7539	Bioturbated carbonate-rice
801.01	22.9085	302.106	25.7721	51.5442	402.331	5.69395	75.089	6.40569	12.8114	bioturbated carbonate-rich																											min	-0.0792768	-25.8835	-353.736	1.06999	35.944	-2.35247	22.0563	-2.10082	-0.72711	Bioturbated carbonate-rice
801.21	89.7723	982.508	364.077	24.9367	1461.29	6.14334	67.2355	24.9147	1.70648	bioturbated carbonate-rich																											max	62.6481	963.674	972.736	69.6483	1654.13	13.4226	83.2064	54.3596	12.7807	Bioturbated carbonate-rice
801.41	103.167	892.393	149.592	15.475	1160.63	8.88889	76.8889	12.8889	1.33333	bioturbated carbonate-rich
801.6	60.0752	745.639	236.767	38.8722	1081.35	5.55556	68.9542	21.8954	3.59477	bioturbated carbonate-rich
801.81	75.0177	1041.91	358.418	62.5148	1537.86	4.87805	67.7507	23.3062	4.06504	bioturbated carbonate-rich
802.01	86.2545	1016.89	240.605	18.1588	1361.91	6.33333	74.6667	17.6667	1.33333	bioturbated carbonate-rich
802.21	69.2917	1187.86	356.357	34.6459	1648.15	4.2042	72.0721	21.6216	2.1021	bioturbated carbonate-rich
802.89	92.8324	1632.3	30.9441	139.249	1895.33	4.89796	86.1224	1.63265	7.34694	bioturbated carbonate-rich
803.08	79.8416	801.487	350.075	3.07083	1234.47	6.46766	64.9254	28.3582	0.248756	bioturbated carbonate-rich
803.49	55.0197	978.565	204.359	51.0897	1289.03	4.26829	75.9146	15.8537	3.96341	bioturbated carbonate-rich
803.6	40.459	1137.35	265.232	17.9818	1461.02	2.76923	77.8462	18.1538	1.23077	bioturbated carbonate-rich
803.8	36.9778	694.045	145.067	17.0667	893.156	4.14013	77.707	16.242	1.91083	bioturbated carbonate-rich
804.92	22.0436	107.279	360.045	23.5132	512.881	4.29799	20.9169	70.2006	4.58453	bioturbated carbonate-rich
805.12	0	0	0	0	0	0	0	0	0	bioturbated carbonate-rich
805.32	35.7217	13.6083	56.1341	3.40207	108.866	32.8125	12.5	51.5625	3.125	bioturbated carbonate-rich
805.72	24.6661	41.624	12.333	1.54163	80.1647	30.7692	51.9231	15.3846	1.92308	bioturbated carbonate-rich
807.61	24.108	2105.43	241.08	24.108	2394.73	1.00671	87.9195	10.0671	1.00671	bioturbated carbonate-rich
807.81	8.36539	2024.42	560.481	33.4616	2626.73	0.318471	77.0701	21.3376	1.27389	bioturbated carbonate-rich
808.01	15.6272	1218.92	109.39	20.8362	1364.77	1.14504	89.313	8.01527	1.52672	bioturbated carbonate-rich
808.21	26.7884	926.112	153.076	7.65382	1113.63	2.4055	83.1615	13.7457	0.687285	bioturbated carbonate-rich
843.56	7.26006	842.167	36.3003	29.0402	914.767	0.793651	92.0635	3.96825	3.1746	bioturbated carbonate-rich
848.65	129.272	775.63	463.857	76.0422	1444.8	8.94737	53.6842	32.1053	5.26316	bioturbated carbonate-rich
864.66	30.5746	589.256	183.448	58.3697	861.648	3.54839	68.3871	21.2903	6.77419	bioturbated carbonate-rich
866.76	16.1989	554.813	161.989	113.392	846.393	1.91388	65.5502	19.1388	13.3971	bioturbated carbonate-rich
866.82	109.426	651.695	262.623	102.131	1125.88	9.71922	57.8834	23.3261	9.07127	bioturbated carbonate-rich
869.725	44.6219	452.594	95.6184	50.9965	643.831	6.93069	70.297	14.8515	7.92079	bioturbated carbonate-rich
872.56	58.6141	637.939	128.133	136.312	960.998	6.09929	66.383	13.3333	14.1844	bioturbated carbonate-rich
873.52	27.7509	388.512	62.4394	93.6591	572.361	4.84848	67.8788	10.9091	16.3636	bioturbated carbonate-rich
873.92	22.3823	304.399	26.8588	60.4322	414.072	5.40541	73.5135	6.48649	14.5946	bioturbated carbonate-rich
874.48	6.35534	218.2	27.5398	65.6719	317.767	2	68.6667	8.66667	20.6667	bioturbated carbonate-rich
876.68	46.3424	210.98	9.7563	73.1723	340.251	13.6201	62.0072	2.86738	21.5054	bioturbated carbonate-rich
877.66	11.7105	185.904	43.9144	108.322	349.851	3.34728	53.1381	12.5523	30.9623	bioturbated carbonate-rich
431.27	2.72726	99.9996	1270.9	38.1817	1411.81	0.193175	7.08307	90.0193	2.70444	pelagic clays
431.5	5.47468	182.033	1051.14	42.4287	1281.07	0.42735	14.2094	82.0513	3.31197	pelagic clays
432.02	1.17746	65.9375	1341.12	4.70982	1412.95	0.0833333	4.66667	94.9167	0.333333	pelagic clays
432.42	4.51676	31.6173	839.213	25.2938	900.641	0.501505	3.51053	93.1795	2.80843	pelagic clays
432.76	0	61.0462	1457.32	27.276	1545.64	0	3.94958	94.2857	1.76471	pelagic clays
432.96	1.73814	60.2555	993.057	45.771	1100.82	0.157895	5.47368	90.2105	4.15789	pelagic clays
433.7	5.44694	64.0015	302.305	100.768	472.522	1.15274	13.5447	63.9769	21.3256	pelagic clays
433.84	2.51724	183.759	598.265	41.9541	826.495	0.304569	22.2335	72.3858	5.07614	pelagic clays
433.92	2.6258	217.066	754.478	43.7633	1017.93	0.257954	21.3242	74.1187	4.29923	pelagic clays
433.94	2.14157	131.707	659.604	24.6281	818.08	0.26178	16.0995	80.6283	3.01047	pelagic clays
434.11	5.39418	83.6099	204.979	26.9709	320.954	1.68067	26.0504	63.8655	8.40336	pelagic clays
434.19	1.95038	82.8911	1448.16	38.0324	1571.03	0.124146	5.27623	92.1788	2.42086	pelagic clays
403.71	8.67918	167.074	1690.27	0	1866.02	0.465116	8.95349	90.5814	0	laminated siltstones
411.81	3.19943	151.973	91.1838	0	246.356	1.2987	61.6883	37.013	0	laminated siltstones
421.32	3.16336	80.1384	3.16336	0	86.4651	3.65854	92.6829	3.65854	0	laminated siltstones
421.52	18.5949	64.2371	49.023	40.5708	172.426	10.7843	37.2549	28.4314	23.5294	laminated siltstones
421.62	0	42.8067	15.5661	0	58.3727	0	73.3333	26.6667	0	laminated siltstones
440.87	13.1227	153.827	2264.39	24.0582	2455.4	0.534442	6.26485	92.2209	0.97981	laminated siltstones
441.06	23.0865	99.2718	1075.06	24.6256	1222.04	1.88917	8.12343	87.9723	2.01511	laminated siltstones
441.1	2.4048	80.9617	1548.69	0	1632.06	0.147348	4.96071	94.8919	0	laminated siltstones
441.12	1.14607	96.2695	775.886	16.6179	889.92	0.128783	10.8178	87.1861	1.86735	laminated siltstones
442.88	0	94.5639	86.4294	73.2108	254.204	0	37.2	34	28.8	laminated siltstones
443.08	0	59.4498	77.2848	121.872	258.607	0	22.9885	29.8851	47.1264	laminated siltstones
443.23	0	0	0	0	0	0	0	0	0	laminated siltstones
449.97	4.83364	529.284	101.506	19.3346	654.959	0.738007	80.8118	15.4982	2.95203	laminated siltstones
517.19	3.10243	69.8047	766.3	1.55122	840.759	0.369004	8.30258	91.1439	0.184502	laminated siltstones
537.3	1.1851	113.77	41.4787	3.55531	159.989	0.740741	71.1111	25.9259	2.22222	laminated siltstones
545.6	0	235.886	67.396	8.4245	311.706	0	75.6757	21.6216	2.7027	laminated siltstones
623.99	138.913	2897.32	178.602	79.3788	3294.22	4.21687	87.9518	5.42169	2.40964	laminated siltstones
643.1	0	86.4493	155.165	13.2999	254.915	0	33.913	60.8696	5.21739	laminated siltstones
653.86	0	0	0	0	0	0	0	0	0	laminated siltstones
656.79	3.3393	33.393	16.6965	0	53.4288	6.25	62.5	31.25	0	laminated siltstones
660.8	8.44475	33.779	1900.07	8.44475	1950.74	0.4329	1.7316	97.4026	0.4329	laminated siltstones
662.27	0	98.0532	0	13.6185	111.672	0	87.8049	0	12.1951	laminated siltstones
670.38	0	93.3082	5.3319	10.6638	109.304	0	85.3659	4.87805	9.7561	laminated siltstones
680.01	8.9401	96.106	31.2903	22.3502	158.687	5.6338	60.5634	19.7183	14.0845	laminated siltstones
685.43	0	215.521	70.9309	43.6498	330.102	0	65.2893	21.4876	13.2231	laminated siltstones
689.59	63.4186	1313.67	22.6495	72.4784	1472.22	4.30769	89.2308	1.53846	4.92308	laminated siltstones
776.62	17.0032	437.832	29.7555	85.0158	569.606	2.98507	76.8657	5.22388	14.9254	laminated siltstones
778.96	2.87278	336.115	17.2367	83.3106	439.535	0.653595	76.4706	3.92157	18.9542	laminated siltstones
780.3	2.55421	390.795	38.3132	61.3012	492.963	0.518135	79.2746	7.77202	12.4352	laminated siltstones
782.72	89.0107	6.35791	0	0	95.3686	93.3333	6.66667	0	0	laminated siltstones
785.845	0	0	0	0	0	0	0	0	0	laminated siltstones
795.17	19.9037	241.688	152.121	4.26509	417.978	4.7619	57.8231	36.3946	1.02041	laminated siltstones
795.32	19.7888	31.662	186.015	3.95776	241.423	8.19672	13.1148	77.0492	1.63934	laminated siltstones
805.52	13.0006	160.341	42.252	6.5003	222.094	5.85366	72.1951	19.0244	2.92683	laminated siltstones
805.91	3.29085	9.87254	3.29085	0	16.4542	20	60	20	0	laminated siltstones
806	5.50974	35.2623	22.039	8.81559	71.6266	7.69231	49.2308	30.7692	12.3077	laminated siltstones
806.2	17.6074	410.84	52.8223	44.9968	526.266	3.34572	78.0669	10.0372	8.55019	laminated siltstones
806.43	531.456	3062.86	41.957	139.857	3776.13	14.0741	81.1111	1.11111	3.7037	laminated siltstones
806.56	11.6864	544.585	121.538	53.7573	731.567	1.59744	74.4409	16.6134	7.34824	laminated siltstones
806.96	6.53344	1483.09	65.3344	111.068	1666.03	0.392157	89.0196	3.92157	6.66667	laminated siltstones
816.2	15.7947	307.997	142.152	31.5894	497.533	3.1746	61.9048	28.5714	6.34921	laminated siltstones
819.75	4.61347	124.564	9.22694	48.4414	186.846	2.46914	66.6667	4.93827	25.9259	laminated siltstones
821.06	9.3481	311.603	3.11603	102.829	426.897	2.18978	72.9927	0.729927	24.0876	laminated siltstones
822.2	22.2644	897.995	148.429	59.3716	1128.06	1.97368	79.6053	13.1579	5.26316	laminated siltstones
834.13	52.1744	1108.71	26.0872	19.5654	1206.53	4.32432	91.8919	2.16216	1.62162	laminated siltstones
835.86	23.5292	799.994	141.175	23.5292	988.228	2.38095	80.9524	14.2857	2.38095	laminated siltstones
844.82	0	872.3	34.6151	166.152	1073.07	0	81.2903	3.22581	15.4839	laminated siltstones
846.13	48.6544	570.583	92.8857	48.6544	760.778	6.39535	75	12.2093	6.39535	laminated siltstones
847.42	15.6531	824.397	182.62	41.7416	1064.41	1.47059	77.451	17.1569	3.92157	laminated siltstones
878.01	69.5844	300.311	51.2727	69.5844	490.753	14.1791	61.194	10.4478	14.1791	laminated siltstones
393.91	4.83223	449.398	1768.6	0	2222.83	0.217391	20.2174	79.5652	0	laminated sandstones
421.77	7.93599	126.976	142.848	66.6623	344.422	2.30415	36.8664	41.4747	19.3548	laminated sandstones
421.92	10.6415	94.2534	17.4825	0	122.377	8.69565	77.0186	14.2857	0	laminated sandstones
422.04	17.7454	139.428	271.252	83.657	512.082	3.46535	27.2277	52.9703	16.3366	laminated sandstones
431.71	30.7764	65.2832	205.176	0	301.236	10.2167	21.6718	68.1115	0	laminated sandstones
433.16	0.894902	89.4902	170.031	67.1176	327.534	0.273224	27.3224	51.9126	20.4918	laminated sandstones
459.515	45.2617	94.6381	139.9	22.6309	302.43	14.966	31.2925	46.2585	7.48299	mass-waste deposits
469.27	96.8416	114.003	131.165	13.4843	355.494	27.2414	32.069	36.8966	3.7931	mass-waste deposits
478.82	44.4376	22.2188	153.063	2.46875	222.188	20	10	68.8889	1.11111	mass-waste deposits
488.31	0	334.507	174.606	14.7036	523.817	0	63.8596	33.3333	2.80702	mass-waste deposits
499.46	20.8095	322.548	31.2143	52.0238	426.595	4.87805	75.6098	7.31707	12.1951	mass-waste deposits
500.11	0	148.652	37.1629	18.5815	204.396	0	72.7273	18.1818	9.09091	mass-waste deposits
507.61	0	89.7593	23.8137	9.15911	122.732	0	73.1343	19.403	7.46269	mass-waste deposits
508.99	17.9378	120.045	211.114	9.65882	358.756	5	33.4615	58.8462	2.69231	mass-waste deposits
510.3	0	53.5139	76.1544	14.4076	144.076	0	37.1429	52.8571	10	mass-waste deposits
518.19	13.3147	128.154	316.225	18.3078	476.002	2.7972	26.9231	66.4336	3.84615	mass-waste deposits
536.02	6.40571	172.954	94.4842	6.40571	280.25	2.28571	61.7143	33.7143	2.28571	mass-waste deposits
555.18	15.5935	159.401	0	22.524	197.518	7.89474	80.7018	0	11.4035	mass-waste deposits
564.79	0	0	0	0	0	0	0	0	0	mass-waste deposits
710.13	0	0	0	0	0	0	0	0	0	mass-waste deposits
711.56	2.99278	326.213	0	38.9061	368.112	0.813008	88.6179	0	10.5691	mass-waste deposits
719.65	31.1981	415.975	41.5975	76.262	565.032	5.52147	73.6196	7.36196	13.4969	mass-waste deposits
728.28	39.0401	182.187	30.3645	15.1822	266.774	14.6341	68.2927	11.3821	5.69106	mass-waste deposits
795.56	38.4808	832.147	495.44	129.873	1495.94	2.57235	55.627	33.119	8.68167	mass-waste deposits
795.73	12.2023	527.138	195.236	17.0832	751.659	1.62338	70.1299	25.974	2.27273	mass-waste deposits
795.91	14.3016	531.541	219.291	23.8359	788.969	1.81269	67.3716	27.7946	3.02115	mass-waste deposits
796.12	15.4522	97.864	29.1875	0	142.504	10.8434	68.6747	20.4819	0	mass-waste deposits
796.32	23.6481	387.828	42.5665	23.6481	477.691	4.9505	81.1881	8.91089	4.9505	mass-waste deposits
796.53	11.1734	513.977	100.561	11.1734	636.885	1.75439	80.7018	15.7895	1.75439	mass-waste deposits
796.69	16.0243	366.779	162.024	24.9267	569.753	2.8125	64.375	28.4375	4.375	mass-waste deposits
797.51	12.8742	933.383	231.736	67.5898	1245.58	1.03359	74.9354	18.6047	5.42636	mass-waste deposits
797.71	10.0105	840.878	150.157	90.0941	1091.14	0.917431	77.0642	13.7615	8.25688	mass-waste deposits
797.91	31.2585	744.52	102.3	34.1001	912.179	3.42679	81.6199	11.215	3.73832	mass-waste deposits
798.02	0	247.903	17.8669	82.6344	348.405	0	71.1538	5.12821	23.7179	mass-waste deposits
798.21	3.6667	214.502	14.6668	49.5005	282.336	1.2987	75.974	5.19481	17.5325	mass-waste deposits
798.4	0	180.181	18.4801	27.7201	226.381	0	79.5918	8.16327	12.2449	mass-waste deposits
798.62	22.7227	965.713	106.039	30.2969	1124.77	2.0202	85.8586	9.42761	2.6936	mass-waste deposits
799.02	16.0141	707.287	202.845	58.7182	984.864	1.62602	71.8157	20.5962	5.96206	mass-waste deposits
799.22	24.7473	524.192	267.721	40.4955	857.156	2.88714	61.1549	31.2336	4.72441	mass-waste deposits
799.42	143.528	437.261	40.0544	30.0408	650.884	22.0513	67.1795	6.15385	4.61538	mass-waste deposits
799.51	103.163	778.413	53.1446	59.3969	994.117	10.3774	78.3019	5.34591	5.97484	mass-waste deposits
799.71	5.00326	265.173	41.6939	43.3616	355.232	1.40845	74.6479	11.7371	12.2066	mass-waste deposits
799.91	3.29557	342.739	26.3645	16.4778	388.877	0.847458	88.1356	6.77966	4.23729	mass-waste deposits
800.1	0	179.786	83.9001	30.6302	294.316	0	61.086	28.5068	10.4072	mass-waste deposits
800.31	73.6663	879.084	275.021	49.1109	1276.88	5.76923	68.8462	21.5385	3.84615	mass-waste deposits
800.51	47.2336	686.462	255.062	37.7869	1026.54	4.60123	66.8712	24.8466	3.68098	mass-waste deposits
800.71	84.8607	678.885	91.1466	59.7168	914.609	9.27835	74.2268	9.96564	6.52921	mass-waste deposits
800.91	18.5785	506.264	30.1901	58.0578	613.091	3.0303	82.5758	4.92424	9.4697	mass-waste deposits
804	30.4758	612.902	16.931	189.627	849.936	3.58566	72.1116	1.99203	22.3108	mass-waste deposits
804.2	23.9254	404.892	150.914	42.3296	622.061	3.84615	65.0888	24.2604	6.80473	mass-waste deposits
807.01	0	1274.91	237.484	0	1512.4	0	84.2975	15.7025	0	mass-waste deposits
807.21	17.2885	1596.31	282.379	40.3399	1936.31	0.892857	82.4405	14.5833	2.08333	mass-waste deposits
807.41	87.2448	1148.72	152.678	50.8928	1439.54	6.06061	79.798	10.6061	3.53535	mass-waste deposits
808.41	56.0654	1816.52	207.442	61.672	2141.7	2.6178	84.8168	9.68586	2.87958	mass-waste deposits
808.51	85.1992	970.53	122.242	22.2259	1200.2	7.09877	80.8642	10.1852	1.85185	mass-waste deposits
808.71	37.153	1348.12	238.841	58.3833	1682.5	2.2082	80.1262	14.1956	3.47003	mass-waste deposits
808.91	41.0034	1029.64	291.58	68.339	1430.56	2.86624	71.9745	20.3822	4.77707	mass-waste deposits
809.11	15.8346	738.946	195.293	31.6691	981.743	1.6129	75.2688	19.8925	3.22581	mass-waste deposits
809.31	13.7695	1110.74	146.874	36.7186	1308.1	1.05263	84.9123	11.2281	2.80702	mass-waste deposits
809.51	16.1831	975.03	125.419	117.327	1233.96	1.31148	79.0164	10.1639	9.5082	mass-waste deposits
809.72	33.2736	805.22	113.13	33.2736	984.898	3.37838	81.7568	11.4865	3.37838	mass-waste deposits
809.91	33.4842	414.832	81.8502	7.44093	537.607	6.22837	77.1626	15.2249	1.38408	mass-waste deposits
810.01	30.8034	1139.73	88.0098	35.2039	1293.74	2.38095	88.0952	6.80272	2.72109	mass-waste deposits
810.21	29.6953	601.33	69.2891	24.7461	725.06	4.09556	82.9352	9.55631	3.41297	mass-waste deposits
810.415	32.5038	531.669	164.841	39.4689	768.483	4.22961	69.1843	21.4502	5.13595	mass-waste deposits
810.58	17.0389	555.893	78.8047	19.1687	670.905	2.53968	82.8571	11.746	2.85714	mass-waste deposits
810.81	20.5313	549.783	141.438	20.5313	732.284	2.80374	75.0779	19.3146	2.80374	mass-waste deposits
811.01	50.202	456.001	83.67	39.7432	629.617	7.97342	72.4252	13.289	6.31229	mass-waste deposits
814.72	154.042	437.145	58.2861	33.3063	682.779	22.561	64.0244	8.53659	4.87805	mass-waste deposits
817.41	0	0	0	0	0	0	0	0	0	mass-waste deposits
818.4	100.982	474.988	67.3211	119.682	762.973	13.2353	62.2549	8.82353	15.6863	mass-waste deposits
824.32	286.227	990.786	80.7307	344.94	1702.68	16.8103	58.1897	4.74138	20.2586	mass-waste deposits
827.34	66.0813	443.134	104.953	101.066	715.233	9.23913	61.9565	14.6739	14.1304	mass-waste deposits
828.49	47.3216	341.392	60.8421	27.0409	476.597	9.92908	71.6312	12.766	5.67376	mass-waste deposits
829.99	21.2785	907.882	212.785	78.0211	1219.97	1.74419	74.4186	17.4419	6.39535	mass-waste deposits
831.49	43.5413	646.899	261.248	37.3211	989.01	4.40252	65.4088	26.4151	3.77358	mass-waste deposits
832.68	0	218.448	16.0623	48.187	282.697	0	77.2727	5.68182	17.0455	mass-waste deposits
877.06	43.9391	233.911	31.0158	129.233	438.099	10.0295	53.3923	7.07965	29.4985	mass-waste deposits
877.26	4.60617	114.003	2.30309	94.4265	215.339	2.13904	52.9412	1.06952	43.8503	mass-waste deposits
878.41	78.982	696.211	111.16	181.366	1067.72	7.39726	65.2055	10.411	16.9863	mass-waste deposits
879.51	83.349	284.367	66.6792	66.6792	501.075	16.6341	56.7515	13.3072	13.3072	mass-waste deposits
884.57	212.791	293.91	63.4846	108.159	678.344	31.3692	43.3276	9.35875	15.9445	mass-waste deposits
884.77	1910.73	128.389	22.6569	513.557	2575.34	74.1935	4.98534	0.879765	19.9413	mass-waste deposits
886.29	644.307	322.154	84.8788	104.169	1155.51	55.7596	27.8798	7.34558	9.01503	mass-waste deposits
886.49	486.439	240.402	56.3443	90.1509	873.337	55.6989	27.5269	6.45161	10.3226	mass-waste deposits
892.055	6.72654	85.2028	4.48436	29.1483	125.562	5.35714	67.8571	3.57143	23.2143	mass-waste deposits
892.455	302.104	191	104.863	109.856	707.822	42.6808	26.9841	14.8148	15.5203	mass-waste deposits
892.735	428.772	165.336	22.0448	63.93	680.083	63.047	24.3112	3.24149	9.40032	mass-waste deposits
893.1	1613.71	455.512	63.5598	261.301	2394.08	67.4041	19.0265	2.65487	10.9145	mass-waste deposits
893.4	363.771	315.019	146.259	135.008	960.056	37.8906	32.8125	15.2344	14.0625	mass-waste deposits
893.735	2186.06	190.803	490.637	239.867	3107.37	70.3509	6.14035	15.7895	7.7193	mass-waste deposits
894.015	5018.36	367.587	127.856	351.604	5865.4	85.5586	6.26703	2.17984	5.99455	mass-waste deposits
894.325	591.162	136.977	20.186	69.2092	817.534	72.3104	16.7549	2.46914	8.46561	mass-waste deposits
894.695	1049.24	361.405	23.3165	135.236	1569.2	66.8648	23.0312	1.48588	8.61813	mass-waste deposits
880.1	489.67	261.474	22.1857	88.7429	862.073	56.8015	30.3309	2.57353	10.2941	glauconitic sandstones
882.06	1717.98	191.241	108.37	210.365	2227.95	77.1102	8.58369	4.86409	9.44206	glauconitic sandstones
882.43	48.1172	280.684	96.2344	26.7318	451.767	10.6509	62.1302	21.3018	5.91716	glauconitic sandstones
881.54	2943.3	258.486	0	0	3201.78	91.9268	8.0732	0	0	glauconitic sandstones
882.86	962.946	367.042	64.7722	159.771	1554.53	61.9444	23.6111	4.16667	10.2778	glauconitic sandstones
882.96	68.1656	679.222	131.462	73.0346	951.885	7.16113	71.3555	13.8107	7.67263	glauconitic sandstones
883.3	502.093	248.743	55.2763	132.049	938.161	53.5188	26.5139	5.89198	14.0753	glauconitic sandstones
883.73	2168.87	454.261	71.2566	89.0708	2783.46	77.92	16.32	2.56	3.2	glauconitic sandstones
883.94	399.818	81.213	9.37073	15.6179	506.019	79.0123	16.0494	1.85185	3.08642	glauconitic sandstones
885.57	597.886	504.686	42.2037	80.8905	1225.67	48.7805	41.1765	3.44333	6.59971	glauconitic sandstones
885.69	336.223	250.493	50.9024	75.014	712.633	47.1805	35.1504	7.14286	10.5263	glauconitic sandstones
886.09	461.381	434.557	128.758	114.451	1139.15	40.5024	38.1476	11.303	10.0471	glauconitic sandstones
891.255	152.948	332.788	73.953	117.652	677.342	22.5806	49.1315	10.9181	17.3697	glauconitic sandstones
891.655	333.672	134.065	32.7713	145.981	646.489	51.6129	20.7373	5.06912	22.5806	glauconitic sandstones
894.935	10957.9	645.849	1722.26	1162.53	14488.5	75.6315	4.45765	11.8871	8.02377	glauconitic sandstones
895.005	19309.1	2232.26	1116.13	1506.78	24164.3	79.9076	9.23788	4.61894	6.23557	glauconitic sandstones
895.185	5483.32	443.671	591.562	364.038	6882.59	79.6694	6.44628	8.59504	5.28926	glauconitic sandstones
895.395	7764.44	661.809	969.077	732.717	10128	76.6628	6.53442	9.56826	7.23454	glauconitic sandstones
average	2323.74	389.446	221.758	230.514	3165.46	57.293	25.951	7.06224	9.69376	Miocene
[truncated: 87 more columns]

## Sheet: dinocyst counts
Leg	Site	Hole	Core	type	Section	half	Interval top	interval bottom	depth top	deth bottom	mid-depth	Weight	Lycobatch	Lycopodium	dc/gram	DC total	Achilleodinium biformoides	Achomosphaera alcicornu	Adnatosphaeridium? sp.	Aiora fenestrata	Aireiana verrucosa	Adnatosphaeridium spp.	Alisocysta circumtabulata	Alterbidinium distinctum	Apectodinium spp.	Arachnodinium antarcticum	Areoligera cpx	Areoligera semicirculata	Ataxodinium spp.	Batiacasphaera compta	Batiacasphaera spp.	Batiacasphaera hirsuta	Batiacasphaera micropapillata	Batiacasphaera minuta	Batiacasphaera sphaerica	Batiacasphaera sp. A	Batiacasphaera sp. B	Batiacasphaera sp. C	Brigantedinium simplex	Brigantedinium pynei	Brigantedinium sp. A	Brigantedinium sp. B	Brigantedinium sp. C	Brigantedinium sp. D	Cerebrocysta WR small	Cerebrocysta delicata	Cerebrocysta sp. A	Cerebrocysta bartonensis	Charlesdowniea clathrata
318	U1356	A	11	R	1	W	20	22	95.6	95.62	95.61	14.2013	20848	216	353.416	52													1			2							11
318	U1356	A	12	R	2	W	20	22	106.6	106.62	106.61	12.9878	20848	513	375.485	120													23			12		7	5				5
318	U1356	A	13	R	1	W	20	22	114.7	114.72	114.71	11.63	20848	500	25.0965	7
318	U1356	A	13	R	2	W	40	42	116.4	116.42	116.41	14.07	20848	500	130.393	44																2		3	2				1
318	U1356	A	14	R	1	W	20	22	124.3	124.32	124.31	14.7322	20848		0	0
318	U1356	A	14	R	3	W	20	22	127.3	127.32	127.31	8.77	20848	738	167.499	52													1			3		2	4				5	1
318	U1356	A	14	R	5	W	20	22	129.8	129.82	129.81	12.81	20848	744	148.748	68																1		2					17	13
318	U1356	A	15	R	2	W	20	22	135.5	135.52	135.51	7.134	20848		0	0
318	U1356	A	15	R	4	W	20	22	138.5	138.52	138.51	12.05	20848	586	126.955	43																	4	1					3	2
318	U1356	A	15	R	6	W	20	22	141	141.02	141.01	8.19	20848	780	234.973	72																							4	15
318	U1356	A	17	R	1	W	20	22	153.2	153.22	153.21	10.903	20848	500	118.552	31																1							10
318	U1356	A	17	R	3	W	20	22	156.2	156.22	156.21	10.01	20848	510	298.114	73																			1				16	4
318	U1356	A	18	R	3	W	21	23	165.71	165.73	165.72	11.4274	20848	513	241.829	68													2										11	4
318	U1356	A	19	R	2	W	20	22	173.8	173.82	173.81	9.3601	20848	500	124.73	28													3
318	U1356	A	19	R	3	W	20	22	175.3	175.32	175.31	9.68	20848		0	0
318	U1356	A	19	R	5	W	20	22	178.31	178.33	178.32	13.19	20848	852	155.833	84													5			2	2
318	U1356	A	20	R	2	W	20	22	183.4	183.42	183.41	8.3888	20848	732	145.99	43													5										14
318	U1356	A	21	R	2	W	20	22	193	193.02	193.01	10.97	20848	767	205.656	83																	3	8	1				13	10
318	U1356	A	22	R	2	W	20	22	202.6	202.62	202.61	7.7729	20848	785	95.6687	28																							5
318	U1356	A	24	R	2	W	20	22	221.51	221.53	221.52	7.6632	20848	617	74.958	17																							2	1
318	U1356	A	30	R	1	W	18	20	277.68	277.7	277.69	11.0514	20848		0	0
318	U1356	A	30	R	4	W	20	22	282.2	282.22	282.21	8.265	20848	1024	184.749	75			8															2	2					1
318	U1356	A	30	R	6	W	20	22	284.6	284.62	284.61	9.6029	20848	500	69.4723	16
318	U1356	A	34	R	1	W	27	29	316.17	316.19	316.18	6.8633	20848	838	489.352	135			2															28	4				5
318	U1356	A	34	R	4	W	20	22	320.1	320.12	320.11	8.2447	20848	390	564.085	87																1		12					16	12
318	U1356	A	35	R	2	W	20	22	327.2	327.22	327.21	9.28	20848	710	503.101	159																		46	1				42	16
318	U1356	A	35	R	4	W	20	22	330.2	330.22	330.21	13.7898	20848		0	0
318	U1356	A	39	R	1	W	20	22	363.8	363.82	363.81	10.0361	20848	581	110.837	31																2
318	U1356	A	40	R	2	W	19	21	374.89	374.91	374.9	13.8455	20848	259	348.825	60																			4
318	U1356	A	42	R	2	W	20	22	393.9	393.92	393.91	13.9173	20848	310	454.23	94																		10	8				4
318	U1356	A	43	R	2	W	20	22	403.7	403.72	403.71	10.04	20848	957	175.753	81																		1	3
318	U1356	A	44	R	1	W	20	22	411.8	411.82	411.81	16.7081	20848	780	155.172	97																		7	11
318	U1356	A	45	R	1	W	10	14	421.3	421.34	421.32	10.556	20848	1873	75.9206	72																		2					18			20		3
318	U1356	A	45	R	1	W	30	34	421.5	421.54	421.52	6.42	20848	1921	70.9988	42																							22	2			1	4
318	U1356	A	45	R	1	W	40	44	421.6	421.64	421.62	14.113	20848	1898	41.2501	53																							11	4		9		6
318	U1356	A	45	R	1	W	55	59	421.75	421.79	421.77	11.4119	20848	1151	131.737	83															2								64	3				3
318	U1356	A	45	R	1	W	70	74	421.9	421.94	421.92	14.0727	20848	1949	103.375	136																							51	1	3	8	1	11
318	U1356	A	45	R	1	W	82	86	422.02	422.06	422.04	8.1911	20848	1004	157.174	62																						1	36	1	3			1	1
318	U1356	A	46	R	1	W	45	49	431.25	431.29	431.27	15.0676	20848	1522	102.727	113																							3								2
318	U1356	A	46	R	1	W	68	72	431.48	431.52	431.5	13.9746	20848	2180	187.508	274																	1						13								38		1
318	U1356	A	46	R	1	W	87	91	431.69	431.67	431.71	17.1166	20848	1306	96.0596	103				1													1						17								10
318	U1356	A	46	R	1	W	120	124	432	432.04	432.02	17.3929	20848	2036	67.115	114				1
318	U1356	A	46	R	2	W	16	20	432.4	432.44	432.42	16.3099	20848	1415	36.1341	40
318	U1356	A	46	R	2	W	50	54	432.74	432.78	432.76	9.1459	20848	1755	61.0462	47																													2
318	U1356	A	46	R	2	W	70	74	432.94	432.98	432.96	14.6691	20848	2453	61.9936	107															1		3						1								3
318	U1356	A	46	R	2	W	90	94	433.14	433.18	433.16	13.2366	20848	1760	90.3851	101																							36	3							1
318	U1356	A	46	R	2	W	144	148	433.68	433.72	433.7	7.249	20848	2112	69.4485	51																	1														4
318	U1356	A	46	R	3	W	10	14	433.82	433.86	433.84	10.4177	20848	2385	186.276	222																							7								6
318	U1356	A	46	R	3	W	19	21	433.9	433.94	433.92	14.4358	20848	1650	219.692	251																															3
318	U1356	A	46	R	3	W	21	23	433.92	433.96	433.94	14.6942	20848	1325	133.848	125								1									2														1
318	U1356	A	46	R	3	W	37	41	434.09	434.13	434.11	10.3478	20848	747	89.004	33																							12	1				1			1
318	U1356	A	46	R	3	W	45	49	434.17	434.21	434.19	11.414	20848	1873	84.8414	87																							9	1					1		3
318	U1356	A	47	R	1	W	21	25	440.61	440.65	440.63	16.0449	20848	1988	176.472	270																	4						3						2		10
318	U1356	A	47	R	1	W	26	30	440.36	440.7	440.53	16.6172	20848	672	113.885	61															1								2						1		2
318	U1356	A	47	R	1	W	45	49	440.85	440.89	440.87	13.1117	20848	2181	166.95	229																	2						38		3				4		9
318	U1356	A	47	R	1	W	64	68	441.04	441.08	441.06	13.8503	20848	1956	122.358	159										1																					8
318	U1356	A	47	R	1	W	68	72	441.08	441.12	441.1	10.2717	20848	2532	83.3665	104																													2		3
318	U1356	A	47	R	1	W	70	74	441.1	441.14	441.12	14.7295	20848	2470	97.4156	170																													7		4
318	U1356	A	47	R	1	W	135	139	441.75	441.79	441.77	13.9753	20848	1303	164.862	144																		1											6		20
318	U1356	A	47	R	2	W	5	9	441.91	441.95	441.93	14.7284	20848	806	68.4918	39																3	1						25	2
318	U1356	A	47	R	2	W	40	44	442.26	442.3	442.28	13.4148	20848	3347	66.3988	143																							77	7	14						6
318	U1356	A	47	R	2	W	100	104	442.86	442.9	442.88	14.6661	20848	1398	91.5135	90																							74	3							1
318	U1356	A	47	R	2	W	120	124	443.06	443.1	443.08	15.3808	20848	912	59.4498	40																							34	1	1
318	U1356	A	47	R	2	W	135	139	443.21	443.25	443.23	15.6345	20848	barren	#VALUE!	0
318	U1356	A	47	R	3	W	85	89	444.17	444.21	444.19	15.5514	20848	415	58.1459	18															1								5								1
318	U1356	A	47	R	4	W	85	89	445.47	445.51	445.49	16.121	20848	999	84.1434	65															3																2
318	U1356	A	48	R	1	W	5	9	449.95	449.99	449.97	15.8862	20848	543	534.118	221																							76
318	U1356	A	48	R	2	W	128	132	452.68	452.72	452.7	15.3996	20848	497	623.784	229															3								68								4
318	U1356	A	48	R	3	W	1	5	452.91	452.95	452.93	15.1882	20848	679	376.012	186															2							2	98
318	U1356	A	49	R	1	W	10	13	459.5	459.53	459.515	17.872	20848	567	139.9	68															1							1	20
318	U1356	A	50	R	1	W	24	30	469.24	469.3	469.27	17.0241	20848	999	210.845	172															4							1	24						1
318	U1356	A	51	R	1	W	21	23	478.81	478.83	478.82	9.1196	20848	926	66.6563	27																							5
318	U1356	A	51	R	2	W	18	20	480.28	480.3	480.29	17.0424	20848	806	132.044	87															2								14						2
318	U1356	A	52	R	CC	W	9	13	488.29	488.33	488.31	16.9047	20848	671	332.669	181																							77								1
318	U1356	A	53	R	2	W	20	22	499.45	499.47	499.46	10.7293	20848	747	325.149	125																						1	78						1
318	U1356	A	53	R	2	W	84	88	500.09	500.13	500.11	10.7293	20848	732	116.798	44																						2	23
318	U1356	A	54	R	1	W	20	22	507.6	507.62	507.61	17.3756	20848	655	86.0956	47																							24								1
318	U1356	A	54	R	2	W	20	22	508.98	509	508.99	18.3809	20848	822	136.603	99																							31								6
318	U1356	A	54	R	3	W	0	4	510.29	510.31	510.3	16.4701	20848	615	53.5139	26																							14								4
318	U1356	A	55	R	1	W	18	20	517.18	517.2	517.19	15.1862	20848	885	72.9071	47																													1		3
318	U1356	A	55	R	2	W	18	20	518.18	518.2	518.19	12.5388	20848	999	141.469	85															1							8	16								3
318	U1356	A	57	R	1	W	21	23	536.01	536.03	536.02	18.1821	20848	716	179.36	112															1								19
318	U1356	A	57	R	2	W	18	20	537.29	537.31	537.3	17.6093	20848	999	114.955	97															1							5	17								22
318	U1356	A	58	R	1	W	19	21	545.59	545.61	545.6	18.8428	20848	788	234.482	167																				30		13	10								1
318	U1356	A	59	R	1	W	17	19	555.17	555.19	555.18	19.9547	20848	603	171.529	99						1																	54
318	U1356	A	60	R	1	W	18	20	564.78	564.8	564.79	16.9054	20848	barren	#VALUE!	0
318	U1356	A	64	R	1	W	17	19	603.17	603.19	603.18	17.3616	20848
318	U1356	A	66	R	2	W	18	20	623.98	624	623.99	9.8183	20848	107	3036.24	153																						5	40
318	U1356	A	67	R	1	W	19	22	632.09	632.12	632.105	9.3162	20848	999	161.284	72																							18
318	U1356	A	68	R	2	W	19	21	643.09	643.11	643.1	9.4146	20848	999	86.4493	39																							20
318	U1356	A	68	R	4	W	16	18	645.72	645.74	645.73	9.6621	20848			4
318	U1356	A	68	R	6	W	17	19	647.91	647.93	647.92	9.5661	20848			11
318	U1356	A	69	R	1	W	18	20	651.18	651.2	651.19	9.7227	20848			0
318	U1356	A	69	R	3	W	19	21	653.85	653.87	653.86	9.5988	20848			14																						1	2
318	U1356	A	69	R	5	W	18	20	656.78	656.8	656.79	9.2219	20848	677	36.7323	11															2							1
318	U1356	A	70	R	1	W	19	21	660.79	660.81	660.8	9.8553	20848	501	42.2238	10															1								1
318	U1356	A	70	R	2	W	21	23	662.26	662.28	662.27	9.7756	20848	783	98.0532	36																						1	27
318	U1356	A	71	R	1	W	17	19	670.37	670.39	670.38	9.5251	20848	821	93.3082	35																							14	10
318	U1356	A	71	R	2	W	18	20	671.53	671.55	671.54	9.5965	20848	783	116.53	42																						3	1
318	U1356	A	71	R	4	W	18	20	674.3	674.32	674.31	9.5956	20848	431	110.902	22																						2	1
318	U1356	A	72	R	1	W	20	22	680	680.02	680.01	9.3372	20848	999	105.046	47															2								24
318	U1356	A	72	R	3	W	18	20	682.8	682.82	682.81	9.7994	20848	750	141.832	50															1							5	1
318	U1356	A	72	R	5	W	18	20	685.42	685.44	685.43	9.3881	20848	814	207.337	76															1							4	16
318	U1356	A	73	R	1	W	18	20	689.58	689.6	689.59	8.9192	20848	516	1377.09	304															4								93
318	U1356	A	73	R	4	W	18	20	693.85	693.87	693.86	9.5698	20848	721	54.3875	18															1								4
318	U1356	A	75	R	2	W	18	20	710.12	710.14	710.13	9.8116	20848			4
318	U1356	A	75	R	3	W	18	20	711.55	711.57	711.56	9.867	20848	706	329.206	110																							25
318	U1356	A	76	R	2	W	20	22	719.64	719.66	719.65	9.4712	20848	635	447.173	129						1																	26
318	U1356	A	76	R	4	W	18	20	722.37	722.39	722.38	9.6336	20848	383	45.203	8																							2
318	U1356	A	76	R	5	W	31	33	723.88	723.9	723.89	9.56	20848	614	227.31	64																						2	9
318	U1356	A	77	R	CC	W	24	26	728.27	728.29	728.28	9.6219	20848	999	221.227	102																							25
318	U1356	A	78	R	2	W	20	22	739.04	739.06	739.05	9.5036	20848	999	149.321	68																							1						1	5
318	U1356	A	78	R	4	W	20	23	741.44	741.47	741.455	9.3178	20848	919	365.197	150																					1	5	18							1
318	U1356	A	79	R	1	W	18	20	747.18	747.2	747.19	9.6152	20848	999	65.1121	30		1
318	U1356	A	79	R	4	W	18	20	751.54	751.56	751.55	9.8035	20848	634	315.298	94																					11		3
318	U1356	A	79	R	5	W	15	18	753	753.03	753.015	9.5512	20848			3
318	U1356	A	82	R	1	W	80	84	776.6	776.64	776.62	9.3419	20848	525	454.835	107																						3	40
318	U1356	A	82	R	2	W	40	44	777.6	777.64	777.62	9.3616	20848	740	502.573	167																							111
318	U1356	A	82	R	3	W	40	44	778.94	778.98	778.96	9.474	20848	766	338.988	118															1							1	88
318	U1356	A	82	R	4	W	40	44	780.28	780.32	780.3	9.019	20848	905	393.349	154																							96	1	3
318	U1356	A	82	R	5	W	40	44	781.52	781.56	781.54	9.4885	20848	538	151.108	37																							6
318	U1356	A	82	R	6	W	40	44	782.7	782.74	782.72	9.2629	20848	354	95.3686	15																						1
318	U1356	A	83	R	1	W	33	36	785.83	785.86	785.845	9.1732	20848			6
318	U1356	A	84	R	1	W	5	9	795.15	795.19	795.17	15.0094	20848	977	261.592	184																							100
318	U1356	A	84	R	1	W	20	24	795.3	795.34	795.32	14.1603	20848	372	51.4508	13																							5
318	U1356	A	84	R	1	W	44	48	795.54	795.58	795.56	9.0864	20848	477	870.628	181																				3		23	32
318	U1356	A	84	R	1	W	61	65	795.71	795.75	795.73	14.5037	20848	589	539.34	221																							121
318	U1356	A	84	R	1	W	79	83	795.89	795.93	795.91	14.1988	20848	616	545.843	229																							139
318	U1356	A	84	R	1	W	100	104	796.1	796.14	796.12	14.3701	20848	1690	113.316	132															2								33
318	U1356	A	84	R	1	W	120	124	796.3	796.34	796.32	14.3116	20848	308	411.476	87																							62
318	U1356	A	84	R	2	W	2	6	796.51	796.55	796.53	14.464	20848	516	525.151	188															3					2			90		8
318	U1356	A	84	R	2	W	18	22	796.67	796.71	796.69	14.4916	20848	808	382.803	215							1								2					1			110		22
318	U1356	A	84	R	2	W	39	43	796.88	796.92	796.9	9.509	20848	513	854.756	200															2								22						1	1
318	U1356	A	84	R	2	W	61	65	797.1	797.14	797.12	14.9363	20848	970	116.556	81															1								32
318	U1356	A	84	R	2	W	80	84	797.29	797.33	797.31	14.5009	20848	301	735.569	154															3								102		2
318	U1356	A	84	R	2	W	100	104	797.49	797.53	797.51	14.5888	20848	444	946.257	294																							168
318	U1356	A	84	R	2	W	120	124	797.69	797.73	797.71	10.2761	20848	608	850.889	255															3								116		1
318	U1356	A	84	R	2	W	140	144	797.89	797.93	797.91	13.0311	20848	563	775.778	273															4								122
318	U1356	A	84	R	3	W	0	4	798	798.04	798.02	12.4464	20848	750	247.903	111																							65
318	U1356	A	84	R	3	W	19	23	798.19	798.23	798.21	11.5213	20848	987	218.169	119																							59
318	U1356	A	84	R	3	W	38	42	798.38	798.42	798.4	8.8481	20848	510	180.181	39															1								11
318	U1356	A	84	R	3	W	60	64	798.6	798.64	798.62	11.8642	20848	464	988.436	261																							118
318	U1356	A	84	R	3	W	100	104	799	799.04	799.02	11.8891	20848	657	723.301	271																							171		2
318	U1356	A	84	R	3	W	120	124	799.2	799.24	799.22	12.5058	20848	741	548.94	244																							108
318	U1356	A	84	R	3	W	140	144	799.4	799.44	799.42	9.5067	20848	1314	580.789	348																							85
318	U1356	A	84	R	4	W	0	4	799.49	799.53	799.51	10.1351	20848	658	881.576	282															1								148
318	U1356	A	84	R	4	W	20	24	799.69	799.73	799.71	10.5669	20848	1183	270.176	162																							88
318	U1356	A	84	R	4	W	40	44	799.89	799.93	799.91	8.9859	20848	704	346.035	105															3					2		1	28
318	U1356	A	84	R	4	W	59	63	800.08	800.12	800.1	10.1128	20848	1548	179.786	135																							67		1				1
318	U1356	A	84	R	4	W	80	84	800.29	800.33	800.31	11.1128	20848	382	952.751	194																							16
318	U1356	A	84	R	4	W	100	104	800.49	800.53	800.51	9.8376	20848	673	733.696	233																							35
318	U1356	A	84	R	4	W	120	124	800.69	800.73	800.71	12.2158	20848	543	763.746	243																							39
318	U1356	A	84	R	4	W	140	144	800.89	800.93	800.91	13.8752	20848	647	524.843	226		1																					82
318	U1356	A	84	R	5	W	0	4	800.99	801.03	801.01	11.9156	20848	1222	325.015	227		1																		1			76
318	U1356	A	84	R	5	W	20	24	801.19	801.23	801.21	18.096	20848	231	1072.28	215																							18
318	U1356	A	84	R	5	W	40	44	801.39	801.43	801.41	9.421	20848	429	995.56	193															1					2			13
318	U1356	A	84	R	5	W	59	63	801.58	801.62	801.6	12.164	20848	485	805.714	228																							56
318	U1356	A	84	R	5	W	80	84	801.79	801.83	801.81	12.1416	20848	412	1116.93	268																							64
318	U1356	A	84	R	5	W	100	104	801.99	802.03	802.01	12.0219	20848	382	1103.15	243															2								71		1
318	U1356	A	84	R	5	W	120	124	802.19	802.23	802.21	12.8031	20848	329	1257.15	254																							66		2
318	U1356	A	84	R	5	W	140	144	802.39	802.43	802.41	14.7093	20848	710	554.956	278										1										9			80
318	U1356	A	84	R	6	W	0	4	802.47	802.51	802.49	19.7529	20848	514	599.588	292		1																					7									3
318	U1356	A	84	R	6	W	20	24	802.67	802.71	802.69	13.3613	20848	631	769.036	311											1												51
318	U1356	A	84	R	6	W	40	44	802.87	802.91	802.89	9.1664	20848	294	1725.14	223																					5		23							1
318	U1356	A	84	R	6	W	59	63	803.06	803.1	803.08	12.6898	20848	535	881.328	287																							75
318	U1356	A	84	R	6	W	80	84	803.27	803.31	803.29	19.7948	20848	557	489.731	259																							63
318	U1356	A	84	R	6	W	100	104	803.47	803.51	803.49	15.9785	20848	332	1033.58	263																							47
318	U1356	A	84	R	7	W	0	4	803.58	803.62	803.6	16.3295	20848	284	1177.81	262		1													1								50
318	U1356	A	84	R	7	W	20	24	803.78	803.82	803.8	14.8971	20848	492	731.022	257															1								35
318	U1356	A	84	R	7	W	40	44	803.98	804.02	804	9.3853	20848	656	643.378	190															3						4		48
318	U1356	A	84	R	7	W	60	64	804.18	804.22	804.2	12.4209	20848	912	428.817	233															2								47		1
318	U1356	A	85	R	1	W	20	24	804.9	804.94	804.92	14.144	20848	1003	129.322	88																							33		2
318	U1356	A	85	R	1	W	40	44	805.1	805.14	805.12	9.7571	20848		0	0
318	U1356	A	85	R	1	W	60	64	805.3	805.34	805.32	13.5576	20848	904	49.33	29										1
318	U1356	A	85	R	1	W	80	84	805.5	805.54	805.52	11.8421	20848	1625	173.341	160															1								59		7
318	U1356	A	85	R	1	W	100	104	805.7	805.74	805.72	10.2683	20848	1317	66.2901	43
318	U1356	A	85	R	1	W	119	123	805.89	805.93	805.91	11.3737	20848	557	13.1634	4
318	U1356	A	85	R	2	W	0	4	805.98	806.02	806	14.4753	20848	1307	40.7721	37															1								14		2
318	U1356	A	85	R	2	W	20	24	806.18	806.22	806.2	13.4381	20848	793	428.447	219																							144		6
318	U1356	A	85	R	2	W	43	47	806.41	806.45	806.43	9.1452	20848	163	3538.38	253															1								69		3
318	U1356	A	85	R	2	W	56	60	806.54	806.58	806.56	16.2178	20848	550	556.271	238																							151		25
318	U1356	A	85	R	2	W	96	100	806.94	806.98	806.96	14.5044	20848	220	1489.62	228																							160		23
318	U1356	A	85	R	3	W	0	4	806.99	807.03	807.01	11.1197	20848	300	1274.91	204																							135		5
318	U1356	A	85	R	3	W	20	24	807.19	807.23	807.21	18.0883	20848	200	1613.6	280															3								180		10
318	U1356	A	85	R	3	W	40	44	807.39	807.43	807.41	9.0458	20848	317	1235.97	170										1													73		4
318	U1356	A	85	R	3	W	60	64	807.59	807.63	807.61	15.5349	20848	167	2129.54	265																							147		33
318	U1356	A	85	R	3	W	80	84	807.79	807.83	807.81	17.1874	20848	145	2032.79	243															1								143		22
318	U1356	A	85	R	3	W	100	104	807.99	808.03	808.01	13.567	20848	295	1234.54	237																							141		3
318	U1356	A	85	R	3	W	120	124	808.19	808.23	808.21	16.2619	20848	335	952.901	249																							151		6
318	U1356	A	85	R	3	W	140	144	808.39	808.43	808.41	15.1776	20848	245	1872.59	334																							112		9
318	U1356	A	85	R	4	W	0	4	808.49	808.53	808.51	13.8281	20848	407	1055.73	285																							117		3
318	U1356	A	85	R	4	W	20	24	808.69	808.73	808.71	13.8309	20848	284	1385.28	261															4								109		3
318	U1356	A	85	R	4	W	40	44	808.89	808.93	808.91	9.3388	20848	490	1075.2	236															2								63		1
318	U1356	A	85	R	4	W	60	64	809.09	809.13	809.11	12.9503	20848	610	757.42	287																				1			124		1
318	U1356	A	85	R	4	W	80	84	809.29	809.33	809.31	12.2432	20848	371	1124.51	245																							119		1
318	U1356	A	85	R	4	W	100	104	809.49	809.53	809.51	15.3822	20848	335	999.305	247																							142		2
318	U1356	A	85	R	4	W	121	125	809.7	809.74	809.72	12.1427	20848	516	838.494	252																							121
318	U1356	A	85	R	4	W	140	144	809.89	809.93	809.91	14.009	20848	800	448.316	241		1																					87		2
318	U1356	A	85	R	5	W	0	4	809.99	810.03	810.01	12.3056	20848	385	1170.53	266																							184		3
318	U1356	A	85	R	5	W	20	24	810.19	810.23	810.21	19.4119	20848	434	633.5	256																							123
318	U1356	A	85	R	5	W	39	46	810.38	810.45	810.415	9.2669	20848	969	564.173	243																							47		1
318	U1356	A	85	R	5	W	57	61	810.56	810.6	810.58	14.1044	20848	694	577.191	271																							169
318	U1356	A	85	R	5	W	80	84	810.79	810.83	810.81	13.2255	20848	691	570.314	250																				1			118		3
318	U1356	A	85	R	5	W	100	104	810.99	811.03	811.01	19.5427	20848	510	506.203	242															2							2	78		4
318	U1356	A	86	R	1	W	40	44	814.7	814.74	814.72	9.3251	20848	537	591.187	142								1															30
318	U1356	A	86	R	2	W	40	44	816.18	816.22	816.2	8.7558	20848	603	323.791	82																						1	8						1
318	U1356	A	86	R	3	W	40	44	817.39	817.43	817.41	8.8347	20848			4
318	U1356	A	86	R	4	W	40	44	818.38	818.42	818.4	9.1531	20848	609	575.97	154										1												3	29
318	U1356	A	86	R	5	W	38	42	819.73	819.77	819.75	8.9484	20848	1010	129.177	56																						2	11
318	U1356	A	86	R	6	W	40	44	821.04	821.08	821.06	9.2667	20848	722	320.951	103																						2	26
318	U1356	A	86	R	7	W	40	44	822.18	822.22	822.2	9.0037	20848	312	920.26	124																							22
318	U1356	A	87	R	1	W	40	44	824.3	824.34	824.32	9.2229	20848	308	1277.01	174																						2	27
318	U1356	A	87	R	2	W	40	44	825.81	825.85	825.83	9.4023	20848	355	331.038	53															1					2		5	8
318	U1356	A	87	R	3	W	40	44	827.32	827.36	827.34	9.014	20848	595	509.215	131																				5			23							1
318	U1356	A	87	R	4	W	40	44	828.47	828.51	828.49	9.0173	20848	684	388.713	115																				3			33
318	U1356	A	87	R	5	W	40	44	829.97	830.01	829.99	9.2431	20848	318	929.161	131																							12
318	U1356	A	87	R	6	W	40	44	831.47	831.51	831.49	9.3622	20848	358	690.441	111															1								52
318	U1356	A	87	R	7	W	40	44	832.66	832.7	832.68	9.1276	20848	711	218.448	68																							37
318	U1356	A	88	R	1	W	61	65	834.11	834.15	834.13	9.0557	20848	353	1160.88	178																				4			63
318	U1356	A	88	R	2	W	98	102	835.84	835.88	835.86	9.1581	20848	387	823.524	140																							75
318	U1356	A	89	R	1	W	44	48	843.54	843.58	843.56	9.2782	20848	619	849.427	234																							51
318	U1356	A	89	R	2	W	39	43	844.8	844.84	844.82	9.1532	20848	329	872.3	126																							54
318	U1356	A	89	R	3	W	40	44	846.11	846.15	846.13	9.352	20848	504	619.238	140																							79
318	U1356	A	89	R	4	W	40	44	847.4	847.44	847.42	9.4908	20848	421	840.05	161											1												86
318	U1356	A	89	R	5	W	38	42	848.63	848.67	848.65	9.2311	20848	297	859.277	113																							65
318	U1356	A	91	R	3	W	24	28	864.64	864.68	864.66	16.2	20848	463	619.831	223																							68
318	U1356	A	91	R	4	W	104	108	866.74	866.78	866.76	16.5	20848	156	571.012	70.5																							19
318	U1356	A	91	R	5	W	1	5	866.8	866.84	866.82	15.76	20848	272	761.121	156.5																							48
318	U1356	A	91	R	7	W	60	63	869.71	869.74	869.725	15.5	20848	211	497.216	78																							11
318	U1356	A	92	R	1	W	64	68	872.54	872.58	872.56	19.214	20848	398	696.553	255.5																							94
318	U1356	A	92	R	2	W	44	48	873.5	873.54	873.52	19.45	20848	309	409.325	118																							56
318	U1356	A	92	R	2	W	84	88	873.9	873.94	873.92	19.6924	20848	473	326.782	146																							71
318	U1356	A	92	R	3	W	44	48	874.46	874.5	874.48	19.9214	20848	494	223.496	105.5																							62
318	U1356	A	93	R	1	W	6	10	876.66	876.7	876.68	16.25	20848	526	214.639	88																							45
318	U1356	A	93	R	1	W	44	48	877.04	877.08	877.06	16.91	20848	477	275.266	106.5		1																					41
318	U1356	A	93	R	1	W	64	68	877.24	877.28	877.26	19.26	20848	470	118.609	51.5																							20
318	U1356	A	93	R	1	W	104	108	877.64	877.68	877.66	14.929	20848	477	197.615	67.5																							31
318	U1356	A	93	R	2	W	4	8	877.99	878.03	878.01	19.904	20848	286	364.402	99.5															1								36
318	U1356	A	93	R	2	W	44	48	878.39	878.43	878.41	15.698	20848	227	775.193	132.5																							18
318	U1356	A	93	R	3	W	44	48	879.49	879.53	879.51	18.52	20848	574	364.774	186																							60							2
318	U1356	A	93	R	3	W	103	107	880.08	880.12	880.1	17.2649	20848	381	751.145	237						2		2		1													26									2
318	U1356	A	94	R	1	W	12	16	881.52	881.56	881.54	17.5845	20848	172	3201.78	464.5		1									1																					6
318	U1356	A	94	R	1	W	64	68	882.04	882.08	882.06	15.4997	20848	211	1909.22	299.5									1	6	1												9									10
318	U1356	A	94	R	1	W	101	105	882.41	882.45	882.43	19.4004	20848	201	328.801	61.5																							26
318	U1356	A	94	R	1	W	144	148	882.84	882.88	882.86	17	20848	284	1329.99	308		1								1													28									13
318	U1356	A	94	R	2	W	6	10	882.94	882.98	882.96	15.5702	20848	550	733.998	301.5																							118
318	U1356	A	94	R	2	W	40	44	883.28	883.32	883.3	17.96	20848	378	750.836	244.5						1		1							1								14						2			1
318	U1356	A	94	R	2	W	83	87	883.71	883.75	883.73	18.43	20848	127	2623.13	294.5						2			1.5				1																			5
318	U1356	A	94	R	2	W	104	108	883.92	883.96	883.94	16.48	20848	405	481.031	154											1												1									4
318	U1356	A	94	R	3	W	24	28	884.55	884.59	884.57	19.66	20848	451	506.701	215.5		0.5								1													42									1
318	U1356	A	94	R	3	W	44	48	884.75	884.79	884.77	12.78	20848	216	2039.12	270								3						1	1								3
318	U1356	A	94	R	3	W	124	128	885.55	885.59	885.57	19.892	20848	298	1102.57	313.5										6													42									1
318	U1356	A	94	R	4	W	4	8	885.67	885.71	885.69	18.98	20848	410	586.717	219								1		1													25									3
318	U1356	A	94	R	4	W	44	48	886.07	886.11	886.09	20.1	20848	290	895.938	250.5						1				2													40									12
318	U1356	A	94	R	4	W	64	68	886.27	886.31	886.29	15.94	20848	339	966.461	250.5		1								1													15									9
318	U1356	A	94	R	4	W	84	88	886.47	886.51	886.49	18.02	20848	308	726.842	193.5									2	2				1									10									6
318	U1356	A	95	R	1	W	24	27	891.24	891.27	891.255	15.7411	20848	394	485.737	144.5						1				0.5													29									1
318	U1356	A	95	R	1	W	64	67	891.64	891.67	891.655	13.2284	20848	529	467.736	157															1								4									4.5
318	U1356	A	95	R	1	W	104	107	892.04	892.07	892.055	17.95	20848	518	91.9293	41																							16
318	U1356	A	95	R	1	W	144	147	892.44	892.47	892.455	12.886	20848	648	493.104	197.5																							26
318	U1356	A	95	R	2	W	24	27	892.72	892.75	892.735	12.2027	20848	775	594.108	269.5						1				4													27									4
318	U1356	A	95	R	2	W	60	64	893.08	893.12	893.1	12.4036	20848	238	2069.22	293						0.5		1		1.5					1								20									1
318	U1356	A	95	R	2	W	90	94	893.38	893.42	893.4	11.63	20848	478	676.915	180.5								1		1													19									2
318	U1356	A	95	R	2	W	124	127	893.72	893.75	893.735	11.3817	20848	168	2376.86	218						1		1		1	3
318	U1356	A	95	R	3	W	14	17	894	894.03	894.015	13.4481	20848	97	5385.94	337		1		1		4		2		2					1								5									1
318	U1356	A	95	R	3	W	45	48	894.31	894.34	894.325	13.903	20848	520	728.138	252.5										2.5													19									2
318	U1356	A	95	R	3	W	82	85	894.68	894.71	894.695	14.9022	20848	300	1410.65	302.5					0.5			3						1									20									2
318	U1356	A	95	R	3	W	106	109	894.92	894.95	894.935	16.14	20848	30	11603.8	269.5						4			1	4													2
318	U1356	A	95	R	4	W	4	7	894.99	895.02	895.005	14.3683	20848	26	21541.4	386						1				6.5													2									2	1
318	U1356	A	95	R	4	W	22	25	895.17	895.2	895.185	18.7	20848	49	5926.99	260.5																							2									1
318	U1356	A	95	R	4	W	43	46	895.38	895.41	895.395	14.2265	20848	62	8426.25	356.5	1	14			0.5			4		3		1											3
												13.97
												13.6188
												16.62
												13.1799
												3.48862
[truncated: 194 more columns]

## Sheet: Table 1 stratigraphy GTS12
	type	FO/LO	Genus, chron	age (Gradstein 2012)	top core	top interval	bottom core	bottom interval	depth average	error		Table 1
	CONOP			10.76					98.66
	CONOP			10.92					133.8
	CONOP			13.406					133.81
	PM	(o)	C5ACn	14.07	22R-2,	75	22R-2,	90	203.225	0.075
	PM	(y)	C5Bn.2n	15.032	30R-2,	50	30R-2,	75	279.625	0.125
	PM	(o)	C5Cn.1n	16.268	39R-1,	35	39R-1,	65	364.1	0.15
	PM	(o)	C5Cn.3n	16.721	42R-2,	59	43R-1,	25	398.275	3.975
				17.5	44R-CC		45R-CC		416.9
				23	44R-CC		45R-CC		416.91
	PM	(o)	C6Cn.2n	23.03	45R-CC	40	46R-1	65	426.78	5
	PM	(o)	C6Cn.3n	23.3	50R-1,	0			469	9
	PM	(y)	C7An	24.761	63R-3,	85	63R-3,	120	597.115	0.175
	PM	(o)	C7An	24.984	64R-1,	130	64R-1,	135	604.325	0.025
	PM	(o)	C8n.1n	25.264	68R-2,	20	68R-2,	75	643.375	0.275
	PM	(y)	C8n.2n	25.304	69R-2,	20	69R-2,	25	652.575	0.025
	PM	(o)	C8n.2n	25.987	71R-6,	115	72R-1,	10	678.98	0.92
	PM	(y)	C9n	26.42	73R-4,	90	75R-1,	15	701.66	7.09
	PM	(o)	C9n	27.439	76R-6,	35	76R-6,	40	725.085	0.025
	PM	(o)	C11n.2n	29.97	82R-6,	35	82R-6,	40	782.675	0.025
	PM	(y)	C13n	33.157	93R-1,117		93R-2,	28	878	0.23

## Sheet: Table 2
in Salabarnada et al. (submitted this volume)	in this paper		Table 2
Laminated facies "F1"	Laminated siltstones
	Laminated sandstones
Bioturbated facies "F2"	Bioturbated carbonate-rich
	Pelagic clays
Carbonate cemented beds	Carbonate cemented beds
Turbidites and hemipelagites	Miocene deposits
Slumps facies	Mass-waste deposits
Debris flows facies
EOT facies
Eocene sands facies	Glauconite sandstones

## Sheet: Table 3 species list
In situ taxa		Reworked taxa		Table 3
Adnatosphaeridium? sp.		Achilleodinium biformoides
Ataxodinium choane		Achomosphaera alcicornu
Batiacasphaera compta		Aiora fenestrata
Batiacasphaera spp. (pars.)		Aireiana verrucosa
Batiacasphaera hirsuta		Adnatosphaeridium spp.
Batiacasphaera micropapillata		Alisocysta circumtabulata
Batiacasphaera minuta		Alterbidinium distinctum
Batiacasphaera sphaerica		Apectodinium spp.
Batiacasphaera sp. A		Arachnodinium antarcticum
Batiacasphaera sp. B		Areoligera spp. (pars)
Batiacasphaera sp. C		Areoligera semicirculata
Batiacasphaera sp. D		Cerebrocysta bartonensis
Brigantedinium simplex		Charlesdowniea clathrata
Brigantedinium pynei		Charlesdowniea edwardsii
Brigantedinium sp. A		Cooksonidinium capricornum
Brigantedinium sp. B		Cordosphaeridium fibrospinosum
Brigantedinium sp. C		Cordosphaeridium furniculatum
Brigantedinium sp. D		Corrudinium incompositum
Cerebrocysta WR small		Corrudinium regulare
Cerebrocysta delicata		Cribroperidinium spp.
Cerebrocysta sp. A		Damassadinium crassimuratum
Cleistosphaeridium sp. B		Dapsilidinium spp.
Cleistosphaeridium sp.A		Deflandrea sp. A sensu Brinkhuis et al., 2003
Cordosphaeridium minutum		Deflandrea antarctica
Corrudinium labradori		Deflandrea cygniformis
Corrudinium sp. A		Diphyes colligerum
Cryodinium? sp.		Deflandrea spp. Indet
Distatodinium spp.		Eisenackia circumtabulata
Edwardsiella sexispinosa		Enneadocysta diktyostila
Elytrocysta sp. A		Enneadocysta multicornuta
Elytrocysta brevis		Eocladopyxis tesselata
Gelatia inflata		Fibrocysta axialis
Habibacysta? spp.		Glaphyrocysta intricta
Homotryblium spp.		Glaphyrocysta pastielsii
Hystrichokolpoma bullatum		Heteraulacacysta leptalea
Huystrichosphaeropsis obscura		Histiocysta palla
Impagidinium spp. (pars)		Hystrichokolpoma pusilla
Impagidinium aculeatum		Hystrichokolpoma rigaudiae
Impagidinium cantabrigiense		Hystrichokolpoma truncatum
Impagidinium elegans		Hystrichosphaeridium truswelliae
Impagidinium elongatum		Hystrichosphaeridium tubiferum
Impagidinium pacificum		Impagidinium maculatum
Impagidinium pallidum		Impagidinium waipawense
Impagidinium paradoxum		Kenleyia spp.
Impagidinium patulum		Manumiella druggii
Impagidinium plicatum		Melitasphaeridium pseudorecurvatum
Impagidinium velorum		Membranophoridium perforatum
Impagidinium victorianum		Octodinium askiniae
Impagidinium sp. A		Odontochitina spp.
Impagidinium sphaericum		Operculodinium spp.
Invertocysta tabulata		Phthanoperidinium antarcticum
Islandinium spp.		Phthanoperidinium echinatum
Lejeunecysta attenuata		Polysphaeridium spp.
Lejeunecysta adeliense		Rhombodinium sp.
Lejeunecysta fallax		Schematophora speciosa
Lejeunecysta cowei		Schematophora obscura
Lejeunecysta acuminata		Senegalinium spp.
Lejeunecysta rotunda		Spinidinium luciae
Lejeunecysta katatonos		Spinidinium macmurdoense
Malvinia escutiana		Spinidinium schellenbergii
Nematosphaeropsis labyrinthus		Spiniferites ramosus CPX
Oligokolpoma galeotti		Thalassiphora pelagica
Operculodinium tiara		Turbiosphaera filosa
Operculodinium sp. A		Turbiosphaera sagena
Operculodinium piaseckii		Vozzhennikovia apertura/ S.schellenbergii group
Operculodinium janduchenei		Vozzhennikovia netrona
Operculodinium cf eirikianum		?Vozzhenikovia LARGE
Operculodinium eirikianum		Wetzeliella articulata
Paleocystodinium golzowense
Paucisphaeridium spp.
Phthanoperidinium amoenum
Pyxidinopsis spp. (pars)
Pyxidinopsis sp. A
Pyxidinopsis sp. B
Pyxidinopsis sp. C
Pyxidinopsis sp. D
Pyxidinopsis vesciculata
Pyxidinopsis tuberculata
Pyxidinopsis reticulata
Pyxidinopsis fairhavensis
Reticulatosphaera actinocoronata
Selenopemphix antarctica
Selenopemphix nephroides
Selenopemphix dioneacysta
Selenopemphix sp. A
Selenopemphix undulata
Selenopemphix brinkhuisi
Spiniferites sp. B
Spiniferites sp. A
Spiniferites sp. C
Stoveracysta ornata
Stoveracysta kakanuiensis
?Svalbardella spp.
Tectatodinium spp.
Unipontedinium aquaeductus
Protoperidinioid indet
Protoperidinium sp. B
Protoperidinium sp. A
Protoperidinium sp. C
Protoperidinium sp. D

## Sheet: d18Obenthic
Site	GTS2012 (y) (ref)	77 d18O adj.*	9pnt MA
926	9.44956	2.67	2.766
926	9.45444	2.84	2.77167
926	9.4585	2.74	2.74286
926	9.46337	2.76	2.73375
588	9.46443	2.82	2.77625
926	9.46744	2.8	2.78625
926	9.47231	2.57	2.79125
926	9.47638	2.67	2.81125
926	9.48044	3.01	2.81625
926	9.48938	2.92	2.81
926	9.49425	2.78	2.84375
926	9.49831	2.92	2.8575
926	9.49912	2.86	2.85875
926	9.50319	2.75	2.83625
926	9.504	2.84	2.86125
926	9.50725	2.78	2.845
926	9.50887	3.02	2.8275
926	9.51212	2.74	2.85
926	9.51375	2.98	2.8225
926	9.51619	2.79	2.7975
588	9.51928	2.72	2.735
926	9.52106	2.93	2.7475
926	9.52594	2.62	2.755
926	9.52919	2.58	2.74875
926	9.53081	2.52	2.75625
926	9.53894	2.84	2.71125
926	9.54462	3.04	2.70125
926	9.55031	2.74	2.70375
926	9.55681	2.78	2.70875
926	9.56331	2.57	2.705
926	9.569	2.54	2.6625
588	9.57412	2.6	2.61
926	9.5755	2.56	2.605
926	9.582	2.81	2.6275
926	9.58687	2.7	2.66
926	9.59256	2.32	2.69625
926	9.59825	2.74	2.82875
926	9.60394	2.75	2.78
926	9.60962	2.8	2.74625
926	9.6145	2.89	2.82
926	9.621	3.62	2.83625
926	9.62669	2.42	2.84375
588	9.62896	2.43	2.825
926	9.63319	2.91	2.8125
926	9.63969	2.87	2.685
926	9.64619	2.81	2.71875
926	9.65416	2.65	2.7175
926	9.67326	2.79	2.64875
926	9.68281	2.6	2.61125
926	9.68281	2.69	2.5675
588	9.684	2.42	2.59875
926	9.69116	2.36	2.59875
926	9.70071	2.57	2.61
588	9.70513	2.46	2.615
926	9.70787	2.9	2.64875
926	9.72233	2.79	2.70375
926	9.72564	2.69	2.725
926	9.72962	2.73	2.77125
926	9.73294	2.69	2.745
926	9.73692	2.8	2.73875
926	9.7409	2.74	2.71375
926	9.74421	2.83	2.69375
926	9.75217	2.69	2.6975
926	9.75217	2.74	2.65125
926	9.75615	2.49	2.65
926	9.76013	2.57	2.59625
926	9.76411	2.72	2.5675
588	9.7665	2.43	2.57125
926	9.76743	2.73	2.605
926	9.77141	2.4	2.56625
926	9.77937	2.46	2.555
926	9.78335	2.77	2.5975
926	9.7881	2.76	2.575
588	9.87214	2.26	2.59125
588	9.99515	2.63	2.62
588	10.1182	2.77	2.59625
588	10.2411	2.55	2.57
588	10.3641	2.53	2.58625
588	10.4215	2.69	2.53875
588	10.5445	2.58	2.52125
588	10.6675	2.55	2.52125
588	10.7906	2.39	2.4875
588	10.9136	2.25	2.41875
588	11.0076	2.63	2.36625
588	11.0193	2.55	2.36
588	11.024	2.26	2.3325
588	11.0357	2.14	2.39375
588	11.0474	2.16	2.4
926	11.0875	2.5	2.40125
588	11.091	2.17	2.41125
926	11.0997	2.74	2.44125
926	11.1049	2.68	2.48875
926	11.111	2.56	2.49125
926	11.1172	2.34	2.555
926	11.1233	2.38	2.53375
926	11.1294	2.54	2.4725
926	11.139	2.52	2.4775
926	11.1478	2.68	2.48125
926	11.154	2.57	2.51375
926	11.1612	2.19	2.505
926	11.1674	2.6	2.52875
926	11.1746	2.37	2.52
926	11.1746	2.64	2.525
926	11.1817	2.47	2.56875
926	11.1817	2.71	2.5425
926	11.1891	2.61	2.55375
926	11.1966	2.61	2.51875
926	11.2019	2.54	2.51375
926	11.2084	2.39	2.4375
926	11.2137	2.46	2.39625
926	11.2212	2.36	2.35875
926	11.2309	2.43	2.35875
588	11.2314	2.1	2.4025
926	11.2394	2.28	2.40875
926	11.2512	2.31	2.3875
926	11.2512	2.54	2.41125
926	11.2619	2.74	2.44125
926	11.2834	2.51	2.465
926	11.3059	2.19	2.49375
926	11.322	2.62	2.495
926	11.3284	2.34	2.47875
926	11.337	2.47	2.46625
926	11.3445	2.54	2.50875
926	11.353	2.55	2.495
926	11.3605	2.61	2.47125
926	11.368	2.41	2.445
926	11.3755	2.53	2.40125
926	11.383	2.51	2.39125
926	11.3905	2.15	2.4
588	11.3927	2.26	2.4025
926	11.398	2.19	2.40125
926	11.4034	2.47	2.375
926	11.4088	2.68	2.4275
926	11.413	2.43	2.4725
926	11.4184	2.52	2.4975
926	11.4238	2.3	2.50375
926	11.4334	2.57	2.44125
926	11.4377	2.62	2.43875
926	11.443	2.39	2.42
926	11.4538	2.52	2.44625
588	11.5264	2.18	2.42875
926	11.5631	2.41	2.51875
588	11.579	2.37	2.51
926	11.5856	2.51	2.49875
926	11.5991	2.43	2.62625
926	11.5991	3.34	2.7575
926	11.6074	2.32	2.76125
926	11.6074	2.43	2.75125
926	11.6074	3.2	2.77
926	11.6168	3.46	2.67625
926	11.6251	2.4	2.725
926	11.6345	2.43	2.705
926	11.6535	2.58	2.595
926	11.6609	2.59	2.4475
926	11.6686	2.71	2.46125
926	11.6822	2.27	2.46625
926	11.6968	2.32	2.47125
588	11.7112	2.28	2.48
926	11.7123	2.51	2.49375
926	11.723	2.47	2.53375
926	11.7288	2.62	2.545
926	11.7356	2.66	2.56
926	11.7414	2.82	2.545
926	11.7521	2.59	2.5575
926	11.7618	2.41	2.52125
926	11.7725	2.4	2.5175
926	11.7822	2.39	2.4875
926	11.7899	2.57	2.51375
926	11.7967	2.33	2.47875
926	11.8045	2.63	2.5325
926	11.8113	2.58	2.535
926	11.82	2.8	2.5225
588	11.8305	2.13	2.58
926	11.8307	2.83	2.59125
926	11.8414	2.41	2.565
926	11.8511	2.47	2.50875
926	11.8511	2.79	2.53875
926	11.8617	2.72	2.46
926	11.8773	2.37	2.4525
926	11.885	2.35	2.44
926	11.8918	2.37	2.37
926	11.8996	2.2	2.3725
926	11.9064	2.35	2.39
926	11.92	2.37	2.425
926	11.9287	2.23	2.42625
926	11.9374	2.74	2.4325
926	11.9423	2.51	2.43375
926	11.9549	2.63	2.4175
588	11.9599	2.38	2.4
926	11.9626	2.25	2.33375
588	12.0123	2.36	2.29125
926	12.0507	2.24	2.21875
926	12.056	2.09	2.19875
926	12.0647	2.21	2.25625
926	12.0691	2.17	2.26375
926	12.0735	2.05	2.28375
926	12.0778	2.22	2.3175
926	12.0822	2.71	2.33125
926	12.0866	2.42	2.355
926	12.0901	2.4	2.39125
926	12.0945	2.36	2.38625
926	12.0988	2.32	2.34125
926	12.1032	2.36	2.30625
926	12.1067	2.34	2.28625
926	12.1102	2.18	2.32
588	12.1129	2.35	2.3325
926	12.1146	2.14	2.3075
926	12.1181	2.24	2.29375
926	12.1224	2.63	2.31
926	12.1294	2.42	2.31625
926	12.1364	2.16	2.3525
926	12.1434	2.23	2.3425
926	12.1504	2.31	2.32125
926	12.1574	2.4	2.33375
926	12.1653	2.43	2.37375
926	12.1795	2.16	2.39875
926	12.1943	2.46	2.4325
588	12.1948	2.52	2.45875
926	12.2045	2.48	2.4625
588	12.2988	2.43	2.48625
588	12.3773	2.58	2.46875
588	12.4557	2.61	2.44875
926	12.4985	2.46	2.46375
926	12.5079	2.35	2.45125
926	12.5164	2.32	2.43375
926	12.5258	2.36	2.4225
926	12.5352	2.6	2.4125
926	12.5437	2.33	2.43
588	12.5509	2.44	2.43875
926	12.5531	2.52	2.425
926	12.5626	2.38	2.42
588	12.5635	2.49	2.44
588	12.5708	2.39	2.4075
926	12.5711	2.25	2.405
588	12.5731	2.56	2.415
588	12.5798	2.49	2.39625
926	12.5805	2.18	2.39125
926	12.5899	2.5	2.4225
588	12.5942	2.46	2.41125
926	12.5984	2.34	2.41
926	12.6078	2.35	2.4325
588	12.608	2.5	2.41625
926	12.6172	2.47	2.41375
588	12.6236	2.48	2.4025
926	12.6257	2.36	2.40125
926	12.6351	2.37	2.38625
588	12.6405	2.44	2.395
926	12.6445	2.25	2.36375
926	12.653	2.34	2.39625
588	12.6531	2.38	2.4025
588	12.6609	2.54	2.38375
926	12.6624	2.23	2.36375
588	12.6633	2.62	2.37
588	12.6699	2.42	2.36125
926	12.6719	2.29	2.35125
926	12.6804	2.09	2.37375
588	12.6837	2.39	2.3625
926	12.6898	2.31	2.385
926	12.6898	2.46	2.37875
588	12.6999	2.41	2.425
926	12.703	2.53	2.43625
926	12.703	2.6	2.4475
926	12.7086	2.24	2.45625
926	12.7086	2.46	2.45125
926	12.7086	2.48	2.48375
926	12.7143	2.4	2.46125
588	12.715	2.53	2.46375
926	12.719	2.37	2.4575
926	12.719	2.79	2.4625
588	12.7234	2.42	2.475
926	12.7246	2.26	2.44375
926	12.7246	2.41	2.54125
588	12.73	2.52	2.5
926	12.7303	2.5	2.52375
926	12.7362	2.28	2.55625
926	12.7362	3.15	2.5675
926	12.7432	2.46	2.56375
926	12.7432	2.61	2.57625
588	12.746	2.52	2.5725
588	12.7497	2.5	2.57625
926	12.7502	2.49	2.5775
588	12.7548	2.6	2.57125
926	12.756	2.25	2.53
926	12.756	3.18	2.52
588	12.7579	2.47	2.51
588	12.7579	2.56	2.49375
926	12.763	2.19	2.5025
926	12.763	2.42	2.39
588	12.766	2.41	2.53
926	12.77	2.47	2.50125
588	12.7715	2.32	2.535
926	12.7753	2.28	2.52
926	12.7753	3.59	2.50875
926	12.7797	2.33	2.4875
926	12.7797	2.46	2.50875
588	12.7811	2.3	2.4975
588	12.7828	2.32	2.34375
926	12.785	2.3	2.365
588	12.7889	2.49	2.3325
926	12.7903	2.19	2.36125
588	12.7929	2.36	2.4125
926	12.7947	2.5	2.4375
926	12.7999	2.2	2.40875
926	12.8043	2.53	2.46625
926	12.8096	2.73	2.49125
926	12.8149	2.5	2.4625
926	12.8246	2.26	2.4875
926	12.8303	2.65	2.465
926	12.8382	2.56	2.41375
926	12.8448	2.27	2.4025
926	12.8527	2.4	2.43375
926	12.8606	2.35	2.38375
588	12.8641	2.32	2.3475
926	12.8685	2.41	2.34875
926	12.8778	2.51	2.30625
588	12.8808	2.25	2.30375
926	12.8857	2.27	2.2975
588	12.89	2.28	2.30375
926	12.8921	2.06	2.305
588	12.8922	2.33	2.30125
588	12.8975	2.27	2.30375
588	12.9099	2.46	2.32625
926	12.9148	2.52	2.36625
926	12.919	2.22	2.37375
588	12.925	2.29	2.3725
926	12.9275	2.46	2.36125
588	12.9368	2.38	2.35
926	12.9401	2.39	2.365
926	12.9452	2.26	2.35125
926	12.9511	2.37	2.3725
588	12.9519	2.43	2.36875
926	12.9561	2.34	2.38125
926	12.9612	2.18	2.40625
588	12.9642	2.63	2.42125
926	12.9662	2.35	2.41125
588	12.9707	2.49	2.4175
926	12.9713	2.46	2.43875
588	12.9728	2.49	2.39125
926	12.9747	2.35	2.39
588	12.9788	2.39	2.37625
926	12.9806	2.35	2.3725
926	12.9865	2.25	2.39625
926	12.9915	2.34	2.44
588	12.9922	2.38	2.4575
926	12.9966	2.43	2.4725
926	13.0017	2.68	2.49625
588	13.0051	2.7	2.53375
926	13.0067	2.53	2.53375
926	13.0109	2.47	2.53375
926	13.0151	2.44	2.49375
588	13.0175	2.64	2.46875
926	13.0194	2.38	2.45625
926	13.0236	2.43	2.455
926	13.0286	2.36	2.44625
588	13.0327	2.5	2.4075
926	13.033	2.43	2.4
926	13.0381	2.46	2.3875
926	13.0432	2.37	2.3725
926	13.0483	2.33	2.34875
588	13.0493	2.32	2.33875
926	13.0534	2.33	2.3175
926	13.0585	2.24	2.2875
588	13.0591	2.31	2.3175
588	13.0622	2.35	2.30125
926	13.0636	2.29	2.3125
926	13.0687	2.13	2.34375
588	13.0705	2.57	2.31375
926	13.0728	2.19	2.29625
926	13.0769	2.42	2.28125
926	13.083	2.49	2.3125
588	13.0893	2.07	2.3175
588	13.1082	2.21	2.315
588	13.1248	2.17	2.29375
926	13.1391	2.38	2.24125
926	13.1442	2.61	2.285
588	13.146	2.17	2.2875
926	13.1493	2.25	2.3125
926	13.1585	2.07	2.3075
588	13.1634	2.42	2.25875
926	13.1667	2.23	2.3175
588	13.1724	2.37	2.32875
588	13.1754	2.34	2.35625
926	13.1759	2.22	2.355
926	13.1759	2.64	2.365
588	13.1762	2.34	2.33125
926	13.1841	2.29	2.31625
926	13.1841	2.41	2.315
588	13.1845	2.31	2.28375
588	13.1886	2.1	2.235
588	13.1937	2.22	2.225
926	13.194	2.21	2.2
926	13.194	2.39	2.19875
588	13.1988	1.95	2.21625
588	13.2013	2.21	2.24
588	13.2033	2.21	2.25625
588	13.2039	2.3	2.24125
926	13.204	2.24	2.27
926	13.204	2.41	2.30375
588	13.209	2.34	2.28875
926	13.2139	2.27	2.28
588	13.214	2.18	2.28
588	13.2191	2.48	2.26875
926	13.2239	2.09	2.23375
926	13.2239	2.23	2.2225
588	13.2242	2.24	2.23125
588	13.2294	2.32	2.1775
588	13.2345	2.06	2.195
926	13.2349	2.18	2.17875
926	13.2349	2.25	2.17375
588	13.2395	2.05	2.1275
588	13.2446	2.23	2.1375
926	13.2448	2.1	2.15125
926	13.2448	2.2	2.165
588	13.2497	1.95	2.195
926	13.2537	2.14	2.17
926	13.2537	2.29	2.1725
588	13.2548	2.36	2.17875
588	13.2599	2.29	2.2
926	13.2603	2.03	2.2025
926	13.2603	2.12	2.16375
588	13.2649	2.25	2.175
926	13.2669	2.12	2.17125
588	13.27	2.16	2.2
926	13.2736	1.98	2.1875
588	13.2751	2.45	2.17
588	13.2777	2.26	2.1825
588	13.2797	2.26	2.14625
926	13.2802	2.02	2.16875
588	13.2803	2.11	2.10625
588	13.2854	2.22	2.09875
926	13.2868	1.87	2.095
588	13.2899	2.16	2.14125
926	13.2912	1.95	2.155
588	13.294	2.2	2.14375
588	13.2996	2.23	2.155
926	13.3001	2.39	2.14125
588	13.3051	2.22	2.1625
926	13.3056	2.13	2.16
588	13.3108	1.96	2.135
926	13.3122	2.05	2.105
588	13.3158	2.12	2.11125
926	13.3188	2.18	2.10875
588	13.3209	2.03	2.145
926	13.3243	2.15	2.185
588	13.326	2.27	2.16
588	13.3306	2.11	2.1375
588	13.3363	2.25	2.14375
588	13.3414	2.37	2.135
588	13.3464	1.92	2.11625
588	13.3515	2	2.10875
588	13.3541	2.08	2.05375
588	13.356	2.08	2.01
588	13.3566	2.12	1.99
588	13.3617	2.05	2
588	13.367	1.81	1.98625
588	13.3724	2.02	2
588	13.3778	1.76	1.97375
588	13.3834	2.08	2
588	13.3888	1.97	2.03125
588	13.3942	2.19	2.06125
588	13.3996	1.91	2.14125
588	13.4051	2.26	2.17875
588	13.4105	2.06	2.1975
588	13.4159	2.26	2.185
588	13.4213	2.4	2.215
926	13.4231	2.38	2.20125
588	13.4267	2.12	2.18
588	13.4321	2.09	2.15
588	13.435	2.15	2.0925
588	13.4371	2.15	2.06125
588	13.4431	1.89	2.0325
588	13.4436	2.02	2.0075
588	13.4485	1.94	1.99375
588	13.4566	2.13	1.96375
588	13.4621	1.89	1.95875
588	13.4642	1.89	1.9575
588	13.4648	2.04	1.98
588	13.4702	1.91	2.0025
588	13.4756	1.85	2.06
588	13.4837	2.01	2.10625
588	13.4864	2.12	2.15375
588	13.492	2.31	2.19875
588	13.4974	2.35	2.26125
588	13.5012	2.26	2.3025
588	13.5109	2.42	2.31
588	13.5191	2.27	2.2725
588	13.5245	2.35	2.23
588	13.5299	2.34	2.21
588	13.538	2.18	2.185
588	13.5436	2.01	2.16875
588	13.5457	2.01	2.15125
588	13.5463	2.1	2.1325
588	13.5517	2.22	2.13125
588	13.5571	2.14	2.14125
588	13.5582	2.21	2.13875
588	13.5652	2.19	2.15375
588	13.568	2.17	2.17125
588	13.5734	2.09	2.21
588	13.5788	1.99	2.23375
588	13.5842	2.22	2.24
588	13.5929	2.36	2.26375
588	13.6006	2.45	2.2825
588	13.6065	2.4	2.31375
588	13.61	2.24	2.31
588	13.614	2.36	2.3075
588	13.6178	2.24	2.315
588	13.619	2.24	2.28875
588	13.6193	2.19	2.29
588	13.6225	2.34	2.27625
588	13.6256	2.51	2.2925
588	13.6303	2.19	2.3025
588	13.6318	2.25	2.32875
588	13.635	2.25	2.3225
588	13.6381	2.37	2.3075
588	13.6413	2.32	2.31375
588	13.6459	2.4	2.31625
588	13.6506	2.29	2.31625
588	13.6537	2.39	2.29625
588	13.6569	2.24	2.2875
588	13.6616	2.27	2.23875
588	13.6647	2.25	2.165
588	13.666	2.21	2.12375
588	13.666	2.25	2.12
588	13.67	2.01	2.10875
588	13.6789	1.7	2.045
588	13.6922	2.06	2.02875
588	13.7012	2.21	1.99375
588	13.7047	2.18	2.01875
588	13.7056	1.74	2.08125
588	13.7146	2.08	2.13125
588	13.7235	1.97	2.115
588	13.7342	2.21	2.1225
588	13.742	2.2	2.1475
926	13.7461	2.46	2.185
588	13.7548	2.08	2.20375
926	13.7559	2.24	2.2425
926	13.7603	1.94	2.21125
926	13.7647	2.38	2.215
588	13.7653	2.12	2.25125
926	13.7709	2.52	2.26
588	13.777	1.95	2.28625
926	13.778	2.49	2.2925
926	13.7851	2.37	2.2775
588	13.7945	2.31	2.21
588	13.8119	2.15	2.2475
926	13.8127	2.43	2.1825
588	13.8236	2	2.1325
588	13.8352	1.98	2.0725
588	13.8492	2.25	2.06125
588	13.8643	1.97	1.9775
588	13.869	1.97	1.935
588	13.8702	1.83	1.8825
588	13.8818	2.06	1.8525
588	13.8935	1.76	1.79125
588	13.9074	1.66	1.735
588	13.9167	1.56	1.69875
588	13.9331	2.01	1.67625
588	13.9401	1.48	1.66125
588	13.9517	1.52	1.69
588	13.9634	1.54	1.705
588	13.9739	1.88	1.675
588	14.01	1.64	1.69125
588	14.0239	1.89	1.7475
588	14.0391	1.68	1.7875
588	14.0438	1.77	1.81375
588	14.0566	1.61	1.85125
588	14.0861	1.97	1.84
588	14.1041	1.86	1.85
588	14.1161	2.09	1.85
588	14.1281	1.94	1.9075
588	14.1425	1.8	1.88875
588	14.1521	1.76	1.91125
588	14.1641	1.77	1.88625
588	14.1776	2.07	1.89875
588	14.1912	1.82	1.9125
588	14.2086	2.04	1.95
588	14.2302	1.89	1.96
588	14.2667	2.04	1.94375
588	14.2748	1.91	1.95375
588	14.2923	2.06	1.93375
588	14.2977	1.85	1.95375
588	14.3125	1.94	1.93375
588	14.3166	1.9	1.9175
588	14.3261	1.88	1.87625
588	14.3409	2.05	1.88
588	14.353	1.88	1.8575
588	14.3679	1.78	1.855
588	14.38	1.73	1.85875
588	14.3935	1.88	1.7975
588	14.4097	1.76	1.78375
588	14.4205	1.88	1.78125
588	14.434	1.91	1.805
588	14.4476	1.56	1.79125
588	14.4583	1.77	1.78125
588	14.4786	1.76	1.76875
588	14.4947	1.92	1.75125
588	14.4961	1.77	1.7775
588	14.5002	1.68	1.78125
588	14.515	1.78	1.75
588	14.5176	1.77	1.71375
588	14.5244	1.77	1.6775
588	14.5379	1.8	1.66125
588	14.5487	1.51	1.61875
588	14.5555	1.63	1.61125
588	14.5703	1.48	1.62
588	14.5825	1.55	1.62625
588	14.5959	1.44	1.65
588	14.6129	1.71	1.62875
588	14.621	1.84	1.64625
588	14.6326	1.85	1.66625
588	14.6441	1.7	1.68
588	14.6581	1.46	1.66
588	14.672	1.62	1.64125
588	14.6848	1.71	1.62875
588	14.6894	1.55	1.63125
588	14.6894	1.55	1.62875
588	14.6952	1.69	1.64375
588	14.7044	1.75	1.65
588	14.7195	1.72	1.65375
588	14.7311	1.44	1.65375
588	14.7369	1.74	1.65125
588	14.7474	1.76	1.64625
588	14.7485	1.58	1.63375
588	14.7497	1.55	1.65
588	14.7601	1.67	1.63
588	14.7717	1.71	1.60487
588	14.7892	1.62	1.61987
588	14.8017	1.57	1.63175
588	14.8174	1.58	1.639
U1337	14.837	1.559	1.608
588	14.8408	1.7	1.60125
U1337	14.842	1.645	1.6175
U1337	14.847	1.728	1.61287
U1337	14.852	1.462	1.5935
U1337	14.856	1.566	1.53787
588	14.8563	1.7	1.47338
U1337	14.861	1.543	1.42087
U1337	14.866	1.404	1.44812
U1337	14.871	1.255	1.41987
U1337	14.876	1.129	1.397
U1337	14.881	1.308	1.37787
588	14.8856	1.68	1.38512
U1337	14.886	1.34	1.44575
U1337	14.891	1.517	1.47738
588	14.8947	1.39	1.55137
U1337	14.895	1.462	1.50337
588	14.8979	1.74	1.55837
U1337	14.9	1.382	1.51487
588	14.9021	1.9	1.55738
U1337	14.905	1.296	1.53625
588	14.9079	1.78	1.56125
U1337	14.91	1.169	1.57725
588	14.9116	1.73	1.5435
U1337	14.915	1.293	1.57837
588	14.9152	1.94	1.57087
588	14.9173	1.51	1.57475
588	14.9184	1.63	1.5585
U1337	14.92	1.575	1.56575
588	14.9231	1.72	1.494
U1337	14.925	1.2	1.51775
588	14.9284	1.6	1.54525
U1337	14.93	1.351	1.478
U1337	14.934	1.366	1.48675
588	14.9352	1.7	1.52562
588	14.9389	1.85	1.56437
U1337	14.939	1.037	1.51262
588	14.9426	1.79	1.54062
U1337	14.944	1.511	1.47137
588	14.9473	1.91	1.44887
U1337	14.949	0.937	1.52775
588	14.9521	1.59	1.519
U1337	14.954	1.146	1.50975
588	14.9547	1.67	1.47975
U1337	14.959	1.668	1.53925
588	14.961	1.72	1.523
U1337	14.964	1.437	1.59725
588	14.9652	1.67	1.5435
U1337	14.968	1.413	1.5425
U1337	14.973	1.46	1.525
588	14.9741	1.74	1.48513
U1337	14.978	1.24	1.48388
588	14.9784	1.66	1.49412
588	14.981	1.58	1.51512
U1337	14.983	1.118	1.46888
588	14.9862	1.66	1.48513
U1337	14.988	1.495	1.44263
U1337	14.993	1.628	1.44688
588	14.9941	1.37	1.51588
588	14.9962	1.37	1.4925
588	14.9973	1.32	1.48113
U1337	14.998	1.614	1.48887
588	15.0025	1.67	1.46925
U1337	15.003	1.473	1.528
U1337	15.007	1.404	1.54425
588	15.0078	1.69	1.5425
U1337	15.012	1.213	1.55038
588	15.0141	1.84	1.5725
U1337	15.017	1.45	1.55038
588	15.0178	1.6	1.58663
U1337	15.022	1.733	1.60013
588	15.0257	1.65	1.59888
U1337	15.027	1.227	1.62288
588	15.0283	1.98	1.61537
U1337	15.032	1.321	1.553
588	15.0336	1.83	1.52675
U1337	15.037	1.642	1.53425
588	15.0399	1.54	1.47437
U1337	15.042	1.234	1.553
588	15.0442	1.44	1.5165
U1337	15.046	1.287	1.52875
U1337	15.051	1.501	1.52238
588	15.0532	1.95	1.57937
U1337	15.056	1.538	1.60062
588	15.06	1.74	1.59875
U1337	15.061	1.489	1.64487
588	15.0627	1.69	1.55025
588	15.0653	1.61	1.54925
U1337	15.066	1.272	1.543
588	15.0664	1.87	1.54812
U1337	15.071	1.193	1.47288
588	15.0733	1.53	1.47038
588	15.0738	1.69	1.4425
588	15.0754	1.53	1.43
U1337	15.077	1.088	1.43962
588	15.0801	1.59	1.46712
U1337	15.081	1.049	1.48462
588	15.0865	1.77	1.46837
U1337	15.087	1.27	1.52
588	15.0897	1.75	1.50625
588	15.0918	1.83	1.55312
588	15.0928	1.4	1.49587
U1337	15.093	1.501	1.505
588	15.0997	1.48	1.42687
U1337	15.1	1.424	1.39225
U1337	15.106	1.312	1.422
U1337	15.113	1.343	1.4245
U1337	15.119	1.125	1.41663
U1337	15.125	1.553	1.39038
U1337	15.131	1.638	1.3875
U1337	15.138	1.521	1.42463
U1337	15.144	1.417	1.4735
U1337	15.15	1.214	1.44737
U1337	15.156	1.289	1.37837
U1337	15.162	1.64	1.3895
U1337	15.169	1.516	1.3515
U1337	15.175	1.344	1.29475
U1337	15.181	1.086	1.27588
588	15.1855	1.61	1.237
U1337	15.187	1.113	1.24375
U1337	15.193	0.76	1.302
U1337	15.198	1.138	1.30125
U1337	15.204	1.329	1.29625
588	15.2056	1.57	1.30912
588	15.2062	1.81	1.34925
U1337	15.208	1.08	1.35875
588	15.2082	1.57	1.41888
U1337	15.214	1.216	1.38113
U1337	15.219	1.081	1.286
U1337	15.224	1.214	1.29788
588	15.2262	1.81	1.29138
U1337	15.229	1.268	1.37062
U1337	15.233	1.049	1.45025
U1337	15.24	1.175	1.5135
U1337	15.247	1.518	1.453
U1337	15.254	1.85	1.49275
U1337	15.261	1.718	1.53538
588	15.2638	1.72	1.59725
U1337	15.268	1.326	1.545
U1337	15.275	1.586	1.4525
U1337	15.279	1.39	1.42275
588	15.2858	1.67	1.399
U1337	15.286	1.1	1.412
U1337	15.29	1.11	1.41
U1337	15.294	1.48	1.40875
U1337	15.298	1.53	1.39625
U1337	15.302	1.43	1.43
588	15.3058	1.57	1.47125
U1337	15.306	1.38	1.49625
588	15.3086	1.57	1.45875
U1337	15.309	1.37	1.4125
U1337	15.313	1.44	1.38125
U1337	15.317	1.68	1.38375
U1337	15.321	1.23	1.4075
U1337	15.325	1.06	1.4475
588	15.3266	1.32	1.43
U1337	15.332	1.4	1.37875
U1337	15.336	1.76	1.39875
U1337	15.339	1.69	1.41875
U1337	15.343	1.3	1.46125
U1337	15.346	1.27	1.4625
588	15.346	1.39	1.3825
U1337	15.35	1.22	1.365
U1337	15.353	1.66	1.41375
U1337	15.357	1.41	1.39375
U1337	15.36	1.12	1.42375
U1337	15.364	1.55	1.47875
588	15.3648	1.69	1.46625
U1337	15.367	1.11	1.48
U1337	15.371	1.63	1.52625
U1337	15.374	1.66	1.5525
U1337	15.378	1.56	1.5075
U1337	15.381	1.52	1.5175
U1337	15.385	1.49	1.45875
588	15.3862	1.76	1.39
U1337	15.388	1.33	1.325
U1337	15.392	1.19	1.28875
U1337	15.395	1.16	1.29375
U1337	15.399	1.11	1.2575
U1337	15.402	1.04	1.2825
U1337	15.405	1.23	1.29375
588	15.4062	1.53	1.3365
U1337	15.408	1.47	1.39225
588	15.4089	1.53	1.45362
U1337	15.411	1.28	1.45988
U1337	15.412	1.502	1.499
U1337	15.415	1.556	1.54913
U1337	15.418	1.531	1.59338
588	15.4243	1.28	1.6515
U1337	15.433	1.843	1.6895
U1337	15.436	1.871	1.73
U1337	15.439	1.884	1.74163
U1337	15.442	1.745	1.74138
U1337	15.445	1.806	1.69575
588	15.4464	1.88	1.6155
U1337	15.448	1.624	1.52862
U1337	15.451	1.278	1.44275
U1337	15.454	1.478	1.37387
U1337	15.457	1.229	1.35388
U1337	15.46	1.189	1.38538
U1337	15.462	1.058	1.41575
U1337	15.465	1.255	1.39237
588	15.465	1.72	1.38712
U1337	15.468	1.876	1.38912
U1337	15.471	1.521	1.40225
U1337	15.474	1.291	1.44288
U1337	15.477	1.187	1.3535
U1337	15.481	1.205	1.23925
U1337	15.485	1.163	1.26225
588	15.4865	1.58	1.29287
U1337	15.489	1.005	1.3535
U1337	15.493	0.962	1.40163
U1337	15.496	1.705	1.455
U1337	15.501	1.536	1.44637
U1337	15.506	1.672	1.48287
588	15.5065	1.59	1.59013
588	15.5092	1.59	1.55812
U1337	15.51	1.511	1.60363
U1337	15.514	1.297	1.57825
588	15.5166	1.82	1.57175
U1337	15.518	1.449	1.56825
588	15.5199	1.9	1.578
U1337	15.522	1.469	1.63712
U1337	15.526	1.538	1.617
U1337	15.53	1.562	1.6345
U1337	15.535	1.589	1.58363
588	15.538	1.77	1.59863
U1337	15.539	1.659	1.636
U1337	15.543	1.589	1.624
U1337	15.547	1.493	1.67538
U1337	15.549	1.589	1.60225
U1337	15.553	1.837	1.47625
U1337	15.557	1.466	1.3455
588	15.5607	2	1.25587
U1337	15.562	1.185	1.20762
U1337	15.566	0.651	1.06075
U1337	15.57	0.543	1.1125
U1337	15.572	0.776	0.931375
U1337	15.575	1.203	0.853125
U1337	15.578	0.662	0.885375
588	15.5802	1.88	0.9195
U1337	15.581	0.551	0.87075
U1337	15.584	0.559	0.78475
U1337	15.587	0.909	0.797
U1337	15.59	0.816	0.8195
U1337	15.593	0.386	0.811875
U1337	15.597	0.515	0.87575
U1337	15.598	0.76	0.938375
588	15.5988	2.06	1.05263
U1337	15.603	0.49	1.26438
U1337	15.608	1.07	1.41
U1337	15.613	1.41	1.53
U1337	15.617	1.73	1.485
588	15.6203	2.08	1.645
U1337	15.622	1.68	1.70375
U1337	15.627	1.72	1.74625
U1337	15.632	1.7	1.73875
U1337	15.637	1.77	1.6975
588	15.6403	1.54	1.7075
U1337	15.642	1.75	1.7075
588	15.643	1.67	1.68875
U1337	15.647	1.75	1.675
U1337	15.652	1.76	1.65375
U1337	15.657	1.72	1.60625
588	15.6604	1.55	1.585
U1337	15.661	1.66	1.605
U1337	15.666	1.37	1.58875
U1337	15.671	1.37	1.58625
U1337	15.676	1.5	1.545
588	15.6798	1.91	1.51125
U1337	15.681	1.63	1.51375
U1337	15.686	1.7	1.5825
U1337	15.691	1.22	1.54
U1337	15.696	1.39	1.435
U1337	15.7	1.39	1.4125
588	15.7025	1.92	1.3525
U1337	15.705	1.16	1.415
U1337	15.71	1.07	1.4075
U1337	15.715	1.45	1.45125
U1337	15.72	1.22	1.41625
588	15.7206	1.72	1.42375
U1337	15.726	1.33	1.4425
U1337	15.733	1.74	1.45
U1337	15.74	1.64	1.495
588	15.7407	1.22	1.5
588	15.7434	1.22	1.5825
U1337	15.747	1.51	1.5675
U1337	15.753	1.58	1.5525
U1337	15.76	1.76	1.58125
588	15.7607	1.99	1.68125
U1337	15.767	1.62	1.68625
U1337	15.773	1.52	1.67125
U1337	15.78	1.45	1.7
588	15.7808	2.02	1.62375
U1337	15.787	1.55	1.6075
U1337	15.794	1.46	1.62375
588	15.7989	1.99	1.66125
U1337	15.8	1.38	1.62125
U1337	15.804	1.49	1.615
U1337	15.808	1.65	1.64
U1337	15.812	1.75	1.5725
U1337	15.816	1.7	1.56625
U1337	15.82	1.5	1.58625
588	15.821	1.66	1.58875
U1337	15.824	1.45	1.58
U1337	15.828	1.33	1.5725
U1337	15.832	1.65	1.6075
U1337	15.836	1.67	1.6175
U1337	15.84	1.68	1.65
588	15.841	1.64	1.69125
588	15.8437	1.78	1.75875
U1337	15.844	1.74	1.75863
U1337	15.848	1.71	1.78362
U1337	15.852	1.66	1.76238
588	15.8551	2.19	1.7215
U1337	15.856	1.669	1.67825
588	15.8577	1.88	1.64562
U1337	15.86	1.47	1.67188
U1337	15.864	1.453	1.59063
U1337	15.868	1.394	1.61575
U1337	15.872	1.449	1.58413
588	15.8744	1.87	1.55063
U1337	15.876	1.54	1.53188
588	15.8772	1.87	1.4825
U1337	15.88	1.627	1.5235
U1337	15.884	1.202	1.4755
U1337	15.888	1.303	1.563
U1337	15.893	0.999	1.5605
U1337	15.899	1.777	1.51725
U1337	15.903	1.486	1.5845
1090	15.9039	2.24	1.64463
U1337	15.908	1.85	1.69225
U1337	15.913	1.281	1.77512
588	15.9146	1.74	1.82187
U1337	15.919	1.784	1.76937
U1337	15.922	1.38	1.745
1090	15.9223	2.44	1.79012
U1337	15.928	1.86	1.75887
588	15.9313	1.82	1.73762
U1337	15.933	1.655	1.85888
U1337	15.94	1.642	1.74963
U1337	15.944	1.49	1.74213
U1337	15.949	1.614	1.69338
1090	15.953	2.35	1.77775
U1337	15.954	1.566	1.76537
588	15.9548	1.8	1.75075
U1337	15.959	1.43	1.8315
1090	15.9625	2.33	1.78025
U1337	15.964	1.543	1.76287
U1337	15.97	1.373	1.66437
1090	15.9721	2.26	1.77312
588	15.9731	1.94	1.59775
U1337	15.974	1.427	1.62613
U1337	15.98	1.012	1.59437
1090	15.9825	2.3	1.54062
U1337	15.985	0.927	1.386
588	15.9855	1.77	1.29912
U1337	15.99	1.119	1.259
588	15.9935	1.83	1.18775
U1337	15.996	0.703	1.38813
U1337	16.006	0.732	1.274
U1337	16.011	0.691	1.33825
588	16.0112	1.73	1.31912
1090	16.0144	2.53	1.4725
U1337	16.017	0.857	1.55075
U1337	16.023	1.633	1.6275
U1337	16.028	1.677	1.57962
588	16.0296	1.93	1.51837
U1337	16.034	1.358	1.55675
U1337	16.039	1.305	1.58512
U1337	16.045	1.347	1.6355
1090	16.0463	2.04	1.568
U1337	16.049	1.164	1.617
588	16.05	1.86	1.70762
1090	16.0518	2.08	1.71975
U1337	16.054	1.39	1.71725
588	16.0554	1.75	1.74087
1090	16.0571	2.03	1.77962
U1337	16.059	1.444	1.76963
1090	16.0626	2.02	1.75812
U1337	16.065	1.353	1.80062
1090	16.0681	2.17	1.86062
588	16.0717	2	1.82812
U1337	16.073	1.298	1.74475
1090	16.0736	2.09	1.83937
1090	16.079	2.51	1.78687
U1337	16.079	1.184	1.80438
U1337	16.084	1.353	1.81913
1090	16.0844	2.11	1.73463
588	16.0875	1.75	1.70088
1090	16.0899	2.14	1.736
U1337	16.09	1.416	1.87312
U1337	16.095	1.414	1.73562
1090	16.0953	2.24	1.83187
U1337	16.1	1.465	1.706
1090	16.1062	2.45	1.7615
U1337	16.107	1.01	1.8385
1090	16.1106	2.52	1.69662
U1337	16.112	1.133	1.67912
588	16.1166	1.86	1.55113
1090	16.1171	2.03	1.61312
U1337	16.118	1.105	1.60562
U1337	16.124	1.325	1.6365
U1337	16.129	1.426	1.65525
U1337	16.135	1.506	1.56163
1090	16.1389	2.46	1.711
U1337	16.147	1.38	1.7035
1090	16.1477	2.01	1.67288
U1337	16.152	1.281	1.74837
1090	16.1564	2.3	1.552
U1337	16.159	1.265	1.647
U1337	16.164	1.181	1.534
1090	16.1652	2.11	1.49737
U1337	16.172	0.889	1.47987
1090	16.1739	2.14	1.52925
U1337	16.176	1.106	1.56362
U1337	16.179	0.988	1.55612
1090	16.1826	2.16	1.72125
588	16.1835	1.66	1.61325
U1337	16.186	1.456	1.64263
588	16.1865	2.05	1.79537
1090	16.1914	2.21	1.6885
U1337	16.192	1.276	1.68225
U1337	16.195	1.341	1.65275
1090	16.2001	2.21	1.551
U1337	16.203	1.305	1.536
588	16.2032	1.61	1.52225
U1337	16.208	1.22	1.55462
U1337	16.214	1.236	1.42937
1090	16.2176	2.09	1.52875
U1337	16.22	1.166	1.488
588	16.2243	1.6	1.49962
U1337	16.225	1.208	1.61013
1090	16.2264	2.1	1.48638
U1337	16.231	1.284	1.57312
U1337	16.236	1.313	1.56437
1090	16.2369	2.12	1.59962
U1337	16.242	1.1	1.48975
588	16.2427	1.86	1.613
1090	16.2439	1.53	1.59237
588	16.2477	1.49	1.47788
U1337	16.248	1.221	1.54538
1090	16.2526	2.27	1.51662
U1337	16.253	1.148	1.49775
U1337	16.259	1.204	1.51912
1090	16.2614	1.64	1.5865
588	16.2637	1.63	1.46775
U1337	16.265	1.379	1.558
U1337	16.27	1.661	1.59025
1090	16.2701	1.76	1.594
U1337	16.276	1.32	1.56475
1090	16.2786	1.87	1.62862
U1337	16.281	1.462	1.59213
588	16.2818	1.67	1.59963
U1337	16.287	1.396	1.59462
1090	16.2871	1.89	1.55462
U1337	16.293	1.369	1.56587
1090	16.2957	1.82	1.56462
U1337	16.298	1.28	1.55425
588	16.301	1.55	1.53425
U1337	16.304	1.552	1.556
1090	16.3043	1.66	1.51975
U1337	16.31	1.313	1.5685
1090	16.313	1.73	1.5445
U1337	16.315	1.543	1.61175
588	16.3168	1.53	1.583
588	16.3206	1.67	1.66137
U1337	16.321	1.358	1.61888
1090	16.3217	2.09	1.559
U1337	16.326	1.43	1.48075
1090	16.3304	1.94	1.5695
U1337	16.332	1.39	1.6235
U1337	16.338	1.064	1.49525
U1337	16.339	0.904	1.559
1090	16.3391	2.38	1.45175
588	16.3404	1.79	1.5555
U1337	16.344	1.064	1.54725
1090	16.3478	1.94	1.66925
U1337	16.351	1.082	1.61925
1090	16.3565	2.22	1.50363
U1337	16.359	0.998	1.58813
588	16.3613	1.88	1.52087
1090	16.3652	1.98	1.57187
U1337	16.366	0.865	1.51938
1090	16.374	1.74	1.582
U1337	16.374	1.402	1.62825
588	16.3777	1.49	1.53025
588	16.3796	1.8	1.64337
U1337	16.381	1.499	1.56638
1090	16.3827	2.25	1.62613
U1337	16.39	1.196	1.5975
1090	16.3914	1.77	1.64375
U1337	16.396	1.124	1.582
1090	16.4001	1.88	1.5395
U1337	16.404	1.261	1.53638
1090	16.4088	2.17	1.52137
U1337	16.412	1.005	1.53837
1090	16.4175	1.91	1.44912
U1337	16.419	1.171	1.42575
1090	16.4262	1.65	1.3895
U1337	16.427	1.26	1.45888
U1337	16.434	1.166	1.31838
U1337	16.442	1.074	1.36825
1090	16.4462	1.88	1.24387
588	16.4473	1.56	1.2095
U1337	16.449	0.786	1.3725
1090	16.4553	1.57	1.39138
U1337	16.456	0.655	1.41388
U1337	16.461	0.985	1.35963
1090	16.4626	2.47	1.41012
U1337	16.469	1.225	1.44263
1090	16.4717	2.06	1.52262
U1337	16.474	1.126	1.6645
U1337	16.48	1.19	1.50863
1090	16.4807	1.83	1.49537
U1337	16.486	1.295	1.49038
1090	16.4898	2.12	1.4805
U1337	16.492	1.223	1.59925
U1337	16.498	1.119	1.54925
1090	16.4987	2.02	1.516
U1337	16.502	1.047	1.3755
1090	16.5078	2.14	1.51638
588	16.5081	1.43	1.52438
U1337	16.509	1.029	1.55437
U1337	16.514	0.996	1.57525
1090	16.5168	2.35	1.46812
U1337	16.518	1.183	1.58312
1090	16.5259	2.26	1.56837
U1337	16.526	1.214	1.57412
U1337	16.531	1.283	1.54912
1090	16.5349	2.35	1.53137
U1337	16.537	0.911	1.37062
U1337	16.543	1.042	1.38163
1090	16.5439	2.15	1.48625
U1337	16.548	1.041	1.369
U1337	16.556	0.974	1.43588
U1337	16.562	1.302	1.46437
1090	16.5621	2.12	1.32575
U1337	16.566	1.412	1.43937
U1337	16.573	1.446	1.45525
588	16.5774	1.27	1.446
U1337	16.579	1.041	1.316
1090	16.5802	1.95	1.26337
U1337	16.585	1.101	1.212
U1337	16.59	1.228	1.2045
U1337	16.596	1.08	1.26075
U1337	16.602	0.991	1.20837
U1337	16.607	1.035	1.3695
U1337	16.613	1.21	1.41012
U1337	16.62	1.491	1.50013
U1337	16.625	1.531	1.56563
1090	16.6254	2.39	1.6075
U1337	16.631	1.553	1.638
1090	16.6345	1.8	1.69037
U1337	16.635	1.515	1.63588
588	16.6383	1.37	1.59337
U1337	16.642	1.454	1.52762
1090	16.6435	1.91	1.4315
U1337	16.648	1.095	1.54712
1090	16.6526	2.05	1.54425
U1337	16.654	1.027	1.53425
U1337	16.66	1.031	1.578
1090	16.6617	2.44	1.64863
U1337	16.665	1.347	1.5545
U1337	16.67	1.374	1.56638
1090	16.6707	2.26	1.63013
588	16.6712	1.66	1.59388
U1337	16.677	1.297	1.6175
U1337	16.683	1.122	1.62812
U1337	16.686	1.541	1.5155
1090	16.6889	2.15	1.60675
U1337	16.692	1.536	1.59187
U1337	16.698	1.459	1.59587
U1337	16.704	1.359	1.612
1090	16.707	2.39	1.50388
U1337	16.709	1.178	1.56438
U1337	16.715	1.154	1.51687
1090	16.7161	1.67	1.47513
U1337	16.721	1.285	1.39763
1090	16.7246	2.02	1.37925
U1337	16.727	1.079	1.475
U1337	16.731	1.025	1.41662
1090	16.7328	1.77	1.52475
U1337	16.737	1.031	1.44425
1090	16.7408	1.92	1.48825
U1337	16.744	1.203	1.52638
1090	16.7489	2.15	1.57763
U1337	16.75	1.376	1.59162
U1337	16.755	1.431	1.64663
588	16.7556	1.33	1.62713
1090	16.7569	2.18	1.52263
U1337	16.761	1.143	1.63313
1090	16.765	2.36	1.59462
U1337	16.767	1.047	1.54912
U1337	16.772	1.314	1.46225
1090	16.7731	2.26	1.48125
U1337	16.784	1.123	1.27925
U1337	16.791	0.966	1.34213
U1337	16.795	1.485	1.31488
U1337	16.8	1.295	1.20213
U1337	16.807	0.744	1.20525
588	16.8098	1.55	1.24188
U1337	16.813	1.096	1.20887
U1337	16.821	1.358	1.20425
U1337	16.826	1.148	1.27513
U1337	16.831	1.259	1.19362
U1337	16.837	1.221	1.33913
U1337	16.844	1.258	1.33263
U1337	16.85	1.311	1.50287
U1337	16.855	0.898	1.5015
1090	16.8619	2.26	1.51887
U1337	16.863	1.306	1.67912
1090	16.8669	2.51	1.64813
U1337	16.87	1.248	1.85213
588	16.8717	1.36	1.69725
1090	16.8719	2.54	1.829
U1337	16.875	1.063	1.63987
1090	16.8771	2.53	1.75762
U1337	16.881	1.021	1.87387
1090	16.8821	2.36	1.66475
U1337	16.887	0.997	1.83812
1090	16.8871	2.19	1.67
1090	16.8922	2.29	1.84238
U1337	16.894	0.867	1.69638
1090	16.8972	2.45	1.868
U1337	16.9	1.185	1.75813
1090	16.9023	2.4	1.78063
U1337	16.905	1.192	1.83775
1090	16.9073	2.37	1.82025
U1337	16.911	1.311	1.96963
1090	16.9124	2.47	1.80512
U1337	16.916	1.324	1.81612
1090	16.9175	2.31	1.82863
1090	16.9225	2.38	1.85388
U1337	16.923	1.084	1.82138
588	16.9259	1.28	1.856
1090	16.9275	2.47	1.81475
U1337	16.928	1.513	1.81975
1090	16.9326	2.21	1.87462
U1337	16.934	1.601	2.03212
588	16.9362	1.98	1.935
1090	16.9376	2.42	2.01588
U1337	16.939	1.523	1.93037
1090	16.9427	2.54	2.004
U1337	16.944	1.693	2.08275
1090	16.9478	2.16	1.99225
U1337	16.952	1.526	2.11687
1090	16.9528	2.19	2.04287
1090	16.9579	2.61	2.14
U1337	16.958	1.696	2.1025
1090	16.9629	2.52	2.2055
U1337	16.964	1.948	2.14688
1090	16.968	2.47	2.09187
U1337	16.97	1.86	2.10475
1090	16.9731	2.35	2.05475
U1337	16.975	1.721	2.04375
1090	16.9781	2.17	1.93837
U1337	16.98	1.799	1.99838
1090	16.9831	2.12	2.00963
588	16.9878	1.86	1.99725
U1337	16.988	1.627	2.01725
1090	16.9887	2.34	1.99338
1090	16.9943	2.44	2.05337
U1337	16.995	1.622	2.02088
1090	16.9999	2.33	2.11875
U1337	17	1.608	2.02763
1090	17.0055	2.6	2.03262
U1337	17.006	1.6	2.04013
1090	17.0111	2.41	2.04388
U1337	17.012	1.611	2.04625
1090	17.0167	2.48	2.015
U1337	17.018	1.682	2.01662
1090	17.0223	2.36	2.02287
U1337	17.024	1.627	2.01362
1090	17.0279	2.35	1.97362
U1337	17.03	1.613	1.99337
1090	17.0335	2.46	1.92375
U1337	17.036	1.537	2.00788
1090	17.0391	2.16	1.90425
588	17.042	1.84	1.99888
U1337	17.043	1.803	1.87263
1090	17.0447	2.3	1.95675
U1337	17.047	1.521	1.89725
1090	17.0503	2.37	1.9735
U1337	17.054	1.45	1.95487
1090	17.0559	2.21	1.96737
U1337	17.059	1.684	2.01
1090	17.0615	2.45	2.02
U1337	17.066	1.654	2.02275
1090	17.0671	2.4	2.06775
U1337	17.072	1.862	2.14725
1090	17.0727	2.45	2.02175
U1337	17.078	1.472	1.9785
1090	17.0783	2.57	2.00225
1090	17.0839	2.32	1.87487
U1337	17.084	1.446	1.7775
U1337	17.09	1.308	1.92725
1090	17.095	2.59	1.816
U1337	17.095	0.843	1.69737
U1337	17.1	1.671	1.83913
1090	17.1006	2.67	1.82275
588	17.1038	1.68	1.799
U1337	17.105	1.371	1.90537
1090	17.1062	2.58	1.98775
U1337	17.11	1.177	1.84438
1090	17.1118	2.4	1.94938
U1337	17.115	1.694	1.97162
1090	17.1174	2.33	1.94537
U1337	17.12	1.523	2.02262
1090	17.123	2.52	2.02513
U1337	17.126	1.549	2.03887
1090	17.1286	2.37	2.05388
U1337	17.13	1.795	2.05563
1090	17.1342	2.42	1.92413
U1337	17.135	1.804	2.023
1090	17.1398	2.45	1.93487
U1337	17.141	1.537	1.968
U1337	17.145	1.468	1.8915
1090	17.1454	2.34	1.9635
U1337	17.15	1.665	1.8885
1090	17.151	2.06	1.902
U1337	17.155	1.808	2.02475
1090	17.1565	2.38	1.93712
588	17.158	1.85	2.0565
U1337	17.16	1.645	1.9925
1090	17.1621	2.45	2.07025
U1337	17.165	1.639	1.96613
1090	17.1677	2.62	1.94725
U1337	17.17	1.548	2.05038
1090	17.1733	2.43	2.06038
U1337	17.175	1.547	2.0265
U1337	17.178	1.699	1.856
1090	17.1789	2.47	2.035
1090	17.1845	2.53	1.95913
U1337	17.185	1.368	2.09825
U1337	17.189	1.256	2.13838
1090	17.1901	2.98	2.004
U1337	17.194	1.823	2.01775
1090	17.1952	2.66	2.0505
588	17.1959	2.02	2.22725
U1337	17.199	1.395	2.04475
1090	17.2002	2.64	2.02812
U1337	17.201	1.63	2.01187
1090	17.2052	2.67	1.98937
U1337	17.206	1.52	2.13125
U1337	17.21	1.69	2.02375
1090	17.2104	2.53	2.15
U1337	17.215	1.84	2.0425
1090	17.2154	2.53	2.18
U1337	17.22	1.78	2.18375
1090	17.2204	2.64	2.18625
U1337	17.225	1.81	2.17625
1090	17.2255	2.62	2.15375
U1337	17.23	1.72	2.1375
1090	17.2305	2.55	2.18875
U1337	17.234	1.76	2.16
1090	17.2355	2.35	2.105
U1337	17.239	1.65	2.09375
1090	17.2403	3.05	2.09125
U1337	17.244	1.58	2.08125
1090	17.2451	2.18	2.0825
U1337	17.249	1.63	2.0725
1090	17.2499	2.53	1.96
U1337	17.253	1.68	1.955
1090	17.2547	2.36	1.98375
U1337	17.258	1.57	1.97125
1090	17.2594	2.15	1.97125
U1337	17.263	1.54	1.9675
1090	17.2642	2.41	1.9775
U1337	17.268	1.53	1.97375
1090	17.2689	2.53	1.9725
U1337	17.272	1.65	1.95375
1090	17.2737	2.44	1.94375
U1337	17.277	1.54	1.9175
1090	17.2785	2.14	1.835
U1337	17.282	1.39	1.76625
1090	17.2832	2.33	1.73125
U1337	17.287	1.32	1.665
1090	17.2881	1.87	1.6575
U1337	17.291	1.1	1.60625
1090	17.2928	2.16	1.6725
U1337	17.296	1.01	1.67875
1090	17.2976	2.08	1.6875
U1337	17.301	0.98	1.8575
1090	17.3024	2.86	1.8175
U1337	17.306	1.37	2.0025
U1337	17.31	1.94	1.94375
1090	17.3112	2.46	2.03125
U1337	17.315	1.84	1.905
1090	17.3199	2.49	1.97125
U1337	17.32	1.61	1.9575
U1337	17.324	1.68	1.86625
U1337	17.329	1.85	1.83125
588	17.3305	1.9	1.85125
U1337	17.334	1.83	1.86125
U1337	17.338	1.73	1.87875
U1337	17.343	1.56	1.9825
1090	17.3463	2.65	1.98
U1337	17.348	1.69	1.98625
U1337	17.352	1.82	2.08375
1090	17.3551	2.68	2.11375
U1337	17.357	1.88	2.02
U1337	17.362	1.88	2.12125
1090	17.3638	2.51	2.1025
U1337	17.366	1.8	1.94875
U1337	17.371	1.9	1.98375
1090	17.3726	2.5	1.93
U1337	17.376	1.67	1.8075
U1337	17.38	1.45	1.84875
1090	17.3814	2.16	1.83125
U1337	17.385	1.45	1.79625
U1337	17.39	1.53	1.75625
1090	17.3902	2.13	1.7325
U1337	17.394	1.76	1.63875
1090	17.396	2.22	1.655
U1337	17.399	1.35	1.65212
U1337	17.404	1.26	1.73838
U1337	17.408	1.41	1.74313
U1337	17.413	1.58	1.74562
U1337	17.417	1.507	1.81275
1090	17.4193	2.82	1.84725
U1337	17.422	1.798	1.98475
1090	17.4251	2.24	1.972
U1337	17.426	1.887	2.11613
U1337	17.43	1.536	1.99538
1090	17.4308	2.51	2.08188
U1337	17.436	1.478	1.99675
1090	17.4365	2.66	2.07963
U1337	17.441	1.854	2.052
1090	17.4424	2.49	1.98075
U1337	17.445	1.559	2.0835
1090	17.4481	2.55	1.9185
U1337	17.45	1.315	1.84013
588	17.4516	1.94	1.83512
1090	17.4538	2.3	1.83038
U1337	17.455	1.34	1.72425
U1337	17.458	1.227	1.86113
1090	17.4596	2.45	1.7965
U1337	17.461	1.521	1.77775
U1337	17.465	1.701	1.84238
1090	17.4654	2.41	1.92625
U1337	17.47	1.423	1.90625
1090	17.4711	2.15	1.92387
U1337	17.473	1.857	1.9825
U1337	17.475	1.898	1.975
1090	17.4753	2.29	2.01262
U1337	17.479	1.662	2.00137
1090	17.479	2.17	1.94738
1090	17.4827	2.35	1.95138
U1337	17.483	1.724	1.85925
1090	17.485	2.06	1.91525
U1337	17.488	1.425	1.82313
1090	17.4902	1.93	1.76937
U1337	17.492	1.553	1.73475
1090	17.494	2.11	1.82975
U1337	17.495	1.433	1.798
1090	17.4977	1.92	1.898
U1337	17.499	1.447	1.90638
1090	17.5015	2.82	1.86062
U1337	17.503	1.171	1.88187
1090	17.5037	2.73	1.81812
1090	17.5045	1.62	1.9185
U1337	17.507	1.744	1.74175
U1337	17.511	1.603	1.80313
U1337	17.514	1.41	1.63363
1090	17.5173	2.25	1.61375
U1337	17.518	1.406	1.71325
U1337	17.522	1.662	1.672
U1337	17.525	1.374	1.72825
U1337	17.529	1.461	1.64138
1090	17.5301	2.54	1.6765
U1337	17.533	1.273	1.77
588	17.5352	1.86	1.797
U1337	17.537	1.555	1.82937
U1337	17.54	1.687	1.68588
1090	17.5428	2.41	1.7035
U1337	17.544	1.59	1.80225
U1337	17.548	1.72	1.77625
U1337	17.551	1.392	1.75737
U1337	17.555	1.414	1.64612
1090	17.5555	2.65	1.589
U1337	17.559	1.347	1.604
U1337	17.563	1.536	1.57525
U1337	17.566	1.52	1.6685
U1337	17.57	1.133	1.4935
1090	17.5708	1.84	1.48675
U1337	17.574	1.162	1.57725
1090	17.5763	2.16	1.529
U1337	17.578	1.25	1.61488
U1337	17.581	1.293	1.72237
1090	17.5833	2.26	1.75375
U1337	17.585	1.134	1.71
588	17.5861	1.82	1.83625
1090	17.5902	2.7	1.91863
U1337	17.591	1.413	1.94613
U1337	17.596	1.81	2.007
1090	17.5971	2.26	1.9895
U1337	17.602	1.952	1.92825
1090	17.6041	2.48	1.94538
U1337	17.608	1.621	2.08663
U1337	17.608	1.68	1.96538
1090	17.611	2.21	1.99763
U1337	17.614	1.55	1.85888
1090	17.6179	2.94	1.91875
U1337	17.62	1.29	1.91375
1090	17.6249	2.21	1.95
U1337	17.626	1.37	1.9625
926/929	17.6291	2.1	1.91125
U1337	17.631	1.64	1.93125
1090	17.6318	2.5	1.955
U1337	17.637	1.65	1.985
1090	17.6402	2.53	2.00625
U1337	17.643	1.45	1.97375
926/929	17.6438	2.4	1.94625
588	17.6442	1.61	1.9125
1090	17.6457	2.27	1.9225
U1337	17.648	1.38	2.04
1090	17.6526	2.28	1.87625
U1337	17.654	1.38	1.98375
926/929	17.6584	2.61	2.01875
1090	17.6596	2.39	2.12625
U1337	17.66	1.09	1.97875
926/929	17.6637	2.47	2.08
1090	17.6665	2.55	2.03
926/929	17.6668	2.24	1.985
U1337	17.668	1.1	2.13
926/929	17.6699	2.19	2.02375
926/929	17.6729	2.21	1.9975
1090	17.6735	2.03	2.08125
926/929	17.676	2.25	2.2125
U1337	17.676	1.62	2.10625
926/929	17.6791	2.34	2.095
1090	17.6798	2.91	2.17125
926/929	17.6821	2.15	2.135
U1337	17.685	1.34	2.23
926/929	17.6852	2.12	2.10875
1090	17.6863	2.64	2.00625
588	17.6879	1.96	1.98875
1090	17.6927	2.38	2.095
U1337	17.694	1.37	2.13375
926/929	17.6944	2.09	1.97375
588	17.6951	2.01	1.99
926/929	17.6975	2.19	1.99375
1090	17.6991	2.43	2.07125
U1337	17.702	1.36	2.08
926/929	17.7036	2.09	2.03375
1090	17.7055	2.41	2.065
926/929	17.7067	1.99	1.97875
926/929	17.7096	2.16	2.085
U1337	17.711	1.64	2.0375
1090	17.712	2.44	2.00625
926/929	17.7158	1.74	2.04875
1090	17.7183	2.21	2.0775
U1337	17.719	1.71	2.095
926/929	17.721	2.16	2.08
1090	17.7234	2.33	2.175
926/929	17.7258	2.39	2.1775
U1337	17.728	1.78	2.24
926/929	17.7282	2.32	2.3075
1090	17.7285	2.5	2.29625
926/929	17.7306	2.23	2.21375
926/929	17.7329	2.21	2.28375
1090	17.7337	2.7	2.33125
926/929	17.7352	2.24	2.27125
U1337	17.736	1.73	2.24625
926/929	17.7376	2.34	2.14875
1090	17.7388	2.7	2.12375
926/929	17.74	2.02	2.09
926/929	17.7421	2.03	2.1325
U1337	17.743	1.43	2.11875
1090	17.7435	2.5	2.03375
926/929	17.7443	1.97	2.0425
926/929	17.7464	2.07	1.9575
1090	17.748	2.23	2.05125
926/929	17.7486	2.02	2.09375
926/929	17.7507	2.09	2.15625
U1337	17.751	1.35	2.195
926/929	17.7528	2.18	2.22
1090	17.753	2.84	2.145
926/929	17.7549	2.47	2.1825
926/929	17.7571	2.38	2.33875
1090	17.7579	2.43	2.35875
U1337	17.759	1.42	2.2775
926/929	17.7595	2.39	2.1625
1090	17.7628	2.6	2.16625
926/929	17.763	2.34	2.095
926/929	17.7665	2.19	2.245
U1337	17.767	1.55	2.2025
1090	17.7677	2.41	2.0875
926/929	17.77	1.86	2.085
1090	17.7726	2.62	2.105
926/929	17.7735	2.05	2.1975
U1337	17.775	1.68	2.06625
926/929	17.7771	2.32	2.1475
1090	17.7775	2.35	2.07
926/929	17.7806	2.29	2.09625
U1337	17.782	1.36	2.12625
1090	17.7825	2.51	2.02625
926/929	17.7841	2	1.97625
1090	17.7874	2.26	2.00875
926/929	17.7876	1.92	2.1025
U1337	17.79	1.52	2.0075
588	17.7921	1.95	1.93875
1090	17.7923	2.55	1.9
1090	17.7972	2.11	1.93875
926/929	17.7975	1.75	1.99625
U1337	17.798	1.45	1.8975
926/929	17.8	1.95	1.83875
1090	17.8021	2.23	1.875
926/929	17.8051	1.98	1.92
U1337	17.806	1.16	2.055
1090	17.807	2.08	2.12
926/929	17.8077	2.4	2.13875
1090	17.8102	2.11	2.07
926/929	17.8103	2.53	2.215
926/929	17.8128	2.47	2.2275
1090	17.8134	2.38	2.21125
U1337	17.814	1.43	2.23375
926/929	17.8154	2.32	2.195
1090	17.8166	2.18	2.09625
926/929	17.818	2.27	2.08625
1090	17.8197	2.29	2.1875
926/929	17.8205	2.22	2.20125
U1337	17.822	1.68	2.20875
1090	17.8228	2.3	2.1875
926/929	17.8231	2.24	2.08625
926/929	17.8256	2.43	2.12375
1090	17.826	2.24	2.1675
926/929	17.8282	2.1	2.14375
U1337	17.829	1.48	2.1175
1090	17.8292	2.52	2.12625
926/929	17.8307	2.03	2.09
1090	17.8324	2.11	2.01875
926/929	17.8332	2.03	2.06875
1090	17.8355	2.5	2.0625
926/929	17.8358	1.95	2.05375
U1337	17.837	1.53	2.11125
926/929	17.8384	1.88	2.13875
1090	17.8386	2.47	2.12
926/929	17.8409	1.96	2.06
1090	17.8418	2.57	2.155
926/929	17.8435	2.25	2.24625
1090	17.845	2.35	2.2275
U1337	17.845	1.47	2.2375
926/929	17.8461	2.29	2.19125
1090	17.8482	2.61	2.08875
926/929	17.8487	2.32	2.02875
926/929	17.8517	2.04	2.1375
1090	17.8525	2.2	2.07875
U1337	17.853	1.43	1.96625
926/929	17.8547	1.87	1.85
1090	17.8569	2.34	1.8825
926/929	17.8576	1.82	1.89875
926/929	17.8606	1.71	2.0275
U1337	17.861	1.39	2.04875
1090	17.8613	2.3	1.95125
926/929	17.8636	2.33	1.95875
1090	17.8657	2.46	2.02875
926/929	17.8666	2.04	2.07875
U1337	17.868	1.56	2.03
926/929	17.8696	1.88	2.0225
1090	17.8701	2.27	1.98625
588	17.8718	1.79	1.94625
926/929	17.8725	1.91	1.975
1090	17.8727	2.27	1.995
1090	17.8745	2.17	2.03625
926/929	17.8756	1.72	2.09
U1337	17.876	1.79	2.18125
926/929	17.8785	2.04	2.1475
1090	17.8798	2.6	2.17875
926/929	17.8815	2.22	2.245
1090	17.8824	2.64	2.3175
U1337	17.884	2	2.27125
1090	17.8842	2.42	2.18625
926/929	17.8846	2.25	2.2075
1090	17.8877	2.37	2.12625
926/929	17.8877	1.67	2.16125
U1337	17.891	1.92	2.1175
1090	17.8921	2.39	2.0775
926/929	17.8939	1.99	2.02625
1090	17.8964	2.28	2.0375
U1337	17.897	2.07	2.01
926/929	17.8971	1.93	1.9
926/929	17.9002	1.96	1.915
588	17.9003	1.76	1.875
926/929	17.9033	1.7	1.89
U1337	17.904	1.51	1.84
1090	17.9061	2.11	1.8625
926/929	17.9065	1.96	1.9
1090	17.9105	2.19	1.96125
U1337	17.911	1.53	1.98625
926/929	17.9127	2.14	1.99625
1090	17.914	2.06	2.01375
926/929	17.9159	2.19	1.975
U1337	17.917	1.71	2.06875
1090	17.9184	2.19	2.02
926/929	17.9195	2.1	1.9975
926/929	17.9218	1.88	1.96625
1090	17.9237	2.28	2.035
U1337	17.924	1.75	2.0775
926/929	17.9258	1.88	2.04625
588	17.9277	1.94	2.0075
926/929	17.9278	2.26	2.00375
1090	17.928	2.53	2.0675
926/929	17.9297	1.85	2.1275
U1337	17.931	1.57	2.095
926/929	17.9317	2.25	2.04625
1090	17.9325	2.26	2.0725
1090	17.9368	2.36	2.09625
U1337	17.937	1.68	2.21375
926/929	17.9395	1.87	2.1225
1090	17.9398	2.74	2.12625
926/929	17.9434	2.04	2.12125
1090	17.9436	2.51	2.11625
U1337	17.944	1.52	2.1575
926/929	17.9473	2.29	2.1525
1090	17.948	2.32	2.21
U1337	17.95	1.64	2.16
926/929	17.9512	2.2	2.1475
1090	17.9517	2.7	2.205
1090	17.9547	2.5	2.17
926/929	17.9551	2.11	2.26625
U1337	17.957	1.42	2.26
1090	17.9584	2.75	2.11375
926/929	17.9591	2.04	2.10625
1090	17.9628	2.41	2.12125
926/929	17.963	2.15	2.22375
U1337	17.964	1.53	2.07125
1090	17.9666	2.44	2.09
926/929	17.967	2.23	2.0425
926/929	17.9693	2.24	2.0025
U1337	17.97	1.53	2.08875
1090	17.9703	2.19	2.0525
926/929	17.9714	2.03	2.0475
926/929	17.9734	1.83	1.935
1090	17.974	2.22	2.01
926/929	17.9754	2.15	2.00875
1090	17.977	2.19	2.0475
U1337	17.977	1.34	2.075
926/929	17.9774	2.13	2.055
926/929	17.9794	2.18	1.945
1090	17.9807	2.34	1.95
926/929	17.9814	2.05	2.04
926/929	17.9835	2.06	2.06125
U1337	17.984	1.27	2.05375
1090	17.9851	2.23	2.0625
926/929	17.9855	2.06	1.98625
926/929	17.9875	2.3	2.03
1090	17.9889	2.12	2.14625
926/929	17.9896	2.41	2.1175
U1337	17.991	1.44	2.1575
926/929	17.9915	2.41	2.095
1090	17.9918	2.2	2.10375
926/929	17.9935	2	2.0875
1090	17.9955	2.38	2.20125
U1337	17.997	1.8	2.1425
1090	18	2.19	2.13125
926/929	18.0022	2.28	2.16375
1090	18.0037	2.35	2.135
U1337	18.004	1.94	2.135
926/929	18.0045	2.11	2.125
1090	18.0074	2.26	2.0825
926/929	18.0092	2.15	2.01875
U1337	18.011	1.8	2.0675
1090	18.0112	2.11	2.04375
926/929	18.0116	1.94	2.00875
926/929	18.0139	1.84	1.94375
1090	18.0141	2.33	1.98875
926/929	18.0162	1.92	2.02375
1090	18.0164	1.98	2.07875
U1337	18.018	1.63	2.14625
926/929	18.0186	2.16	2.1225
1090	18.0191	2.39	2.15875
926/929	18.0209	2.38	2.11875
1090	18.0214	2.38	2.22875
1090	18.0231	2.14	2.25875
926/929	18.0232	2.21	2.225
U1337	18.025	1.66	2.20125
1090	18.0254	2.51	2.05712
926/929	18.0256	2.4	2.08462
1090	18.0282	2.12	2.08338
1090	18.0308	2.19	2.22963
U1337	18.031	1.227	2.21462
1090	18.0331	2.36	2.20463
926/929	18.0337	2.2	2.14138
1090	18.0354	2.83	2.19763
1090	18.0372	2.39	2.33175
926/929	18.0379	2.32	2.33425
U1337	18.038	1.614	2.2855
1090	18.0395	2.64	2.11075
1090	18.0421	2.3	2.13325
926/929	18.0422	2.38	2.14825
588	18.0427	1.81	2.2515
U1337	18.044	1.432	2.20525
1090	18.0444	2.57	2.0635
926/929	18.046	2.44	2.0785
1090	18.0491	2.44	2.1385
926/929	18.0498	2.27	2.0915
U1337	18.051	1.166	2.0615
1090	18.0549	2.5	1.92725
926/929	18.0577	2.29	1.926
U1337	18.058	1.056	1.951
1090	18.0635	2.33	2.094
U1337	18.065	1.366	1.96013
926/929	18.067	2.43	1.95263
1090	18.0709	2.47	1.99388
926/929	18.071	2.31	1.95138
U1337	18.072	1.429	2.06313
1090	18.0783	2.23	1.98812
U1337	18.079	1.386	1.93062
926/929	18.079	1.99	1.92562
926/929	18.0821	2.26	1.95737
926/929	18.0842	1.83	1.92112
926/929	18.085	2.01	1.98412
1090	18.0857	2.27	2.01662
U1337	18.087	1.683	1.94812
926/929	18.0878	1.94	1.98312
926/929	18.0907	1.89	2.01938
1090	18.0916	2.25	2.05812
U1337	18.094	1.712	2.0605
926/929	18.0958	2.11	2.15925
926/929	18.0964	2.3	2.238
1090	18.099	2.58	2.29675
U1337	18.101	1.702	2.3665
926/929	18.1034	2.73	2.283
1090	18.1035	2.52	2.27675
926/929	18.1053	2.72	2.243
1090	18.1074	2.27	2.20363
U1337	18.108	1.442	2.13238
1090	18.1105	2.25	2.09863
1090	18.1143	2.31	1.95775
U1337	18.115	1.387	1.9565
926/929	18.1176	2.16	2.1125
1090	18.1189	2.25	2.09125
U1337	18.122	1.593	2.0155
1090	18.1227	2.26	2.18712
1090	18.1266	2.69	2.21088
926/929	18.1282	2.08	2.15175
U1337	18.129	1.704	2.27887
1090	18.1304	2.76	2.31262
1090	18.1335	2.35	2.19562
U1337	18.136	1.777	2.23312
1090	18.1373	2.61	2.31762
1090	18.1412	2.53	2.29012
U1337	18.144	1.754	2.21637
1090	18.1444	2.38	2.30675
1090	18.1469	2.38	2.193
1090	18.1494	2.54	2.133
U1337	18.151	1.76	2.09312
1090	18.1532	2.5	2.06188
588	18.1547	1.7	2.06813
1090	18.1563	2.05	2.06312
U1337	18.157	1.435	2.05625
926/929	18.159	2.13	2.05125
1090	18.1595	2.43	2.115
1090	18.1627	2.5	2.18875
U1337	18.163	1.705	2.22288
1090	18.1652	2.46	2.24038
926/929	18.167	2.21	2.15663
1090	18.1684	2.64	2.04287
U1337	18.17	1.708	2.11225
1090	18.1723	2.27	2.0535
926/929	18.1737	1.76	2.0285
U1337	18.176	1.59	1.936
1090	18.178	2.26	1.91837
926/929	18.1794	1.99	1.90213
926/929	18.1805	2.01	1.94338
926/929	18.1813	1.9	2.04462
U1337	18.183	1.567	2.02713
926/929	18.1833	2.14	2.01963
1090	18.1849	2.09	1.95712
1090	18.1881	2.4	2.00212
926/929	18.1882	2.12	2.02
926/929	18.1882	1.93	2.03
U1337	18.189	1.51	1.98188
1090	18.1913	2.26	1.96937
926/929	18.1938	1.71	1.92937
1090	18.1944	2.22	1.89937
U1337	18.195	1.705	1.99688
1090	18.197	2.3	1.94063
926/929	18.1981	1.8	1.93975
926/929	18.1986	1.69	1.9685
1090	18.1998	2.29	2.00537
926/929	18.2017	1.81	2.06787
U1337	18.202	1.703	2.13163
1090	18.203	2.45	2.13563
926/929	18.2048	2	2.17687
1090	18.2058	2.8	2.24063
926/929	18.2079	2.31	2.339
U1337	18.208	1.722	2.35025
1090	18.2086	2.62	2.36525
926/929	18.211	2.32	2.18637
1090	18.2113	2.49	2.16763
1090	18.2141	2.54	2.26487
926/929	18.2141	2.12	2.21362
U1337	18.215	1.369	2.05675
926/929	18.2172	2.16	2.01425
1090	18.2196	2.5	2.00425
926/929	18.2203	2.21	2.04425
U1337	18.221	1.065	2.04438
926/929	18.2234	2.15	2.01938
926/929	18.2264	2.46	1.95313
1090	18.2268	2.44	1.82412
U1337	18.228	1.37	1.9935
926/929	18.2296	1.96	1.976
926/929	18.2332	1.97	1.91475
U1337	18.234	1.178	1.7905
1090	18.2358	2.42	1.8505
926/929	18.2366	2.01	1.91925
926/929	18.2401	1.97	1.86637
U1337	18.241	1.446	1.96162
926/929	18.2436	1.85	1.91912
1090	18.2449	2.51	1.82563
U1337	18.247	1.547	1.87813
926/929	18.247	1.94	1.95988
926/929	18.2505	2.08	1.97863
U1337	18.253	1.262	1.88413
1090	18.2539	2.39	1.93825
926/929	18.2541	2.1	1.97325
926/929	18.2578	2	1.92075
U1337	18.26	1.754	1.98013
926/929	18.2615	1.98	1.98638
1090	18.2627	2.22	1.96637
926/929	18.2653	1.66	2.02513
U1337	18.266	1.737	2.02963
1090	18.2671	2.44	1.98838
926/929	18.269	1.94	1.93962
1090	18.2724	2.47	1.98175
926/929	18.2728	1.79	2.07337
U1337	18.273	1.65	1.98962
926/929	18.2765	1.83	2.06838
U1337	18.279	1.997	2.01963
1090	18.2797	2.47	2.00788
926/929	18.2803	1.77	2.10038
1090	18.2834	2.57	2.16162
926/929	18.284	2.08	2.19825
U1337	18.286	1.696	2.187
1090	18.2863	2.39	2.17712
926/929	18.2878	2.32	2.15338
1090	18.2899	2.29	2.17963
926/929	18.291	2.38	2.25762
U1337	18.292	1.691	2.23637
926/929	18.2931	2.38	2.24262
1090	18.2943	2.29	2.17525
926/929	18.2951	2.32	2.11775
926/929	18.2973	2.22	2.19512
1090	18.298	2.37	2.17887
U1337	18.299	1.751	2.19888
926/929	18.2994	1.92	2.10888
1090	18.3009	2.31	2.11513
926/929	18.3024	2.25	2.11013
1090	18.3045	2.45	2.18
U1337	18.305	1.6	2.16475
926/929	18.3055	2.27	2.15225
926/929	18.3087	2.33	2.18975
1090	18.31	2.31	2.06988
U1337	18.311	1.798	2.14613
926/929	18.312	2.21	2.19488
1090	18.3157	2.55	2.072
U1337	18.318	1.491	2.1245
926/929	18.3184	2.21	2.1785
1090	18.3214	2.66	2.08788
U1337	18.324	1.347	2.06038
1090	18.3271	2.73	2.17025
926/929	18.3292	2.23	2.113
U1337	18.331	1.485	2.0905
1090	18.3317	2.33	2.20962
926/929	18.3331	2.37	2.17962
U1337	18.335	1.752	2.19087
1090	18.3374	2.48	2.24937
[truncated: 7,289 more rows]
