# Supplementary material for: Oligocene–Miocene paleoceanography off the Wilkes Land Margin (East Antarctica) based on organic-walled dinoflagellate cysts
Source: Copernicus journal article supplement (doi:10.5194/cp-2017-148), 2017-12-05
Supplement: Supplementary file [file cp-2017-148-RC3-supplement.pdf]

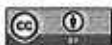

45 **(subpolar) oceanic frontal systems have varied in concordance with Oligocene-**  
46 **Miocene glacial-interglacial climate variability.**

47

### 48 1. Introduction

49 The proportion of the East Antarctic ice sheet that is presently grounded  
50 below sea level is much larger than originally <sup>interpreted</sup> assumed (Fretwell et al., 2013). This  
51 implies that <sup>much</sup> more ice is sensitive to basal melting by warm waters than  
52 previously thought (Shepherd et al., 2012; Rignot et al., 2013; Wouters et al., 2015),  
53 and that a <sup>much</sup> higher amplitude and faster rate of sea-level rise <sup>might prevail</sup> under future  
54 climate scenarios than previously <sup>predicted</sup> thought (IPCC, 2013). Studying the state and  
55 variability of Antarctic ice volume <sup>in periods</sup> during ~~past~~ episodes with high atmospheric CO<sub>2</sub>  
56 concentrations (*p*CO<sub>2</sub>) <sup>might</sup> provide additional <sup>insight</sup> ~~understanding~~ into ice/ocean  
57 feedback processes. Foster and Rohling (2013) compared sea-level and atmospheric  
58 *p*CO<sub>2</sub> concentrations on geological timescales and <sup>suggested</sup> highlighted that global ice sheets  
59 were <sup>more</sup> insensitive to climate change <sup>when</sup> under atmospheric *p*CO<sub>2</sub> <sup>ranged</sup> between 400 and  
60 650 parts per million in volume (ppmv). During the Oligocene and Miocene  
61 atmospheric *p*CO<sub>2</sub> ranged between 400 and 650 ppmv (Foster et al., 2012; Badger et  
62 al., 2013; Greenop et al., 2014). Crucially, similar *p*CO<sub>2</sub> levels are expected for the near  
63 future given unabated carbon emissions (IPCC, 2013), implying that global ice volume  
64 may not change much under these *p*CO<sub>2</sub> scenarios.

65 In contrast to the invariant global ice volume <sup>preserved</sup> inferred by Foster and Rohling  
66 (2013), a strong (up to 1 per mille; ‰) variability is <sup>observed</sup> in deep-sea benthic  
67 foraminiferal oxygen isotope (hereafter benthic δ<sup>18</sup>O) data (Pälike et al., 2006;  
68 Beddow et al., 2016; Holbourn et al., 2007; Liebrand et al., 2011; 2017). These

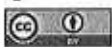

69 benthic  $\delta^{18}\text{O}$  data reflect changes in continental ice volume (notably in Antarctica), in  
70 combination with deep-sea temperature, with the latter strongly coupled to polar  
71 surface-water temperature, as deep-water formation was predominantly located at  
72 high latitudes (Herold et al., 2011). High-amplitude variations in benthic  $\delta^{18}\text{O}$  thus  
73 suggest either (I) strong climate dynamics in the high latitudes with relatively minor  
74 ice-volume change (which is in accordance with numerical modelling experiments  
75 (Barker et al., 1999) and the inferences of Foster and Rohling (2013)), or (II) strong  
76 fluctuations of the Antarctic ice-volume, with relatively subdued temperature  
77 variability (which is in accordance with indications for an unstable Antarctic ice  
78 sheets under warmer-than-present climates (Cook et al., 2013; Greenop et al., 2014;  
79 Rovere et al., 2014). In the latter case one assumes present-day  $\delta$ -composition (-42‰ versus  
80 standard mean ocean water (SMOW)) for the Oligocene–Miocene Antarctic ice-sheets  
81 and modern deep water temperature (2.5°C), then the Oligocene–Miocene benthic  
82  $\delta^{18}\text{O}$  fluctuations suggest long-term ice-sheet-variability ranging between a present-  
83 day size for 27–23 Ma and absence during numerous other time intervals (Liebrand  
84 et al., 2017). Meanwhile, deep-sea temperatures have fluctuated considerably on  
85 geologic time scales (as is evident from ice-free geologic episodes –e.g., Zachos et al.,  
86 2008), suggesting there is no reason to assume that it did not fluctuate during the  
87 Oligocene or Miocene as well. Therefore, likely a combination of deep-sea  
88 temperature and ice-volume changes is represented in these records, but it is  
89 intrinsically impossible to determine the relative contribution of both factors from  
90 benthic  $\delta^{18}\text{O}$  data alone. Clearly, ice-proximal reconstructions of climate, ice sheet and  
91 oceanographic conditions are required to provide an independent assessment of the  
92 stability of ice sheets under these  $p\text{CO}_2$  conditions.

primarily and

therefore

interpretations

? to interpretations

the

its or the

varied markedly

?  
need clarity

further

(Gallagher et al. 2013)

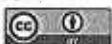

93 While the Oligocene–Miocene <sup>climate state</sup> (in terms of  $p\text{CO}_2$  conditions), bear analogy <sup>was similar to</sup>  
94 to our future, <sup>estimation of</sup> any such investigation must take into account the uncertainties <sup>future projection</sup>  
95 involved in Antarctic paleotopography, which determines the proportion of marine-  
96 based versus land-based ice during the Oligocene. A lower Antarctic continent would  
97 result in more ice sheets being potentially sensitive to basal melt, and as such a  
98 higher sensitivity of the ice sheet to climate change. <sup>In addition</sup> On top of this, <sup>one should take</sup>  
99 note of the fundamentally different paleogeographic configuration of the Southern <sup>make</sup>  
100 Ocean during that time as compared to today (Figure 1). The development and <sup>more</sup>  
101 strength of the Antarctic Circumpolar Current (ACC) connecting the Atlantic, Indian <sup>impersonal</sup>  
102 and Pacific Ocean basins (Barker and Thomas, 2004; Olbers et al., 2004) depend on  
103 the basin configuration (width and depth of the gateways and position of continental  
104 landmasses). The exact timing when the ACC reached its modern-day strength is still  
105 uncertain, ranging from the Middle Eocene (41 Ma) to as young as Miocene (23 Ma,  
106 Scher and Martin, 2004; Hill et al., 2013; Scher et al., 2015). <sup>Whether, and if so, how</sup>  
107 the development of the ACC has influenced latitudinal heat transport, ice-ocean <sup>is also not well known extent</sup>  
108 interactions and the stability of Antarctic continental ice remains even more elusive.  
109 To directly assess the role of ice-proximal oceanography on ice-sheet stability  
110 during the Oligocene–Miocene, ice-proximal proxy-records are required. Several <sup>expedition</sup>  
111 ocean drilling efforts in the past have been undertaken to <sup>investigate</sup> provide insight in the  
112 history of the Antarctic ice sheets (Cooper and O'Brien, 2004; Barker et al., 1998;  
113 Wise and Schlich, 1992; Barrett, 1989; Robert et al., 1998; Wilson et al., 2000;  
114 Harwood et al., 2006; Exon et al., 2004; Escutia et al., 2011a). For some of these  
115 sedimentary archives, establishment of age control was particularly challenging due  
116 to the <sup>lack</sup> paucity of useful and <sup>proper means</sup> to calibrate the record to the international

meaning?

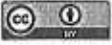

117 time scale. As a consequence, their full use for the generation of paleoceanographic  
118 proxy records and ice sheet reconstructions has remained limited.

what proxies & dating techniques

119 In 2010, Integrated Ocean Drilling Program (IODP) Expedition 318 drilled an  
120 inshore-to-offshore transect off Wilkes Land (Fig. 1a), a sector of East Antarctica that  
121 is assumed to be highly sensitive to continental ice-sheet melt (Escutia et al., 2011b).

cored

122 The sediments recovered from IODP Hole U1356A are from the continental rise of  
123 this margin (Escutia et al., 2011b) and hence contain a mixture of shelf-derived  
124 material and pelagic sedimentation. Dinoflagellate cyst events in this record have  
125 been accurately tied to the international time scale through integration with  
126 calcareous nannofossil, diatom and magnetostratigraphic data (Bijl et al., in press).

interpreted

robust

127 The result is a – for Southern Ocean standards – solid stratigraphic age frame for the  
128 Oligocene–Miocene part of the record of Hole U1356 (Fig. 2; Table 1). In this paper,  
129 we investigate the dinocyst assemblages from this succession by utilizing the strong  
130 relationships between dinocyst assemblage composition and surface-water features  
131 of today's Southern Ocean (Prebble et al., 2013). We reconstruct the oceanographic

? different word here

132 regimes during the Oligocene and mid-Miocene, and speculate on their implications  
133 for oceanographic settings. We further compare the palynological data with detailed  
134 sedimentological descriptions from Salabarnada et al. (submitted this volume).  
135 Pairing the sedimentological interpretation and biomarker-derived absolute sea  
136 surface temperature (SST) reconstructions from the same core (Hartman et al.,  
137 submitted this volume) with our dinocyst assemblage data, we assess the  
138 oceanographic variability off Wilkes Land from the dinocyst assemblages both at  
139 glacial-interglacial and long-term times scales.

er

140

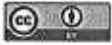

141 **2. Material**

142 2.1 Site description for IODP Hole U1356A

143 Samples were taken from IODP Hole U1356A, <sup>cored</sup> drilled on the continental rise of  
144 the Wilkes Land Margin, East Antarctica (Figure 1a; present coordinates 63°18.6' S,  
145 135°59.9' E; Escutia et al., 2011b). We use the paleolatitude calculator  
146 [www.paleolatitude.org](http://www.paleolatitude.org) of van Hinsbergen et al. (2015) to reconstruct the  
147 paleolatitudinal history of the site (Figure 1, between -59.8±4.8°S and -61.5±3.3° S  
148 between 34 Ma and 13 Ma, respectively). The single hole at Site U1356 reaches a  
149 depth of 1006.4 m <sup>Edoo</sup> into the seabed (Escutia et al., 2011b). Oligocene to late Miocene  
150 sediments were recovered between 890 and 3 mbsf (Figure 2; Tauxe et al., 2012;  
151 revised according to Bijl et al., in press). The uppermost 95 meters of the hole were  
152 poorly recovered; sediments consisted of unconsolidated mud strongly disturbed by  
153 rotary drilling (Escutia et al., 2011b). Hence, we focused our investigation on the  
154 interval between Cores 11R to 95R Section 3 (95.4 to 894 mbsf; 10.8-33.6 Ma; Figure  
155 2).

156

157 2.2 Lithology in IODP Hole U1356A

158 In the ~~studied~~ interval between 95.4 and 894 mbsf, nine lithologic units have  
159 been recognized during shipboard analysis (Figure 2; et al., 2011b). Salabarnada et al.  
160 (submitted this volume) presents a detailed lithologic study of the Oligocene  
161 sediments. <sup>To</sup> For ~~the~~ <sup>where</sup> grouping of our results, we use the <sup>litho</sup> lithologic facies from  
162 Salabarnada et al. (submitted this volume), as outlined in Table 2. For the Miocene  
163 interval of Site U1356, such a detailed lithologic description is not yet available;  
164 therefore we treat the Miocene sediments as one ~~separate~~ lithologic unit in this

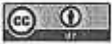

1  
NAF  
White section  
up  
C. Long / E. D. ...  
Smothers  
per section  
up-comp.

165 paper. For the Miocene, we here give a brief summary of the observations published  
166 in the IODP Expedition 318 post-cruise report (Escutia et al., 2011b). Miocene  
167 sediments between 95 and 400 mbsf reflect *are increasingly* increasing consolidation down-core, and  
168 comprise diatom ooze and diatom-rich silty clays. The more consolidated bedding has  
169 caused better preservation *ed* of original bedding structures. From 278.4 to 459.4 mbsf,  
170 the lithology lacks gravel-sized clasts, but is otherwise similar to up-  
171

172 2.3 Bio-magnetostratigraphic age model for IODP Hole U1356A

173 Stratigraphic constraints for the Oligocene–Miocene succession from IODP  
174 Hole U1356A are provided through calcareous nannoplankton, radiolarian, diatom  
175 and sparse palynological biostratigraphy, complemented with magnetostratigraphy  
176 (Tauxe et al., 2012). Bijl et al. (in press) and Crampton et al. (2016) have updated the  
177 existing age model for Site U1356 for the Oligocene and Miocene part of the  
178 succession, respectively. Thereby, they recalibrated to the international time scale of  
179 Gradstein et al., 2012. We here follow these new insights of the age model (Table 1).  
180 We infer ages by linear interpolation between tie points (Figure 2; Table 1).

182 2.4 Depositional setting IODP Site U1356

183 The depositional setting of Site U1356 changed from a shallow mid-  
184 continental shelf in the early Eocene (Bijl et al., 2013a) to a deep continental rise  
185 setting *by* in the Oligocene (Houben et al., 2013) due to subsidence of the Wilkes Land  
186 Margin (e.g., Close et al., 2009). Regional extrapolation *of correlation facies* of the lithology at U1356A via  
187 seismic profiles suggests a mix of distal-fan and hemipelagic sedimentation during  
188 the early Oligocene, grading into channel-levee deposits *in* towards the later Oligocene

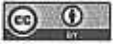

189 (Escutia et al., 2011b). The boundary between these two different depositional  
190 settings occurs at ~650 mbsf; there, sedimentation rates increase, and the  
191 documentation of mass-transport deposits from this depth upwards suggest shelf-  
192 derived erosion events on the Wilkes Land continental slope (Escutia et al., 2011b).

193

### 194 3. Methods

#### 195 3.1 Palynological sample processing

196 We refer to Bijl et al. (in press) for sample processing and analytical  
197 procedures used. Both were according to standard procedures (e.g., Bijl et al., 2013b).  
198 The 25 species of dinocysts new to science, which are formally (2 species) and  
199 informally (23 species) described in Bijl et al. (in press) fit into known and extant  
200 genera and therefore could be confidently included in the ecological groups as  
201 described below.

202

#### 203 3.2 Ecological grouping of dinocyst taxa

204 Bijl et al. (in press) provided additional statistical evidence to distinguish *in*  
205 *situ* dinocysts from those that are reworked from older strata. In this paper, we follow  
206 the interpretations of Bijl et al. (in press) and divide the dinocyst species into a  
207 reworked and an *in situ* part (Table 3). To use the *in situ* dinocyst assemblages for  
208 oceanographic reconstructions, we rely on the observation that many taxa in the  
209 fossil assemblages have morphologically closely related modern counterparts. This  
210 approach takes advantage of studies on present-day relationships between Southern  
211 Ocean microplankton in general and dinoflagellates in particular and their surface-  
212 water characteristics (e.g., Eynaud et al., 1999; Esper and Zonneveld, 2002, 2007;

Not in references  
Need more detail here  
In case reader cannot access this paper

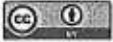

213 Prebble et al., 2013). We assign Oligocene–Miocene dinocyst taxa to present-day eco-  
214 groups interpreted from the clusters identified by Prebble et al. (2013), which seem  
215 to be closely related to the oceanic frontal systems in the Southern Ocean (Figure 3).  
216 Supporting evidence for the ecologic affinities for the dinocyst groups comes from  
217 empirical data (Sluijs et al., 2005), for instance when it comes to the oceanic affinities  
218 of *Nematosphaeropsis labyrinthus*, *Operculodinium* spp., *Pyxidinoopsis* spp. and  
219 *Impagidinium* spp. There is further abundant evidence, both empirically (e.g., Sluijs et  
220 al., 2003; Houben et al., 2013) and from modern observations (Zonneveld et al., 2013;  
221 Prebble et al., 2013; Eynaud et al., 1999), which link the abundance of  
222 protoperidinioid dinocysts to high surface-water primary productivity. The arguably  
223 most important inference from the surface-sample study of Prebble et al. (2013) is  
224 that *Selenopemphix antarctica* is common to dominant (10–90%) in proximal sea-ice  
225 settings south of the Antarctic polar front (AAPF). Notably, none of the surface  
226 samples outside of the AAPF have dominant *Selenopemphix antarctica* (Prebble et al.,  
227 2013). Another important observation is that the surface samples south of the AAPF  
228 are devoid of gonyaulaccean dinocysts, with the exception of two species of  
229 *Impagidinium* (i.e., *I. pallidum* and *I. sphaericum*) which can occur, although neither  
230 abundantly (Prebble et al., 2013) nor exclusively (e.g., Zevenboom, 1995; Zonneveld  
231 et al., 2013), in ice-proximal locations. Another important observation is the  
232 occurrence of abundant *Nematosphaeropsis labyrinthus* exclusively in regions outside  
233 of the Subantarctic Front, and particularly close to the Subtropical Front. In summary,  
234 from proximal Antarctic to outside the frontal systems, Prebble et al. (2013)  
235 documents dominance of *S. antarctica* south of the AAPF, dominance of other  
236 protoperidinioid dinocysts at and N of the AAPF, mixed protoperidinioid and

are interpreted

example

have known oceanic affinities?

distribution

importantly noted is

In addition

lack

lack

may

is common

clarify

are present

near

notes the

dominate only



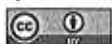

237 gonyaulacoid dinocysts (with a notable common occurrence of *Nematosphaeropsis*  
238 *labyrinthus* at the SAF and mixed gonyaulacoid dinocysts at and outside of the STF.  
239 These trends represents the transition from sea-ice influenced to cold upwelling/high  
240 nutrient to warm-temperate/lower nutrient conditions, respectively. We use the  
241 affinities obtained by Prebble et al. (2013) to reconstruct past oceanographic  
242 conditions at the Wilkes Land continental margin.

reword clarify  
)?

#### 244 4. Results

##### 245 4.1 Palynological groups

246 In our palynological analysis we separated palynomorph groups into four  
247 categories: *In situ* dinocysts, reworked dinocysts (following Bijl et al. (in press), Table  
248 3), acritarchs and terrestrial palynomorphs. Our palynological slides further contain a  
249 varying amount of pyritized diatoms and a minor component of amorphous  
250 palynofacies, which is not further considered ~~in this study~~. The relative abundance of  
251 the four palynomorph groups varies considerably ~~throughout the record~~, as do their  
252 absolute abundances (Figure 4). Reworked dinocysts are present to common  
253 ~~throughout the record~~, ~~but~~ <sup>and</sup> are particularly abundant in the lowermost 40 meters of  
254 the Oligocene and in the Upper Oligocene. *In situ* dinocysts <sup>dominate the</sup>  
255 palynomorph assemblage <sup>in</sup> ~~during the~~ mid-Oligocene and mid-Miocene. Chorate,  
256 spheromorph and *Cymatiosphaera*-type acritarchs (which are not further  
257 taxonomically subdivided ~~in this study~~) <sup>dominate the</sup> assemblage <sup>in</sup> during the late  
258 Oligocene <sup>through to</sup> ~~and into~~ the mid-Miocene, while terrestrial palynomorphs (which are  
259 considered *in situ* and not reworked from older strata (Strother et al., 2017)) are a  
260 constant minor component of the total palynomorph assemblage (Fig. 4).

and absolute  
1  
1  
1

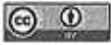

261

262 4.2 *In situ* dinocyst assemblages

263 Throughout the Oligocene, *in situ* dinocyst assemblages are dominated by

264 protoperidinioid dinocysts, notably *Brigantedinium* spp., *Lejeunecysta* spp., *Malvinia*  
265 *escutiana*, and *Selenopemphix* spp. (Figure 4), all of which are considered associated

266 ~~with~~ heterotrophic dinoflagellates. Among these protoperidinioid cysts, *S. antarctica*  
267 is common to abundant only in the first 1.5 million years of the Oligocene

268 ~~represented in the core material~~ (33.6–32.1 Ma), and during and after the mid-

269 Miocene climatic transition (<14.2 Ma; Fig. 5). ~~The remainder of the record is~~  
270 ~~generally devoid of *S. antarctica*. This is much in contrast to the dinocyst assemblages~~

271 ~~at Site U1356 today~~, which are dominated by this taxon (Prebble et al., 2013). Instead,  
272 other protoperidinioid dinocysts dominate, such as *Brigantedinium* spp., several

273 *Lejeunecysta* species and *Selenopemphix nephroides*, which have close affinities to  
274 high-nutrient conditions in general (e.g., Harland et al., 1999; Zonneveld et al., 2013)

275 but are not ~~specifically~~ <sup>linked</sup> restricted to sea-ice-proximity or the Southern Ocean. Today,  
276 these three genera dominate dinocyst assemblages in high-nutrient regions at or

277 outside of the AAPF (Prebble et al., 2013). We also encountered a <sup>varying</sup> abundance  
278 of protoperidinioid dinocysts, which ~~could not be placed with confidence into~~

279 established protoperidinioid dinocyst genera. These are <sup>are present</sup> ~~grouped~~ <sup>classified</sup>  
280 protoperidinioid spp. pars (Figure 4), and are here assumed to ~~exhibit the same~~

281 heterotrophic life-style as ~~the~~ other protoperidinioid dinocyst genera. <sup>interpreted / have had</sup>  
<sup>same? a similar</sup>

282 Next to peridinioid dinocysts, also gonyaulacoid dinocysts occur commonly to  
283 abundantly throughout the record from Site U1356. They <sup>are included</sup> comprise both known and

284 previously unknown (Bijl et al., in press) species of *Batiacashaera*, *Pyxidinospis*,

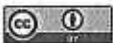

285 *Nematosphaeropsis*, *Impagidinium*, and *Operculodinium* (Fig. 4; 5). Except for the  
286 extinct genus *Batiacasphaera*, all the other genera are still extant and are formed by  
287 phototrophic dinoflagellates. The abundance of these presumably mostly autotrophic  
288 taxa (Zonneveld et al., 2013) goes at the expense of the assumed heterotrophic  
289 protoperidinioid dinocysts. A remarkable increase is not associated with the mid-  
290 Miocene Climate Optimum (between ~17 and 15 Ma; Fig. 4, 5; Sangiorgi et al., in  
291 review). Of these taxa, *Nematosphaeropsis* is thought to be associated with frontal  
292 systems of the present-day Southern Ocean (Prebble et al., 2013) and also in the  
293 North Atlantic Ocean (Boessenkool et al., 2001; Zonneveld et al., 2013).

With the exception of  
atypicals  
likely  
cf  
marked in these data  
??  
reword

294  
295 4.5 Comparison between palynological data and lithological interpretations

facies?

296 The Oligocene sediments from Site U1356 comprise distinctive alternations of  
297 lithologic facies throughout the section (Salabarnada et al., submitted this volume,  
298 Figure 2). They are interpreted to reflect changes in the oceanographic regime, with  
299 relations to glacial-interglacial changes (Salabarnada et al., submitted this volume).  
300 Carbonate deposits, pelagic claystones and bioturbated, carbonate-bearing silty  
301 claystones are interpreted as interglacial deposits, while the laminated lithologies  
302 reflect glacial deposits (Salabarnada et al., submitted this volume). Mass-transport  
303 deposits reflect times of major sediment transport from the continental shelf. The  
304 lower Oligocene glauconitic sandstones were interpreted to reflect episodes of  
305 redeposition of winnowed upper Eocene shelf sediments (Sluijs et al., 2003; Houben,  
306 2012). We here evaluate and compare the palynological content of each of these  
307 lithologies, both in terms of absolute and relative abundance of the main

Not seen by reviewer!

variability  
significant  
are  
are  
In this work we document variability in

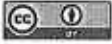

308 palynomorph groups: reworked dinocysts, *in situ* dinocysts, acritarchs and terrestrial  
309 palynomorphs and relative abundance of *in situ* dinocyst eco-groups.

310

#### 311 4.5.1 Palynomorph groups and lithology

312 There are ~~distinct~~ differences in the relative and absolute abundances of  
313 palynomorph groups between the different lithologies (Figure 6). The highest relative  
314 and absolute abundances of reworked dinocysts occur in the lower Oligocene  
315 reworked glauconitic sandstones, which is in line with previous inferences of Houben  
316 et al. (2013). The mass-transport deposits contain abundant reworked dinocysts. The  
317 relative and absolute abundance of *in-situ* dinocysts does not vary much between the  
318 different lithologies, with the exception of the pelagic clays, in which *in situ* dinocysts  
319 are much lower in relative and absolute abundance (Figure 6). The opposite pattern  
320 emerges for acritarchs, which reach highest relative and absolute abundances in the  
321 pelagic clays (Figure 6). Terrestrial palynomorphs are most abundant in the  
322 glauconitic contorted sandstones (Figure 6).

323

#### 324 4.5.2 *In situ* dinocyst eco-groups and lithology

325 We also compared the *in situ* dinocyst eco-groups with predominant  
326 lithological facies (Figure 7). The abundance of *Selenopemphix antarctica* is low  
327 throughout the record (0-5%), with the exception of the interval post-dating the  
328 Miocene Climatic Optimum (MCO) interval and the lowermost Oligocene. We note  
329 that in the lower Oligocene, high abundances of *S. antarctica* and *Malvinia escutiana*  
330 are mostly connected to glauconitic sandstones and the mass-transport deposits, and  
331 rarely occur in the other lithologies (Figure 7). We however think that these species

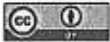

332 represent part of the ~~in situ~~ assemblage in an otherwise dominantly reworked  
333 dinocyst assemblage, because these were never found in Eocene sediment in the  
334 region before. *Lejeunecysta* spp. shows significantly higher relative abundances in the  
335 mass-transport and glacial deposits, and substantially lower abundances in the pelagic  
336 clays, interglacial deposits and in the Miocene. *Brigantedinium* spp. shows invariable  
337 relative abundances in the different lithologies, and the *Protoperidinium* spp. pars  
338 group shows highest abundance in the pelagic clays (Figure 7). Overall, the relative  
339 abundances of all (proto)peridinioid dinocysts in the *in situ* assemblage is highest in  
340 the glacial deposits and pelagic clays, and substantially lower in interglacial deposits  
341 and in the Miocene. Indeed, several gonyaulacoid dinocyst taxa (such as  
342 *Nematosphaeropsis* spp., *Pyxidiniopsis* sp., *Operculodinium* spp., and *Impagidinium*  
343 spp.) show higher relative abundances in interglacial than in glacial deposits. We thus  
344 observe a marked difference in the relative abundances of gonyaulacoid dinocysts  
345 over peridinioid dinocysts between glacial and interglacial deposits.

## 347 5. Discussion

### 348 5.1 Paleoceanographic interpretation of the dinocyst assemblages

#### 349 5.1.1 Surface-ocean nutrient conditions

350 The dominance of heterotrophic dinoflagellate cysts in the Oligocene-Miocene  
351 dinocyst assemblages indicate overall high nutrient levels in the surface waters. We  
352 infer therefore that in general, surface-waters overlying Site U1356 experienced  
353 upwelling associated to the AAPF during most of the Oligocene and Miocene.  
354 However, and surprisingly, the occasionally abundant oligotrophic cyst taxa  
355 encountered in our record suggest that at times, surface waters were much less

to be  
assemblage of by  
is  
as  
? continuing  
case has a marked  
compared to its relative  
abundance  
is not  
related  
is  
I think it is  
?  
repetition

? subjective

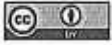

356 nutrient-rich, ~~supporting an oligotrophic dinoflagellate assemblage~~. These dinocysts  
357 are outer shelf to oceanic or outer neritic taxa (e.g., Sluijs et al., 2005; Zonneveld et al.,  
358 2013; Prebble et al., 2013), which makes it unlikely they were reworked from the  
359 continental shelf. Indeed, these taxa show low relative abundances in the mass-  
360 transport deposits (Figure 6); hence, we interpret that these taxa are part of the *in*  
361 *situ* pelagic assemblage and reflect warming of surface waters, rather than them being  
362 reworked. Although species within these genera have relatively long stratigraphic  
363 ranges extending back into the Eocene, most of the species encountered at U1356  
364 ~~have never been found~~ in Eocene continental shelf sediments in the region (e.g., Bijl et  
365 al., 2011; 2013a, b; Brinkhuis et al., 2003a, b; Levy and Harwood, 2000; Wrenn and  
366 Hart, 1988). This ~~tends further support against them being reworked from Eocene~~  
367 shelf material, in addition, the statistical approach also interprets these species to be  
368 part of the *in situ* assemblage (Bijl et al., in press). Now that we have abundant  
369 evidence that these autotrophic taxa are part of the *in situ* pelagic assemblage, we can  
370 interpret these assemblages in terms of their paleoceanographic affinities. The  
371 occasional abundance of oligotrophic taxa suggests nutrient levels must have been  
372 low compared to the same region today. The absence of these taxa in modern surface  
373 waters south of the AAPF is probably caused by a combination of factors: low sea  
374 surface temperatures, isolation by strong eastward currents, but also the abundance  
375 and seasonal concentration of nutrients, which make the Antarctic proximal surface  
376 waters a very specialistic niche. Apparently, surface water conditions during the  
377 Oligocene and Miocene were such that these oligotrophic species could at times  
378 proliferate so close to the Antarctic margin.

particular

particular are rare  
merely  
related to warming?

are not present

ca. makes it unlikely that they were

??

interesting

maxima  
er

may

likely

repetition?  
clarify

? explain  
better  
clarify

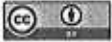

best modern analogue  $M_2$  of

380 5.1.2 sea-surface temperature  
381 The average dinocyst assemblages in our record point to the Southern margin of New  
382 Zealand and Tasmania as the best modern analogue (inferred from Prebble et al.,  
383 2013; Figure 2). Those regions today feature a mix between protoperidinioid  
384 dinocysts and gonyaulacoid dinocyst genera such as *Nematosphaeropsis*,  
385 *Operculodinium* and *Impagidinium*. These assemblages occur at present in surface-  
386 waters with mean annual temperatures of 8-17°C (Prebble et al., 2013). A bayesian  
387 approach on the TEX<sub>86</sub> index values at U1356 (presented in Sangiorgi et al.,  
388 submitted; Hartman et al., submitted this volume) indicates exactly the same region  
389 as modern analogue for the TEX<sub>86</sub> index values found (Hartman et al., submitted this  
390 volume) as for the dinocysts (Prebble et al., 2013); both approaches indicate the same  
391 paleotemperature range for the Oligocene-Miocene at U1356. These two proxies thus  
392 independently point to a temperate, much warmer paleoceanographic regime close to  
393 Antarctica during the Oligocene and Miocene with the nearest modern analogue  
394 being offshore Southern New Zealand and Tasmania. Supporting evidence for  
395 temperate Oligocene-Miocene surface waters comes from the abundance of  
396 nannofossils encountered in the same Oligocene-Miocene sediments (Escutia et al.,  
397 2011b). Today, carbonate-producing plankton is not abundant in high-latitude  
398 surface waters south of the AAPF (Eynaud et al., 1999). Moreover, the remains of the  
399 few carbonate-producing organisms living at high latitudes rarely reach the ocean  
400 floor because strong upwelling of relatively CO<sub>2</sub>-rich, corrosive waters (e.g., Olbers et  
401 al., 2004). Hence, the presence of carbonate-rich intervals during the Oligocene-  
402 Miocene at Site U1356, along with the encountered oligotrophic, temperate dinocysts,  
403 suggests fundamentally warmer surface-water conditions than present.

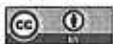

404

405 5.1.3 Paleooceanography

406 The strong similarity of Oligocene–Miocene dinocyst assemblages at Site

407 U1356 to those today occurring much further north (e.g., around Tasmania and

408 Southern New Zealand (Prebble et al., 2013) suggests a fundamentally different

409 modus operandi of Southern Ocean oceanography. The strict latitudinal separation of

410 dinocyst assemblages throughout the Southern Ocean today (Prebble et al., 2013) is

411 likely due to the different water masses present across the oceanic fronts and

412 strong wind-driven divergence around 60°S (known as the Antarctic Divergence; e.g.,

413 Olbers et al., 2004), strong sea-ice season and/or the vigorous Antarctic Circumpolar

414 Current are in place. The strength and position of the AAPF during the Oligocene–

415 Miocene is not well understood. GCM experiments under Miocene boundary

416 conditions suggest that west and east wind drifts prevailed south and north of 60°S,

417 respectively (Herold et al., 2011). This position of the winds determines the average

418 position of the Antarctic Divergence at 60°S during the Oligocene and Miocene, like

419 today. This would mean that Site U1356 likely was directly overlain by the AAPF.

420 However, the significantly warmer, more oligotrophic character of the dinocyst

421 assemblages offshore Wilkes Land throughout the Oligocene–Miocene argues against

422 a close position to the AAPF. The position of the AAPF relative to the position of Site

423 U1356 strongly determines the likelihood of southward transport of low-latitude

424 waters towards the site. A southward position of the AAPF relative to Site U1356

425 would greatly enhance the possibility for southward migration of temperate water

426 masses towards the site. A northward position of the AAPF relative to the site, would

427 make such much more difficult. The presence of carbonate in these deep marine

meaning?

ic state? strong

and

alike

known

similar to

suggest

nature

suggest the area

did not lie under

? clarify

for example

would have led to the

whereas the

data do not support



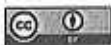

428 sediments also suggests that upwelling of corrosive waters through the (proto-  
429 Antarctic Divergence was either much reduced or located elsewhere. Therefore, we  
430 deduce that the occurrence of the oligotrophic, temperate dinocysts is evidence for a  
431 southward position of the AAPF relative to the position of Site U1356.

432 The separate averaging of dinocyst assemblages for glacial and interglacial  
433 deposits (Figure 7) allows us to reconstruct the glacial-interglacial surface  
434 oceanographic changes throughout the Oligocene. This approach suggests that  
435 substantial paleoceanographic dynamics were associated with Oligocene glacial-  
436 interglacial cycles. Alongside the 2-3 °C SST variability during glacial-interglacial

437 cycles at this same site (Hartman et al., submitted this volume), dinocyst assemblages  
438 contain more oligotrophic, temperate dinocysts during interglacial intervals,  
439 compared to glacial intervals when more eutrophic, colder dinocysts proliferated.

440 This could be the result of a slight latitudinal movement of oceanic frontal systems  
441 (notably the AAPF), as has been reconstructed for the Southern Ocean fronts during  
442 the most recent glacial to interglacial transition (e.g., Kohfeld, et al. 2013). The

443 difference in dinocyst assemblages between glacial and interglacial deposits might be  
444 explained by a south position of the AAPF during interglacials, allowing for temperate  
445 oligotrophic surface waters to reach the Site, while during glacials the AAPF migrated  
446 northward over Site U1356, causing cold, high-nutrient conditions.

447

#### 448 5.2 Implications for Oligocene-Miocene ocean circulation

449 Only in the lowermost Oligocene and in strata representing the mid-Miocene  
450 climatic transition and later (14.4 Ma and younger) the dinocyst assemblages bear  
451 similarities to modern proximal-Antarctic assemblages (Prebble et al., 2013), with

These assemblages are characterised

from mislocation  
absent  
interpreted here  
reflect

variability  
may be used  
variability due

were  
and  
dominated

may related to  
similar to that  
variability

repetition

are

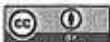

452 high abundances of *Selenopemphix antarctica*. Even in those intervals ~~however~~, the  
453 relative abundances of *S. antarctica* does not reach present-day values ~~at the same~~  
454 ~~site~~. The absence of a ~~strong shift towards~~ modern-day ~~the~~ assemblages in our  
455 record ~~can~~ <sup>map</sup> be interpreted to reflect a weaker-than-present ACC, in line with  
456 numerical models (Herold et al., 2012; Hill et al., 2013). The ACC itself <sup>is</sup> represents an  
457 important barrier for latitudinal surface-water transport towards the Antarctic  
458 margin, ~~in addition to the Antarctic Divergence~~ (Olbers et al., 2004). Our ~~data suggest~~ <sup>The</sup>  
459 ~~an~~ increase in the influence of oligotrophic dinocysts at the Antarctic margin during  
460 the late Oligocene and during the MMCO, which ~~argues against the installation of a~~ <sup>clarity</sup>  
461 vigorous ACC at 30 Ma (Scher et al., 2015): ~~No profound changes in surface~~ <sup>The evidence suggest</sup>  
462 paleoceanography ~~emerge from our dinoflagellate cyst data around 30 Ma, and there~~ <sup>not particular change in oceanic conditions</sup>  
463 ~~is no major change in the benthic  $\delta^{18}O$  (Figure 5). Instead, if the Tasmanian Gateway~~ <sup>however</sup>  
464 ~~had opened to an extent that allowed ACC development (Scher et al., 2015), the ACC~~ <sup>is supported</sup>  
465 ~~must have been much weaker than at present throughout the Oligocene and Miocene.~~ <sup>sufficiently to cause</sup>  
466 The strongly ~~different~~ <sup>contrasting</sup> dinocyst assemblages ~~compared~~ to present-day at Site U1356  
467 ~~throughout our record implies to us that a strong coherent ACC was not installed until~~ <sup>in suggests ? did not occur</sup>  
468 after the MMCT (11 Ma). This is consistent with inferences from the lithology at the  
469 same site (Salabarnada et al., submitted this volume), suggesting a proto-ACC much  
470 weaker than at present and, likewise, weaker Southern Ocean frontal systems. <sup>It</sup>  
471 ~~alternative explanation is that the ACC increased in strength during the Oligocene-~~ <sup>is possible</sup>  
472 ~~Miocene, but that this strengthening had no influence on the dinocyst assemblages at~~ <sup>and this did not</sup>  
473 Site U1356. However, the vigorous nature of the ACC influencing surface as well as  
474 bottom waters and ~~governing~~ eddy water circulation in the Southern Ocean (Olbers et  
475 al., 2004) makes such a scenario ~~very~~ <sup>unlikely</sup>. Nevertheless, to ~~fully~~ <sup>investigate</sup> clarify whether

However / Dinocyst

clarity  
however  
Here is  
an  
isotope  
excursion  
at this  
age  
in  
Figure 5

de  
but  
I have  
not  
seen  
this  
paper

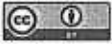

*relative variability*

476 the strength of the ACC changed to its present-day force only after the MMCT (as  
477 suggested by our data), ocean-circulation modelling of time slices younger than the  
478 Oligocene will be required.

*Clarity  
several*

480 5.3 Implications for ice sheet and sea-ice variability

481 The abundance of our sea-ice indicator *Selenopemphix antarctica* throughout  
482 the record is consistently lower than that in present-day dinocyst assemblages at Site  
483 U1356 (Prebble et al., 2013; Figure 3). This suggests that sea-ice conditions were  
484 never as severe as today throughout the studied time interval. Only during two time  
485 intervals of sea-ice indicators suggest some sea ice near the site: the first 1.5 million  
486 years following the Oi-1 glaciation (33.6–32.1 Ma; Figure 5), and during and after the  
487 mid-Miocene climatic Transition (14–11 Ma; Figure 5). Numerical ice-sheet/sea-ice  
488 modelling (DeConto et al., 2007) suggests sea-ice to develop only if the continental ice  
489 sheets reach the coastline. Our lack of sea-ice indicators during most of the Oligocene  
490 and Miocene could thus suggest that the Antarctic continental ice sheet was much  
491 reduced during this time. The finding of a weaker sea-ice season throughout most of  
492 the Oligocene–Miocene at Site U1356 has major implications for regional  
493 paleoceanography because it suggests a decrease in the potential formation of  
494 Antarctic bottom waters at this site.

*relative to*

*"palaeo"*

*There is however evidence*

*during two periods*

*is important*

*follows*

495 The abundance of our oligotrophic taxa broadly co-varied with long-term  
496 Oligocene–Miocene benthic  $\delta^{18}\text{O}$ : During times of low  $\delta^{18}\text{O}$  values in deep-sea benthic  
497 foraminifera (and thus high deep-sea temperatures and less ice volume; e.g., at 32 Ma,  
498 24 Ma and 15 Ma; Figure 5), the abundance of oligotrophic temperate dinocysts was  
499 large (Figure 5). At times of higher  $\delta^{18}\text{O}$  values, lower deep-sea temperatures and

*relative to*

*records*

*Corresponds to  
However during*

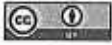

500 higher ice volume (e.g. at 33.5 Ma, 27 Ma, 23 Ma and 13 Ma; Figure 5) temperate  
501 dinocysts ~~were reduced in abundance~~ <sup>become varied</sup> and high-nutrient, sea-ice indicators  
502 (re)appeared. ~~Altogether, this suggests on long time scales, that there was stronger~~ <sup>or the</sup>  
503 influence of warm surface waters at the Wilkes Land Margin ~~at times when ice sheets~~ <sup>reduced</sup>  
504 were smaller ~~and climate was warmer~~, and less influence of warm surface waters  
505 during times of larger ice sheets, ~~hence a connection between ice sheet and~~  
506 ~~oceanographic variability.~~

507 Oxygen-isotope mass-balance calculations suggest that a modern-day-sized  
508 Antarctic ice sheet appeared ~~at~~ <sup>near</sup> the Eocene/Oligocene boundary (DeConto et al.,  
509 2008). Benthic  $\delta^{18}\text{O}$  records suggest that ice sheets fluctuated considerably in size  
510 during the subsequent Oligocene and Miocene (Liebrand et al., 2017). ~~Based on the~~ <sup>is suggested</sup>  
511 heavy  $\delta^{18}\text{O}$  values for Oligocene benthic foraminifera from Maud Rise, it was inferred  
512 that Antarctic ice sheets were near-present-day size throughout the Oligocene  
513 (Hauptvogel et al., 2017). ~~Both~~ <sup>The</sup> isotope studies of Liebrand et al (2017) and  
514 Hauptvogel et al. (2017) assume constant temperatures of the deep sea and similar-  
515 to-present-day  $\delta^{18}\text{O}$  of the continental ice. Our data instead show that the regional  
516 paleoceanography, ~~together with~~ <sup>and</sup> surface-ocean temperature (Hartman et al.,  
517 submitted this volume), ~~can vary considerably both on the long term as on orbital~~ <sup>max have</sup> ~~and~~ <sup>and</sup>  
518 time scales. It remains to be seen whether the variability in paleoceanography found  
519 here can be extrapolated to larger parts of the Antarctic margin, including to those  
520 regions of deep-water formation. Given the high temperatures and absence of strong  
521 sea ice influence, the Wilkes Land margin was likely not the primary sector of deep-  
522 water formation, although there is ample evidence for bottom-current activity at the  
523 site (Salabarnada et al., submitted this volume). ~~However~~ <sup>but</sup> if the oceanographic and

leave out  
speculative

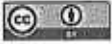

524 climate variability we reconstruct offshore Wilkes Land characterises also regions of  
525 deep-water formation, some (if not much) of the variability both on long and on  
526 orbital time scales in benthic  $\delta^{18}\text{O}$  records is related to deep-sea temperature rather  
527 than Antarctic ice volume (see also Hartman et al., submitted this volume).

(Speculations)

528 Meanwhile, we find little support in our study for the large continental ice sheets  
529 during the Oligocene as concluded by Hauptvogel et al. (2017), given the absence of  
530 dominance of sea-ice dinoflagellate cysts and *in situ* terrestrial palynomorphs  
531 (Strother et al., 2017). As an alternative explanation to the difference in  $\delta^{18}\text{O}$  values  
532 between Maud Rise and Equatorial Pacific during the Oligocene (Hauptvogel et al.,  
533 2017), we suggest that these two records have recorded the characteristics of two  
534 fundamentally different deep water masses, with those at Maud Rise being much  
535 colder and saltier than those at Shatsky Rise.

? you mean ice sheets that reached the coast.

536  
537 6. Conclusions

100

538 The dinocyst assemblage changes in the Oligocene–Miocene (33.6–10 Ma) of Site  
539 U1356 were interpreted in terms of surface paleoceanography based on a  
540 comparison of these assemblages to present-day dinocyst assemblages. This  
541 approach allows us to hypothesize that the southern Ocean paleoceanography during  
542 the Oligocene–Miocene was fundamentally different from that of today. A strong sea-  
543 ice signal (yet still weaker than that of today) emerges for the Wilkes Land Margin  
544 only for the first 1.5 million years of the Oligocene (33.6–32.1 Ma) and the mid-  
545 Miocene climatic transition (14–10 Ma). The remainder of the Oligocene–Miocene  
546 record of surface waters off Wilkes Land were warm, relatively oligotrophic and lack  
547 indications of a prominent sea-ice season. Upwelling at the Antarctic Divergence must

new word

variability

at

This does not preclude the existence of "large" ice sheets

are  
These data suggest  
compared to 2-3  
was present on  
during  
At other times  
the

was

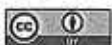

markedly the  
548 have been profoundly weaker during Oligocene and Miocene times, compared to  
549 today. Furthermore, the continental ice sheet must have been much reduced at the  
550 Wilkes Land sub-glacial basin for most of the Oligocene-Miocene compared to today,  
551 and continental ice sheets were retreated inland. The strength of the influence of  
552 warm oligotrophic surface water was strongly coupled to deep-sea  $\delta^{18}\text{O}$  values. With  
553 enhanced low-latitude influence of surface water during times of light  $\delta^{18}\text{O}$  in the  
554 deep sea and *vice versa*. The absence of (a trend towards more) oceanographic  
555 isolation of the Wilkes Land margin throughout the Oligocene to mid-Miocene  
556 suggests that the ACC ~~did not obtain its full, present-day strength until at least the~~  
557 mid-Miocene Climatic transition. ~~Moreover, we note considerable glacial-interglacial~~  
558 ~~variability in this oceanographic setting, with stronger influence of oligotrophic, low-~~  
559 ~~latitude surface waters over Site U1356 during interglacial times and more eutrophic,~~  
560 ~~colder influence during glacial times. This may suggest considerable latitudinal~~  
561 ~~migration of the AAPF over Oligocene and Miocene glacial-interglacial cycles.~~

when  $\delta^{18}\text{O}$  were smaller  
follows water spreads  
??  
may have attained its  
prevalent alternating with  
related to the

### 563 Acknowledgements

564 This research used data and samples from the Integrated Ocean Drilling Program  
565 (IODP). IODP was sponsored by the U.S. National Science Foundation and  
566 participating countries under management of Joined Oceanographic Institutions Inc.  
567 PKB and FS thank NWO-NNPP grant no 866.10.110, NWO-ALW VENI grant no  
568 863.13.002 for funding and Natasja Welters for technical support. CE and AS thank  
569 the Spanish Ministerio de Economía y Competitividad for Grant CTM2014-60451-C2-  
570 1-P.  
571
